# Supplementary material
Source: MDPI journal article supplement (https://www.mdpi.com/2673-6209/4/2/13)
Supplement: s1 [file s1]

Supplemental Information for:

**Influence of Thermal and Chemical Stresses on Thermal Properties, Crystal Morphology, and Mechanical Strength Development of a Sulfur Polymer Composite**

**Perla Y. Saucedo-Oloño,<sup>a</sup> Claudia V. Lopez,<sup>a</sup> Bhakti K. Patel,<sup>a</sup> and Rhett C. Smith\*<sup>a</sup>**

<sup>a</sup>. Department of Chemistry, Clemson University, Clemson, South Carolina, 29634, United States

Correspondence to: Rhett C. Smith (E-mail: [rhett@clemson.edu](mailto:rhett@clemson.edu))

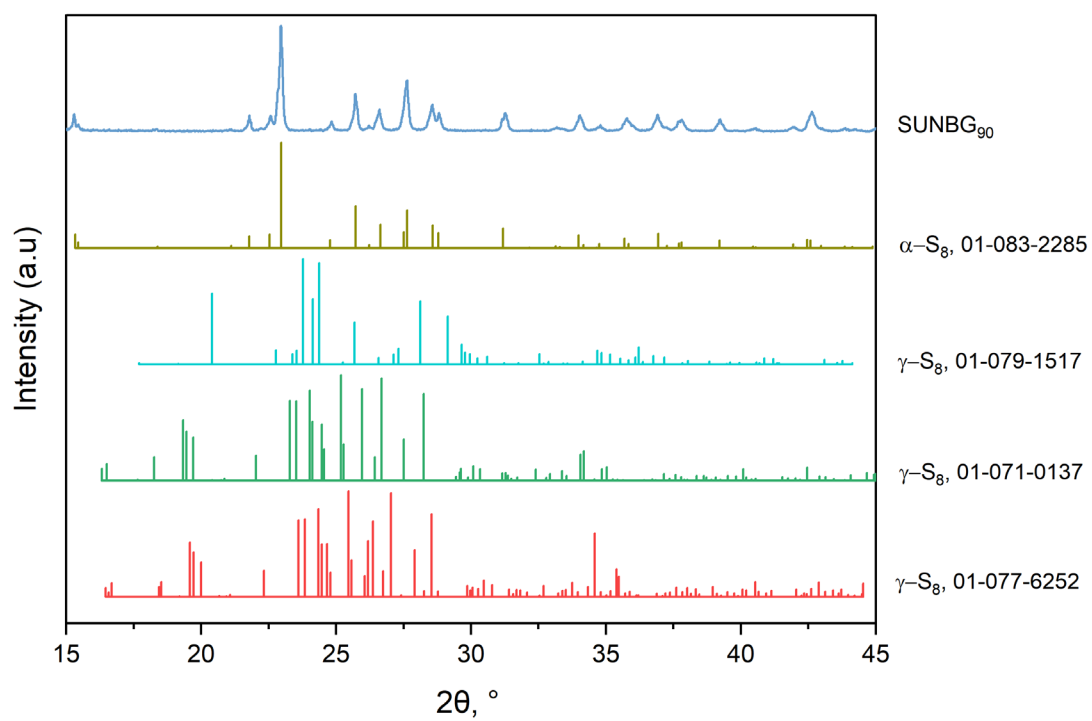

**Figure S1.** Powder-XRD traces for **SunBG<sub>90</sub>** structure, confirming the contribution of  $\gamma$ -sulfur after exposure to hexanes.

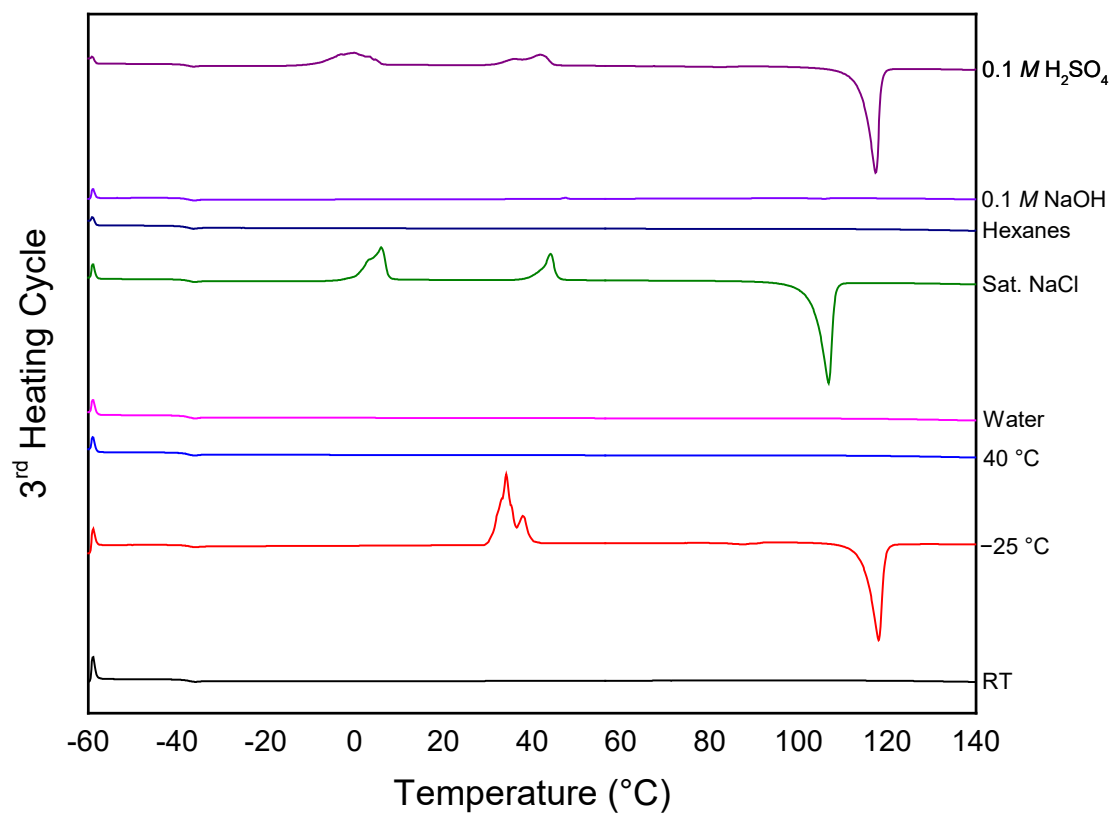

**Figure S2.** Differential scanning calorimetry (DSC) traces for SunBG<sub>90</sub> showing the third heating cycle after exposure to different environmental conditions.

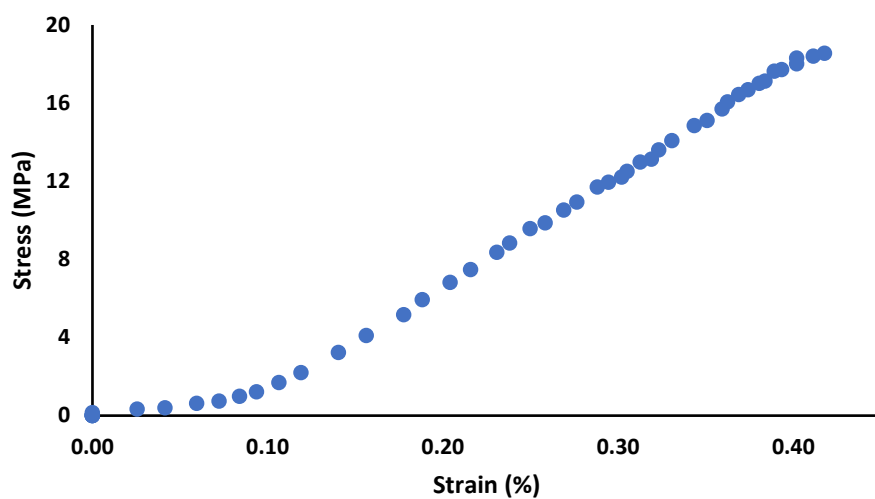

**Figure S3.** Stress-strain plots for measurements of the compressive strength of **SunBG<sub>90</sub>** after 4d at room temperature.

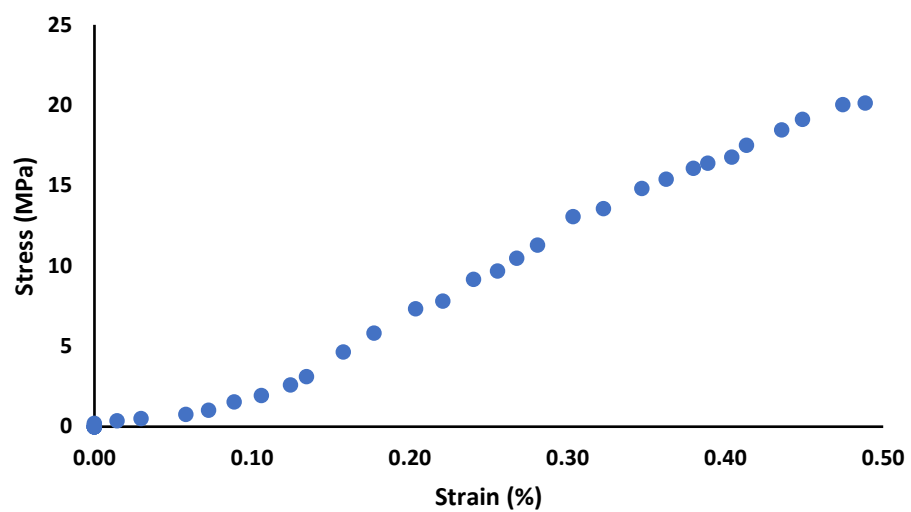

**Figure S4.** Stress-strain plots for measurements of the compressive strength of **SunBG<sub>90</sub>** after 4d exposure at  $-25\text{ }^{\circ}\text{C}$ .

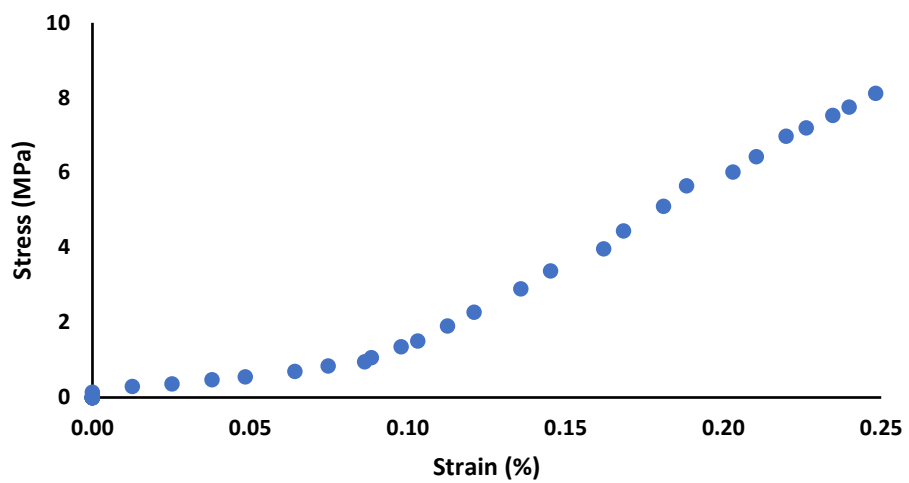

**Figure S5.** Stress-strain plots for measurements of the compressive strength of **SunBG<sub>90</sub>** after 4d exposure at 40 °C.

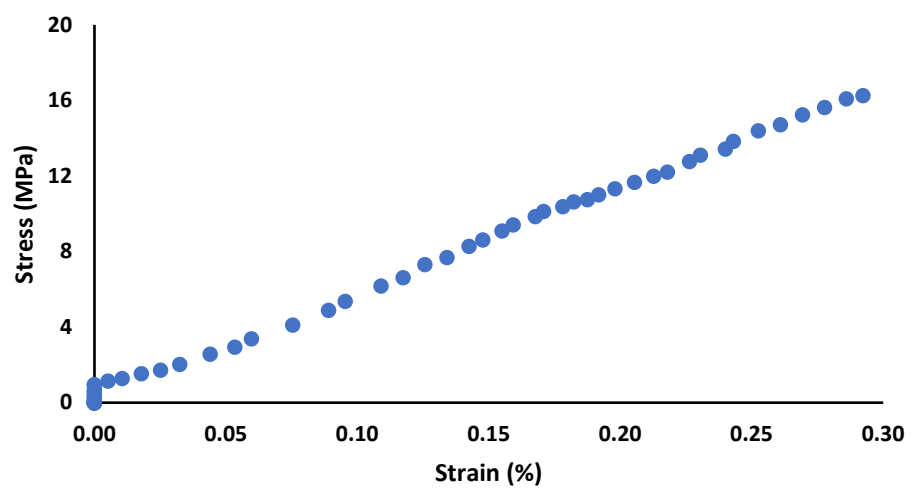

**Figure S6.** Stress-strain plots for measurements of the compressive strength of **SunBG<sub>90</sub>** after 4d exposure to water.

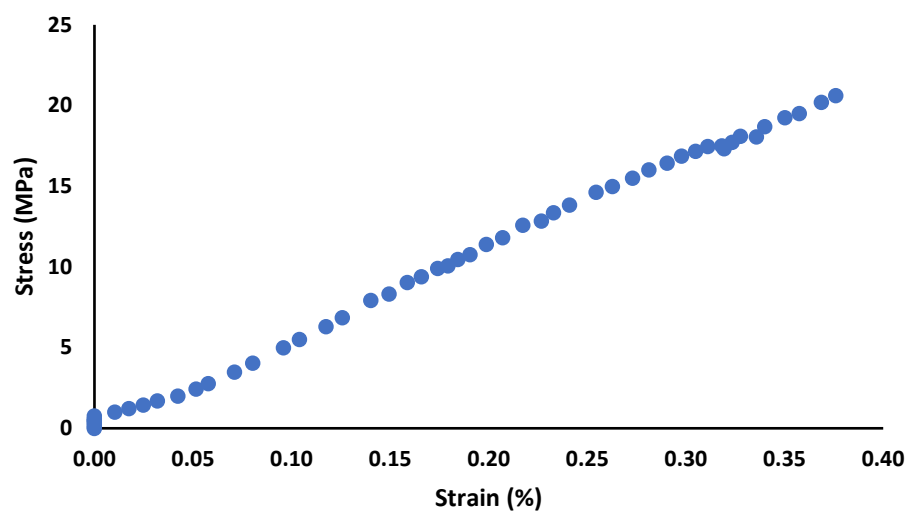

**Figure S7.** Stress-strain plots for measurements of the compressive strength of **SunBG<sub>90</sub>** after 4d exposure to saturated NaCl.



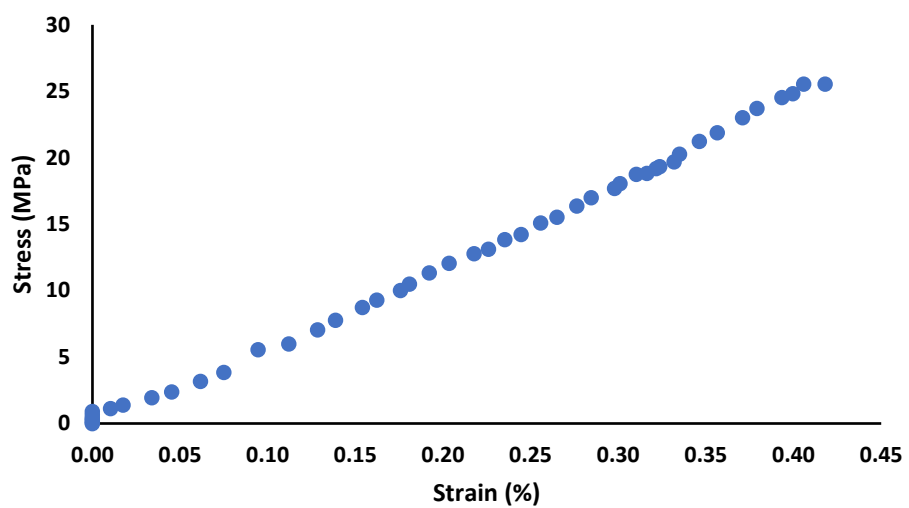

**Figure S8.** Stress-strain plots for measurements of the compressive strength of **SunBG<sub>90</sub>** after 4d exposure to 0.1 M NaOH.

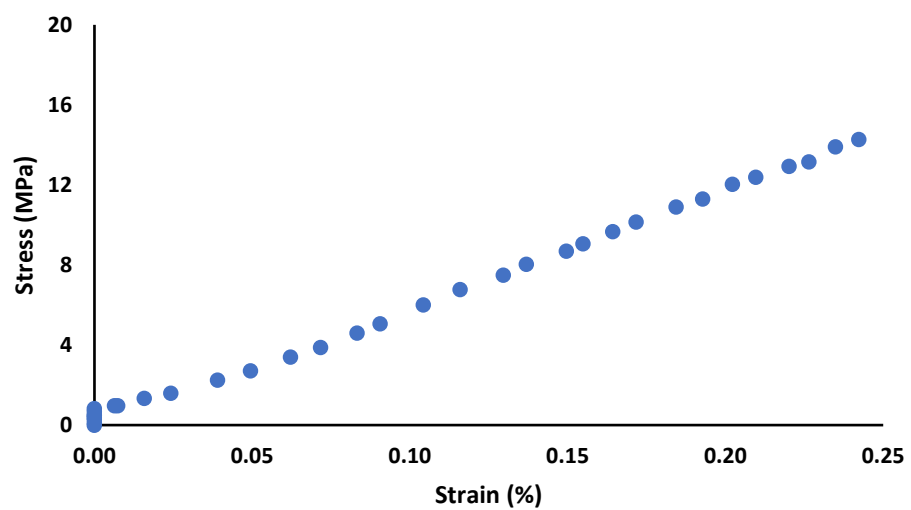

**Figure S9.** Stress-strain plots for measurements of the compressive strength of **SunBG<sub>90</sub>** after 4d exposure to 0.1 M H<sub>2</sub>SO<sub>4</sub>.

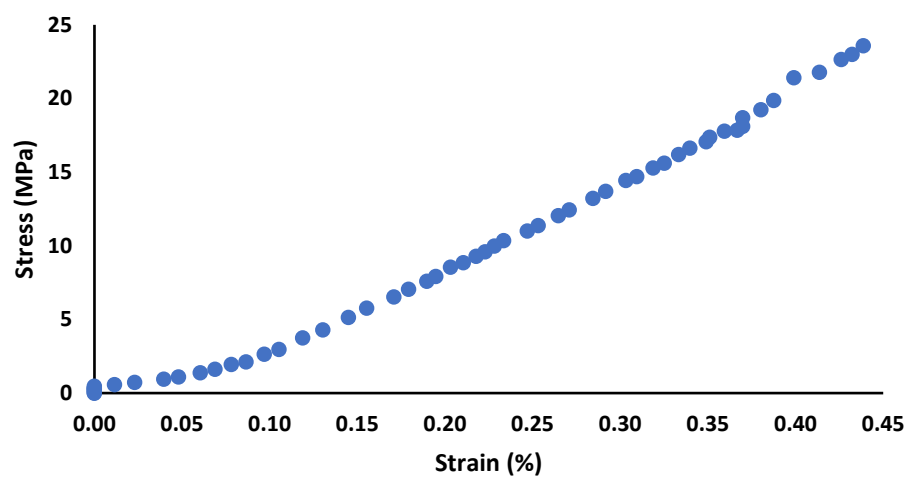

**Figure S10.** Stress-strain plots for measurements of the compressive strength of **SunBG<sub>90</sub>** after 4d exposure to hexanes.

**Table S1.** Dimensional analysis and masses of samples before and after exposure to environmental factors. Samples were cylindrical in shape, so that L1 and L2 represent lengths (heights) of the cylinders measured at two positions with calipers, and D1–4 are diameters cross-section measured at four positions using calipers. The height and diameter used for volume calculations are the average of the individual caliper measurements for a given cylinder.

| Room temperature |                 |       |                 |                        |          |  |                       |
|------------------|-----------------|-------|-----------------|------------------------|----------|--|-----------------------|
|                  | dimensions (cm) |       | Results         |                        | Property |  | Percentage of Initial |
|                  | Before          | After | Initial Volume  | 2.45 cm <sup>3</sup>   | Volume   |  | 99.83                 |
| L1               | 8.94            | 8.95  | Final Volume    | 2.45 cm <sup>3</sup>   | Density  |  | 100.17                |
| L2               | 8.92            | 8.94  | Initial Density | 1.75 g/cm <sup>3</sup> |          |  |                       |
| D1               | 5.87            | 5.85  | Final Density   | 1.75 g/cm <sup>3</sup> |          |  |                       |
| D2               | 5.89            | 5.86  |                 |                        |          |  |                       |
| D3               | 5.94            | 5.95  |                 |                        |          |  |                       |
| D4               | 5.94            | 5.94  |                 |                        |          |  |                       |
| Mass (g)         | 0.43            | 0.43  |                 |                        |          |  |                       |
|                  |                 |       |                 |                        |          |  |                       |
| 40 °C            |                 |       |                 |                        |          |  |                       |
|                  | dimensions (cm) |       | Results         |                        | Property |  | Percentage of Initial |
|                  | Before          | After | Initial Volume  | 2.52 cm <sup>3</sup>   | Volume   |  | 99.81                 |
| L1               | 9.36            | 9.34  | Final Volume    | 2.51 cm <sup>3</sup>   | Density  |  | 100.19                |
| L2               | 9.34            | 9.34  | Initial Density | 1.79 g/cm <sup>3</sup> |          |  |                       |
| D1               | 5.88            | 5.86  | Final Density   | 1.79 g/cm <sup>3</sup> |          |  |                       |
| D2               | 5.87            | 5.91  |                 |                        |          |  |                       |
| D3               | 5.84            | 5.82  |                 |                        |          |  |                       |
| D4               | 5.83            | 5.82  |                 |                        |          |  |                       |
| Mass (g)         | 0.45            | 0.45  |                 |                        |          |  |                       |
|                  |                 |       |                 |                        |          |  |                       |
| Cold (–25 °C)    |                 |       |                 |                        |          |  |                       |
|                  | dimensions (cm) |       | Results         |                        | Property |  | Percentage of Initial |
|                  | Before          | After | Initial Volume  | 2.61 cm <sup>3</sup>   | Volume   |  | 99.45                 |
| L1               | 9.48            | 9.47  | Final Volume    | 2.60 cm <sup>3</sup>   | Density  |  | 100.55                |
| L2               | 9.56            | 9.53  | Initial Density | 1.75 g/cm <sup>3</sup> |          |  |                       |
| D1               | 5.90            | 5.90  | Final Density   | 1.76 g/cm <sup>3</sup> |          |  |                       |
| D2               | 5.89            | 5.91  |                 |                        |          |  |                       |
| D3               | 5.92            | 5.89  |                 |                        |          |  |                       |
| D4               | 5.92            | 5.89  |                 |                        |          |  |                       |
| Mass (g)         | 0.46            | 0.46  |                 |                        |          |  |                       |
|                  |                 |       |                 |                        |          |  |                       |
| Sat. NaCl        |                 |       |                 |                        |          |  |                       |
|                  | dimensions (cm) |       | Results         |                        | Property |  | Percentage of Initial |
|                  | Before          | After | Initial Volume  | 2.58 cm <sup>3</sup>   | Volume   |  | 99.83                 |
| L1               | 9.46            | 9.50  | Final Volume    | 2.58 cm <sup>3</sup>   | Density  |  | 100.17                |
| L2               | 9.47            | 9.43  | Initial Density | 1.80 g/cm <sup>3</sup> |          |  |                       |
| D1               | 5.92            | 5.90  | Final Density   | 1.80 g/cm <sup>3</sup> |          |  |                       |
| D2               | 5.88            | 5.89  |                 |                        |          |  |                       |
| D3               | 5.92            | 5.91  |                 |                        |          |  |                       |
| D4               | 5.85            | 5.85  |                 |                        |          |  |                       |
| Mass (g)         | 0.46            | 0.46  |                 |                        |          |  |                       |

(cont'd)

| Water         |                 |       |      |                 |                        |  |          |                       |
|---------------|-----------------|-------|------|-----------------|------------------------|--|----------|-----------------------|
|               | dimensions (cm) |       |      | Results         |                        |  | Property | Percentage of Initial |
|               | Before          | After |      | Initial Volume  | 2.50 cm <sup>3</sup>   |  | Volume   | 99.58                 |
| L1            | 9.51            | 9.48  |      | Final Volume    | 2.49 cm <sup>3</sup>   |  | Density  | 100.19                |
| L2            | 9.49            | 9.49  |      | Initial Density | 1.73 g/cm <sup>3</sup> |  |          |                       |
| D1            | 5.85            | 5.85  |      | Final Density   | 1.73 g/cm <sup>3</sup> |  |          |                       |
| D2            | 5.86            | 5.85  |      |                 |                        |  |          |                       |
| D3            | 5.71            | 5.69  |      |                 |                        |  |          |                       |
| D4            | 5.74            | 5.74  |      |                 |                        |  |          |                       |
| Mass (g)      | 0.43            | 0.43  |      |                 |                        |  |          |                       |
|               |                 |       |      |                 |                        |  |          |                       |
| NaOH          |                 |       |      |                 |                        |  |          |                       |
|               | dimensions (cm) |       |      | Results         |                        |  | Property | Percentage of Initial |
|               | Before          | After |      | Initial Volume  | 2.57 cm <sup>3</sup>   |  | Volume   | 99.66                 |
| L1            | 9.54            | 9.55  |      | Final Volume    | 2.56 cm <sup>3</sup>   |  | Density  | 100.57                |
| L2            | 9.42            | 9.40  |      | Initial Density | 1.76 g/cm <sup>3</sup> |  |          |                       |
| D1            | 5.78            | 5.80  |      | Final Density   | 1.77 g/cm <sup>3</sup> |  |          |                       |
| D2            | 5.80            | 5.76  |      |                 |                        |  |          |                       |
| D3            | 5.79            | 5.82  |      |                 |                        |  |          |                       |
| D4            | 5.80            | 5.74  |      |                 |                        |  |          |                       |
| Mass (g)      | 0.44            | 0.44  |      |                 |                        |  |          |                       |
|               |                 |       |      |                 |                        |  |          |                       |
| Sulfuric Acid |                 |       |      |                 |                        |  |          |                       |
|               | dimensions (cm) |       |      | Results         |                        |  | Property | Percentage of Initial |
|               | Before          | After |      | Initial Volume  | 2.50 cm <sup>3</sup>   |  | Volume   | 99.52                 |
| L1            | L1              | 9.54  | 9.55 | Final Volume    | 2.49 cm <sup>3</sup>   |  | Density  | 99.80                 |
| L2            | L2              | 9.42  | 9.40 | Initial Density | 1.76 g/cm <sup>3</sup> |  |          |                       |
| D1            | D1              | 5.78  | 5.80 | Final Density   | 1.75 g/cm <sup>3</sup> |  |          |                       |
| D2            | D2              | 5.80  | 5.76 |                 |                        |  |          |                       |
| D3            | D3              | 5.79  | 5.82 |                 |                        |  |          |                       |
| D4            | D4              | 5.80  | 5.74 |                 |                        |  |          |                       |
| Mass (g)      | Weight          | 0.44  | 0.44 |                 |                        |  |          |                       |
|               |                 |       |      |                 |                        |  |          |                       |
| Hexanes       |                 |       |      |                 |                        |  |          |                       |
|               | dimensions (cm) |       |      | Results         |                        |  | Property | Percentage of Initial |
|               | Before          | After |      | Initial Volume  | 2.59 cm <sup>3</sup>   |  | Volume   | 103.05                |
| L1            | 9.74            | 9.54  |      | Final Volume    | 2.67 cm <sup>3</sup>   |  | Density  | 95.14                 |
| L2            | 9.56            | 9.75  |      | Initial Density | 1.77 g/cm <sup>3</sup> |  |          |                       |
| D1            | 5.93            | 5.91  |      | Final Density   | 1.69 g/cm <sup>3</sup> |  |          |                       |
| D2            | 5.83            | 5.91  |      |                 |                        |  |          |                       |
| D3            | 5.77            | 5.89  |      |                 |                        |  |          |                       |
| D4            | 5.85            | 6.03  |      |                 |                        |  |          |                       |
| Mass (g)      | 0.46            | 0.45  |      |                 |                        |  |          |                       |

### **Supporting Information File S1:**

Modelling of  $\gamma$ -sulfur contribution to microstructure after exposure to hexanes at room temperature

## SUN-BG-90-WPPF report (SUN-BG-90)

---

### General information

|                     |                                         |                      |                     |
|---------------------|-----------------------------------------|----------------------|---------------------|
| Analysis date       | 2023-08-04 12:14:46                     | Measurement start... | 2023-08-04 09:46:33 |
| Analyst             | Administrator                           | Operator             | Administrator       |
| Sample name         |                                         | Comment              |                     |
| Measured data na... | C:\XRD Data\Kolis\Bhakti\SUN-BG-90.rasx | Memo                 |                     |

### WPPF analysis results

| Phase / Dataset |                                     | SUN-BG-90 |
|-----------------|-------------------------------------|-----------|
|                 | Rwp, %                              | 0.00      |
|                 | Rp, %                               | 0.00      |
|                 | S                                   | 0.0000    |
|                 | $\chi^2$                            | 0.0000    |
| ▲               | a-S8, cyclo-octasulfur, sulfur, syn |           |
|                 | Weight fraction, wt%                | 96.44     |
|                 | a, Å                                | 10.48787  |
|                 | b, Å                                | 12.96149  |
|                 | c, Å                                | 24.54893  |
|                 | $\alpha$ , °                        | 90.000    |
|                 | $\beta$ , °                         | 90.000    |
|                 | $\gamma$ , °                        | 90.000    |
|                 | Lattice volume, Å <sup>3</sup>      | 3337.143  |
|                 | Size, Å                             | 0.0       |
|                 | Strain, %                           | 0.02(6)   |
| ▲               | rosickyite low, cyclo-octasulfur    |           |
|                 | Weight fraction, wt%                | 1.95      |
|                 | a, Å                                | 10.56488  |
|                 | b, Å                                | 10.58617  |
|                 | c, Å                                | 10.71125  |
|                 | $\alpha$ , °                        | 90.000    |
|                 | $\beta$ , °                         | 95.637    |
|                 | $\gamma$ , °                        | 90.000    |
|                 | Lattice volume, Å <sup>3</sup>      | 1192.170  |
|                 | Size, Å                             | 0.0       |
|                 | Strain, %                           | 0.083(9)  |
| ▲               | Rosickyite, syn                     |           |
|                 | Weight fraction, wt%                | 1.28      |
|                 | a, Å                                | 8.31168   |
|                 | b, Å                                | 12.83076  |
|                 | c, Å                                | 9.10992   |
|                 | $\alpha$ , °                        | 90.000    |
|                 | $\beta$ , °                         | 124.890   |
|                 | $\gamma$ , °                        | 90.000    |
|                 | Lattice volume, Å <sup>3</sup>      | 796.898   |
|                 | Size, Å                             | 0.0       |



## WPPF analysis results

| Phase / Dataset |                                | SUN-BG-90 |
|-----------------|--------------------------------|-----------|
| ▲               | Rosickyite, syn                |           |
|                 | Strain, %                      | 0.083(9)  |
| ▲               | ?-S8                           |           |
|                 | Weight fraction, wt%           | 0.33      |
|                 | a, Å                           | 11.02951  |
|                 | b, Å                           | 10.95784  |
|                 | c, Å                           | 10.89223  |
|                 | $\alpha$ , °                   | 90.000    |
|                 | $\beta$ , °                    | 95.920    |
|                 | $\gamma$ , °                   | 90.000    |
|                 | Lattice volume, Å <sup>3</sup> | 1309.410  |
|                 | Size, Å                        | 0.0       |
|                 | Strain, %                      | 0.10(3)   |

## WPPF weight fraction

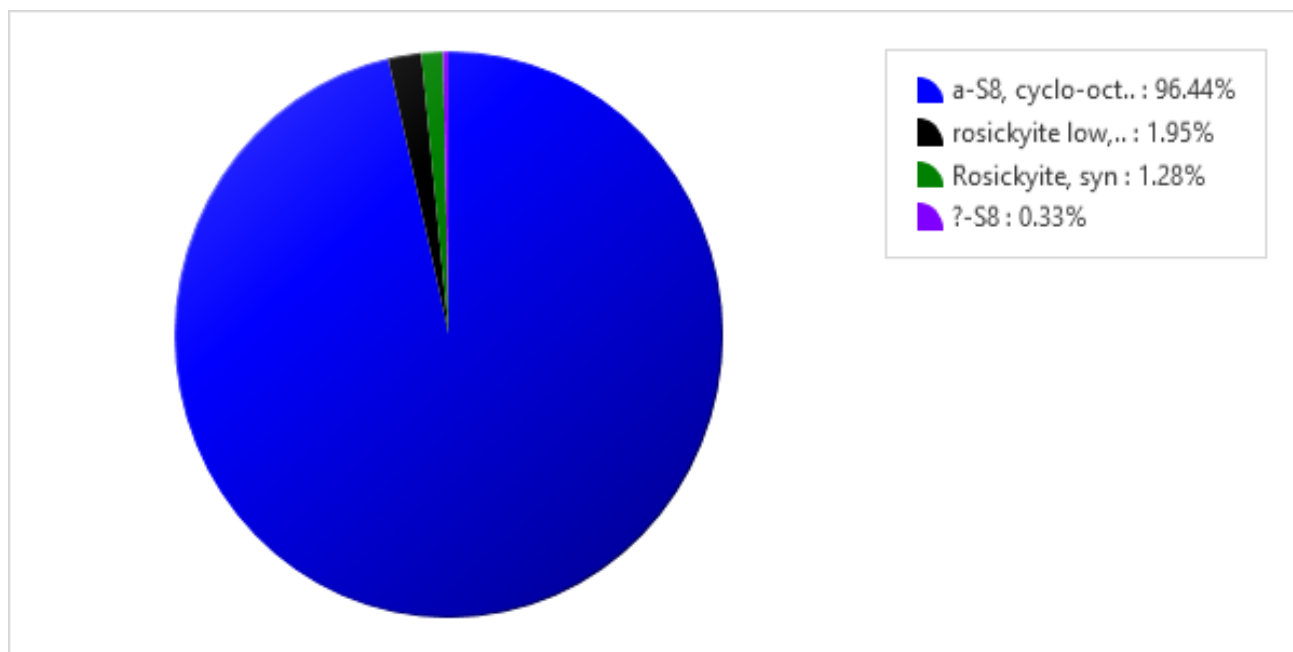

### WPPF Profile View

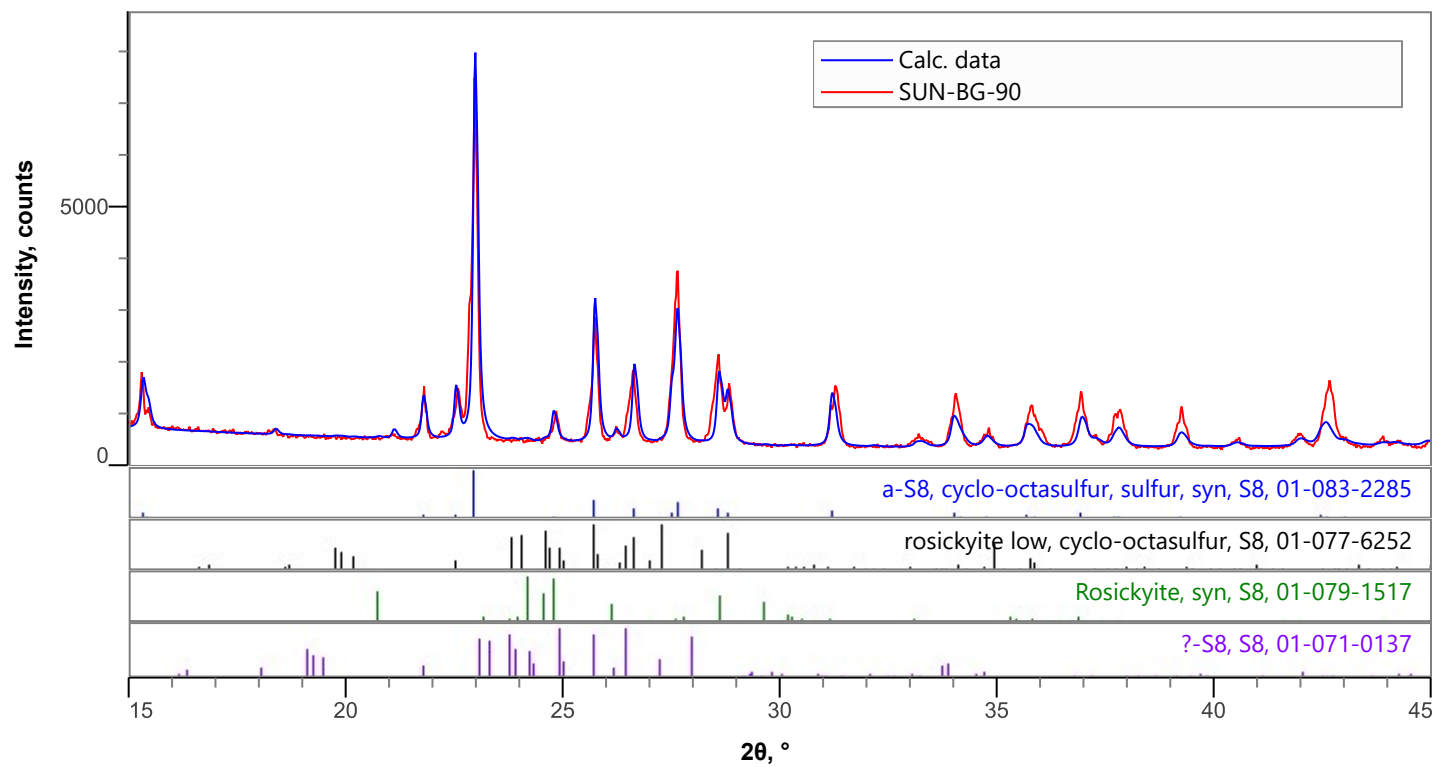

### Lattice parameters

| Phase name           | a, Å     | b, Å     | c, Å     | $\alpha$ , ° | $\beta$ , ° | $\gamma$ , ° |
|----------------------|----------|----------|----------|--------------|-------------|--------------|
| a-S8, cyclo-octa...  | 10.48787 | 12.96149 | 24.54893 | 90.000       | 90.000      | 90.000       |
| rosickyite low, c... | 10.56488 | 10.58617 | 10.71125 | 90.000       | 95.637      | 90.000       |
| Rosickyite, syn      | 8.31168  | 12.83076 | 9.10992  | 90.000       | 124.890     | 90.000       |
| ?-S8                 | 11.02951 | 10.95784 | 10.89223 | 90.000       | 95.920      | 90.000       |

### d-I List

---

**a-S8, cyclo-octasulfur, sulfur, syn**

| No. | 2 $\theta$ , ° | d, Å    | h k l  | Norm. I. |
|-----|----------------|---------|--------|----------|
| 1   | 15.32871       | 5.77565 | 1 1 3  | 13.00    |
| 2   | 15.44892       | 5.73098 | 0 2 2  | 5.40     |
| 3   | 18.38323       | 4.82229 | 2 0 2  | 1.50     |
| 4   | 21.10557       | 4.20602 | 1 1 5  | 2.30     |
| 5   | 21.78393       | 4.07655 | 2 2 0  | 11.10    |
| 6   | 22.53161       | 3.94294 | 1 3 1  | 12.90    |
| 7   | 22.96941       | 3.86877 | 2 2 2  | 100.00   |
| 8   | 24.78121       | 3.58987 | 1 3 3  | 7.70     |
| 9   | 25.72928       | 3.45970 | 0 2 6  | 39.60    |
| 10  | 26.22270       | 3.39571 | 2 2 4  | 3.20     |
| 11  | 26.63657       | 3.34388 | 3 1 1  | 22.20    |
| 12  | 27.50384       | 3.24037 | 0 4 0  | 15.00    |
| 13  | 27.63069       | 3.22578 | 2 0 6  | 35.80    |
| 14  | 27.66731       | 3.22160 | 1 1 7  | 0.00     |
| 15  | 28.58419       | 3.12031 | 3 1 3  | 21.70    |
| 16  | 28.78789       | 3.09869 | 1 3 5  | 14.30    |
| 17  | 29.07624       | 3.06862 | 0 0 8  | 0.00     |
| 18  | 30.94066       | 2.88782 | 2 2 6  | 0.00     |
| 19  | 31.18793       | 2.86549 | 0 4 4  | 18.80    |
| 20  | 32.15532       | 2.78146 | 3 1 5  | 0.40     |
| 21  | 33.13780       | 2.70120 | 3 3 1  | 1.80     |
| 22  | 33.28530       | 2.68957 | 2 4 2  | 1.30     |
| 23  | 33.98862       | 2.63550 | 1 3 7  | 12.20    |
| 24  | 34.16948       | 2.62197 | 4 0 0  | 3.00     |
| 25  | 34.64948       | 2.58674 | 1 1 9  | 0.70     |
| 26  | 34.75422       | 2.57918 | 3 3 3  | 4.00     |
| 27  | 35.67694       | 2.51456 | 2 4 4  | 9.10     |
| 28  | 35.84069       | 2.50345 | 1 5 1  | 4.20     |
| 29  | 36.62437       | 2.45166 | 2 2 8  | 0.00     |
| 30  | 36.93205       | 2.43193 | 3 1 7  | 13.70    |
| 31  | 37.26217       | 2.41114 | 4 0 4  | 2.50     |
| 32  | 37.35467       | 2.40539 | 1 5 3  | 0.00     |
| 33  | 37.69768       | 2.38428 | 4 2 2  | 4.60     |
| 34  | 37.80529       | 2.37774 | 3 3 5  | 5.60     |
| 35  | 39.21046       | 2.29571 | 0 2 10 | 7.40     |
| 36  | 39.38180       | 2.28611 | 2 4 6  | 0.10     |
| 37  | 39.85950       | 2.25981 | 4 2 4  | 0.20     |
| 38  | 39.99187       | 2.25264 | 1 3 9  | 0.00     |
| 39  | 40.23617       | 2.23952 | 1 5 5  | 0.00     |

**a-S8, cyclo-octasulfur, sulfur, syn**

| No. | 2 $\theta$ , ° | d, Å    | h k l  | Norm. I. |
|-----|----------------|---------|--------|----------|
| 40  | 40.45165       | 2.22809 | 0 4 8  | 1.50     |
| 41  | 40.54205       | 2.22333 | 2 0 10 | 0.90     |
| 42  | 41.93707       | 2.15254 | 1 1 11 | 3.60     |
| 43  | 42.02621       | 2.14818 | 3 3 7  | 0.60     |
| 44  | 42.45327       | 2.12755 | 0 6 2  | 8.20     |
| 45  | 42.57981       | 2.12152 | 3 1 9  | 7.30     |
| 46  | 42.97308       | 2.10301 | 2 2 10 | 2.30     |
| 47  | 43.26135       | 2.08966 | 4 2 6  | 0.30     |
| 48  | 43.58619       | 2.07484 | 3 5 1  | 0.00     |
| 49  | 43.84237       | 2.06331 | 5 1 1  | 1.60     |
| 50  | 44.12696       | 2.05066 | 2 4 8  | 1.40     |
| 51  | 44.23856       | 2.04574 | 0 0 12 | 0.00     |
| 52  | 44.26424       | 2.04462 | 1 5 7  | 0.30     |
| 53  | 44.40924       | 2.03828 | 4 4 0  | 0.00     |
| 54  | 44.88011       | 2.01798 | 3 5 3  | 2.80     |

**rosickyite low, cyclo-octasulfur**

| No. | 2 $\theta$ , ° | d, Å    | h k l  | Norm. I. |
|-----|----------------|---------|--------|----------|
| 1   | 16.61994       | 5.32973 | 0 0 2  | 8.60     |
| 2   | 16.73581       | 5.29309 | 0 2 0  | 4.30     |
| 3   | 16.85186       | 5.25689 | 2 0 0  | 13.10    |
| 4   | 17.89003       | 4.95411 | 1 0 -2 | 0.10     |
| 5   | 18.05236       | 4.90992 | 2 0 -1 | 0.10     |
| 6   | 18.62417       | 4.76044 | 0 1 2  | 9.50     |
| 7   | 18.70210       | 4.74078 | 0 2 1  | 14.10    |
| 8   | 18.75410       | 4.72775 | 1 2 0  | 0.00     |
| 9   | 18.83217       | 4.70833 | 2 1 0  | 0.00     |
| 10  | 19.38198       | 4.57599 | 1 0 2  | 0.80     |
| 11  | 19.53235       | 4.54110 | 2 0 1  | 0.00     |
| 12  | 19.76990       | 4.48707 | 1 1 -2 | 51.50    |
| 13  | 19.91746       | 4.45416 | 2 1 -1 | 42.40    |
| 14  | 20.19169       | 4.39428 | 1 2 -1 | 32.60    |
| 15  | 20.87136       | 4.25269 | 1 2 1  | 1.00     |
| 16  | 21.13432       | 4.20037 | 1 1 2  | 0.80     |
| 17  | 21.27280       | 4.17333 | 2 1 1  | 2.00     |
| 18  | 22.54160       | 3.94122 | 2 0 -2 | 25.00    |
| 19  | 23.67101       | 3.75566 | 0 2 2  | 0.00     |
| 20  | 23.83681       | 3.72992 | 2 2 0  | 72.60    |
| 21  | 24.07502       | 3.69355 | 2 1 -2 | 73.70    |

**rosickyite low, cyclo-octasulfur**

| No. | 2 $\theta$ , ° | d, Å    | h k l  | Norm. I. |
|-----|----------------|---------|--------|----------|
| 22  | 24.59250       | 3.61699 | 1 2 -2 | 83.40    |
| 23  | 24.71258       | 3.59968 | 2 2 -1 | 49.90    |
| 24  | 24.91146       | 3.57139 | 2 0 2  | 50.00    |
| 25  | 25.04142       | 3.55315 | 0 0 3  | 23.30    |
| 26  | 25.39411       | 3.50460 | 3 0 0  | 0.00     |
| 27  | 25.64313       | 3.47112 | 1 0 -3 | 0.00     |
| 28  | 25.71416       | 3.46170 | 1 2 2  | 100.00   |
| 29  | 25.82936       | 3.44652 | 2 2 1  | 34.90    |
| 30  | 25.95006       | 3.43076 | 3 0 -1 | 0.00     |
| 31  | 26.31499       | 3.38401 | 2 1 2  | 19.90    |
| 32  | 26.43851       | 3.36848 | 0 1 3  | 52.90    |
| 33  | 26.58750       | 3.34994 | 0 3 1  | 0.00     |
| 34  | 26.62478       | 3.34533 | 1 3 0  | 71.50    |
| 35  | 26.77403       | 3.32702 | 3 1 0  | 0.00     |
| 36  | 27.01121       | 3.29834 | 1 1 -3 | 24.60    |
| 37  | 27.24892       | 3.27011 | 1 0 3  | 0.00     |
| 38  | 27.30384       | 3.26365 | 3 1 -1 | 98.20    |
| 39  | 27.53922       | 3.23629 | 3 0 1  | 0.00     |
| 40  | 27.67498       | 3.22072 | 1 3 -1 | 1.90     |
| 41  | 28.18391       | 3.16371 | 1 3 1  | 44.60    |
| 42  | 28.20719       | 3.16115 | 2 2 -2 | 0.00     |
| 43  | 28.54568       | 3.12443 | 1 1 3  | 5.70     |
| 44  | 28.82395       | 3.09490 | 3 1 1  | 78.30    |
| 45  | 28.89096       | 3.08787 | 2 0 -3 | 0.00     |
| 46  | 29.06328       | 3.06996 | 3 0 -2 | 5.40     |
| 47  | 30.12284       | 2.96434 | 2 1 -3 | 0.00     |
| 48  | 30.16265       | 2.96052 | 2 2 2  | 10.60    |
| 49  | 30.27169       | 2.95010 | 0 2 3  | 6.30     |
| 50  | 30.28877       | 2.94848 | 3 1 -2 | 0.00     |
| 51  | 30.35405       | 2.94228 | 0 3 2  | 8.90     |
| 52  | 30.48594       | 2.92985 | 2 3 0  | 0.00     |
| 53  | 30.56846       | 2.92213 | 3 2 0  | 8.00     |
| 54  | 30.77875       | 2.90265 | 1 2 -3 | 15.50    |
| 55  | 31.03878       | 2.87892 | 3 2 -1 | 0.00     |
| 56  | 31.09146       | 2.87416 | 1 3 -2 | 11.50    |
| 57  | 31.18832       | 2.86546 | 2 3 -1 | 0.00     |
| 58  | 31.72538       | 2.81816 | 2 0 3  | 7.20     |
| 59  | 31.88378       | 2.80452 | 3 0 2  | 2.70     |
| 60  | 32.00269       | 2.79437 | 1 3 2  | 6.60     |

**rosickyite low, cyclo-octasulfur**

| No. | 2 $\theta$ , ° | d, Å    | h k l  | Norm. I. |
|-----|----------------|---------|--------|----------|
| 61  | 32.09708       | 2.78637 | 2 3 1  | 0.00     |
| 62  | 32.14886       | 2.78200 | 1 2 3  | 6.30     |
| 63  | 32.39900       | 2.76109 | 3 2 1  | 4.40     |
| 64  | 32.86105       | 2.72332 | 2 1 3  | 1.30     |
| 65  | 33.01458       | 2.71100 | 3 1 2  | 10.70    |
| 66  | 33.57284       | 2.66719 | 2 2 -3 | 3.50     |
| 67  | 33.60298       | 2.66486 | 0 0 4  | 0.00     |
| 68  | 33.72350       | 2.65561 | 3 2 -2 | 5.90     |
| 69  | 33.84257       | 2.64654 | 0 4 0  | 6.60     |
| 70  | 33.85217       | 2.64581 | 1 0 -4 | 0.00     |
| 71  | 34.07575       | 2.62896 | 2 3 -2 | 0.00     |
| 72  | 34.08265       | 2.62845 | 4 0 0  | 13.60    |
| 73  | 34.09561       | 2.62748 | 3 0 -3 | 0.00     |
| 74  | 34.29915       | 2.61235 | 4 0 -1 | 4.60     |
| 75  | 34.68399       | 2.58424 | 0 1 4  | 9.60     |
| 76  | 34.90252       | 2.56856 | 0 4 1  | 0.00     |
| 77  | 34.92638       | 2.56686 | 1 1 -4 | 0.00     |
| 78  | 34.93169       | 2.56648 | 1 4 0  | 60.00    |
| 79  | 35.15069       | 2.55099 | 4 1 0  | 4.60     |
| 80  | 35.16330       | 2.55010 | 3 1 -3 | 0.00     |
| 81  | 35.36145       | 2.53627 | 4 1 -1 | 1.60     |
| 82  | 35.52757       | 2.52479 | 1 0 4  | 5.60     |
| 83  | 35.74196       | 2.51013 | 2 3 2  | 26.30    |
| 84  | 35.76007       | 2.50890 | 1 4 -1 | 0.00     |
| 85  | 35.83580       | 2.50378 | 0 3 3  | 19.10    |
| 86  | 35.95631       | 2.49566 | 4 0 1  | 0.00     |
| 87  | 36.07752       | 2.48755 | 2 2 3  | 3.70     |
| 88  | 36.09167       | 2.48661 | 3 3 0  | 0.00     |
| 89  | 36.16598       | 2.48167 | 1 4 1  | 0.00     |
| 90  | 36.21904       | 2.47816 | 3 2 2  | 0.00     |
| 91  | 36.23575       | 2.47705 | 2 0 -4 | 5.10     |
| 92  | 36.27339       | 2.47457 | 1 3 -3 | 0.00     |
| 93  | 36.49855       | 2.45982 | 3 3 -1 | 1.70     |
| 94  | 36.55874       | 2.45591 | 1 1 4  | 1.60     |
| 95  | 36.57334       | 2.45496 | 4 0 -2 | 0.00     |
| 96  | 36.97713       | 2.42907 | 4 1 1  | 0.00     |
| 97  | 37.24997       | 2.41191 | 2 1 -4 | 3.30     |
| 98  | 37.46530       | 2.39854 | 1 3 3  | 1.10     |
| 99  | 37.57973       | 2.39150 | 4 1 -2 | 3.60     |

**rosickyite low, cyclo-octasulfur**

| No. | 2 $\theta$ , ° | d, Å    | h k l  | Norm. I. |
|-----|----------------|---------|--------|----------|
| 100 | 37.68434       | 2.38510 | 3 3 1  | 0.00     |
| 101 | 37.75281       | 2.38093 | 3 0 3  | 4.10     |
| 102 | 37.76445       | 2.38022 | 0 2 4  | 0.00     |
| 103 | 37.92705       | 2.37039 | 0 4 2  | 0.00     |
| 104 | 37.98980       | 2.36662 | 1 2 -4 | 8.80     |
| 105 | 38.03557       | 2.36388 | 2 4 0  | 0.00     |
| 106 | 38.19853       | 2.35417 | 4 2 0  | 0.00     |
| 107 | 38.21028       | 2.35347 | 3 2 -3 | 4.70     |
| 108 | 38.39484       | 2.34258 | 4 2 -1 | 8.60     |
| 109 | 38.53582       | 2.33433 | 1 4 -2 | 3.20     |
| 110 | 38.61615       | 2.32966 | 2 4 -1 | 0.00     |
| 111 | 38.71773       | 2.32378 | 2 3 -3 | 7.30     |
| 112 | 38.73299       | 2.32290 | 3 1 3  | 0.00     |
| 113 | 38.85100       | 2.31612 | 3 3 -2 | 2.50     |
| 114 | 39.29477       | 2.29098 | 1 4 2  | 0.00     |
| 115 | 39.34809       | 2.28800 | 2 0 4  | 9.60     |
| 116 | 39.37380       | 2.28656 | 2 4 1  | 0.00     |
| 117 | 39.51314       | 2.27882 | 1 2 4  | 3.30     |
| 118 | 39.66304       | 2.27055 | 4 0 2  | 1.40     |
| 119 | 39.90513       | 2.25733 | 4 2 1  | 4.60     |
| 120 | 40.16108       | 2.24353 | 2 2 -4 | 3.40     |
| 121 | 40.29551       | 2.23636 | 2 1 4  | 0.90     |
| 122 | 40.42687       | 2.22939 | 3 0 -4 | 0.00     |
| 123 | 40.47074       | 2.22708 | 4 2 -2 | 7.00     |
| 124 | 40.60433       | 2.22006 | 4 1 2  | 6.50     |
| 125 | 40.60676       | 2.21993 | 4 0 -3 | 0.00     |
| 126 | 40.95065       | 2.20208 | 2 3 3  | 14.10    |
| 127 | 41.04690       | 2.19714 | 2 4 -2 | 0.00     |
| 128 | 41.07786       | 2.19555 | 3 3 2  | 5.10     |
| 129 | 41.35372       | 2.18154 | 3 1 -4 | 3.50     |
| 130 | 41.53030       | 2.17267 | 4 1 -3 | 0.00     |
| 131 | 41.55647       | 2.17137 | 3 2 3  | 6.00     |
| 132 | 42.36268       | 2.13189 | 0 0 5  | 0.00     |
| 133 | 42.39112       | 2.13053 | 1 0 -5 | 0.00     |
| 134 | 42.47360       | 2.12658 | 0 3 4  | 0.00     |
| 135 | 42.47851       | 2.12634 | 2 4 2  | 7.00     |
| 136 | 42.55971       | 2.12248 | 0 4 3  | 0.00     |
| 137 | 42.67810       | 2.11686 | 1 3 -4 | 1.30     |
| 138 | 42.78141       | 2.11199 | 3 4 0  | 3.40     |



**rosickyite low, cyclo-octasulfur**

| No. | 2 $\theta$ , ° | d, Å    | h k l  | Norm. I. |
|-----|----------------|---------|--------|----------|
| 139 | 42.86773       | 2.10794 | 4 3 0  | 0.00     |
| 140 | 42.87841       | 2.10744 | 3 3 -3 | 2.70     |
| 141 | 42.93912       | 2.10460 | 1 4 -3 | 0.00     |
| 142 | 42.97851       | 2.10276 | 5 0 0  | 0.00     |
| 143 | 42.98214       | 2.10259 | 5 0 -1 | 0.00     |
| 144 | 43.03382       | 2.10018 | 2 2 4  | 0.00     |
| 145 | 43.04626       | 2.09961 | 4 3 -1 | 8.00     |
| 146 | 43.13484       | 2.09550 | 3 4 -1 | 0.00     |
| 147 | 43.25551       | 2.08993 | 0 1 5  | 0.00     |
| 148 | 43.28348       | 2.08865 | 1 1 -5 | 0.00     |
| 149 | 43.32660       | 2.08667 | 4 2 2  | 13.70    |
| 150 | 43.54589       | 2.07667 | 0 5 1  | 0.00     |
| 151 | 43.57012       | 2.07557 | 1 5 0  | 5.10     |
| 152 | 43.86123       | 2.06246 | 5 1 0  | 6.40     |
| 153 | 43.86480       | 2.06230 | 5 1 -1 | 0.00     |
| 154 | 43.97881       | 2.05722 | 1 4 3  | 0.00     |
| 155 | 44.03816       | 2.05459 | 3 2 -4 | 0.00     |
| 156 | 44.06658       | 2.05333 | 1 3 4  | 3.40     |
| 157 | 44.13033       | 2.05051 | 1 0 5  | 0.00     |
| 158 | 44.17083       | 2.04872 | 3 4 1  | 7.10     |
| 159 | 44.20603       | 2.04717 | 4 2 -3 | 0.00     |
| 160 | 44.21287       | 2.04687 | 2 0 -5 | 0.00     |
| 161 | 44.26105       | 2.04476 | 1 5 -1 | 0.00     |
| 162 | 44.42551       | 2.03757 | 4 3 1  | 2.10     |
| 163 | 44.60155       | 2.02993 | 1 5 1  | 0.00     |
| 164 | 44.65845       | 2.02748 | 3 0 4  | 1.50     |
| 165 | 44.66021       | 2.02740 | 2 3 -4 | 0.00     |
| 166 | 44.70288       | 2.02557 | 5 0 1  | 0.00     |
| 167 | 44.71343       | 2.02511 | 5 0 -2 | 0.00     |
| 168 | 44.82448       | 2.02035 | 4 0 3  | 0.00     |
| 169 | 44.94454       | 2.01524 | 4 3 -2 | 2.90     |
| 170 | 44.99500       | 2.01309 | 1 1 5  | 12.90    |

**Rosickyite, syn**

| No. | 2 $\theta$ , ° | d, Å    | h k l  | Norm. I. |
|-----|----------------|---------|--------|----------|
| 1   | 18.00483       | 4.92278 | 1 2 -1 | 1.20     |
| 2   | 18.21081       | 4.86756 | 0 2 1  | 0.20     |
| 3   | 18.97952       | 4.67211 | 1 2 0  | 0.30     |
| 4   | 19.48075       | 4.55301 | 1 0 -2 | 0.50     |

**Rosickyite, syn**

| No. | 2 $\theta$ , ° | d, Å    | h k l  | Norm. I. |
|-----|----------------|---------|--------|----------|
| 5   | 20.68360       | 4.29087 | 1 1 -2 | 0.00     |
| 6   | 20.75181       | 4.27692 | 0 3 0  | 67.10    |
| 7   | 22.67439       | 3.91843 | 2 1 -1 | 0.30     |
| 8   | 23.15318       | 3.83848 | 2 0 -2 | 0.00     |
| 9   | 23.16754       | 3.83613 | 1 1 1  | 13.50    |
| 10  | 23.79594       | 3.73623 | 1 3 -1 | 9.90     |
| 11  | 23.79605       | 3.73621 | 0 0 2  | 0.00     |
| 12  | 23.94721       | 3.71297 | 1 2 -2 | 13.00    |
| 13  | 23.95411       | 3.71192 | 0 3 1  | 0.00     |
| 14  | 24.18204       | 3.67744 | 2 1 -2 | 100.00   |
| 15  | 24.55088       | 3.62302 | 1 3 0  | 61.90    |
| 16  | 24.79978       | 3.58722 | 0 1 2  | 95.80    |
| 17  | 25.69893       | 3.46372 | 2 2 -1 | 2.00     |
| 18  | 26.11992       | 3.40884 | 2 0 0  | 0.00     |
| 19  | 26.13833       | 3.40648 | 1 2 1  | 39.80    |
| 20  | 27.04293       | 3.29455 | 2 1 0  | 6.20     |
| 21  | 27.04833       | 3.29390 | 2 2 -2 | 0.00     |
| 22  | 27.60616       | 3.22859 | 0 2 2  | 9.40     |
| 23  | 27.78968       | 3.20769 | 0 4 0  | 14.70    |
| 24  | 28.61260       | 3.11728 | 1 3 -2 | 59.50    |
| 25  | 29.65263       | 3.01027 | 2 2 0  | 45.50    |
| 26  | 30.11239       | 2.96534 | 2 3 -1 | 0.00     |
| 27  | 30.17101       | 2.95972 | 1 4 -1 | 18.70    |
| 28  | 30.29815       | 2.94759 | 0 4 1  | 11.30    |
| 29  | 30.49304       | 2.92919 | 1 3 1  | 9.80     |
| 30  | 30.76412       | 2.90399 | 2 1 -3 | 6.10     |
| 31  | 30.78056       | 2.90248 | 1 4 0  | 0.00     |
| 32  | 31.13756       | 2.87001 | 1 1 -3 | 7.40     |
| 33  | 31.28652       | 2.85669 | 2 3 -2 | 0.00     |
| 34  | 31.77620       | 2.81377 | 0 3 2  | 1.30     |
| 35  | 32.31760       | 2.76786 | 3 0 -2 | 1.40     |
| 36  | 33.08211       | 2.70562 | 3 1 -2 | 0.00     |
| 37  | 33.10668       | 2.70367 | 2 2 -3 | 9.80     |
| 38  | 33.26332       | 2.69129 | 1 0 2  | 1.00     |
| 39  | 33.45667       | 2.67618 | 1 2 -3 | 2.30     |
| 40  | 33.59199       | 2.66571 | 2 3 0  | 0.00     |
| 41  | 34.00894       | 2.63398 | 1 1 2  | 0.80     |
| 42  | 34.16553       | 2.62226 | 1 4 -2 | 0.90     |
| 43  | 34.74442       | 2.57988 | 3 1 -1 | 2.80     |

**Rosickyite, syn**

| No. | 2 $\theta$ , ° | d, Å    | h k l  | Norm. I. |
|-----|----------------|---------|--------|----------|
| 44  | 34.93632       | 2.56615 | 0 5 0  | 0.00     |
| 45  | 35.28748       | 2.54142 | 3 2 -2 | 0.00     |
| 46  | 35.30218       | 2.54039 | 2 1 1  | 13.00    |
| 47  | 35.45376       | 2.52988 | 2 4 -1 | 10.80    |
| 48  | 35.75041       | 2.50956 | 3 1 -3 | 0.00     |
| 49  | 35.78355       | 2.50731 | 1 4 1  | 9.50     |
| 50  | 36.16461       | 2.48176 | 1 2 2  | 5.70     |
| 51  | 36.47446       | 2.46139 | 2 4 -2 | 4.20     |
| 52  | 36.71560       | 2.44577 | 2 3 -3 | 0.00     |
| 53  | 36.72513       | 2.44516 | 0 1 3  | 6.70     |
| 54  | 36.86254       | 2.43636 | 3 2 -1 | 16.30    |
| 55  | 36.90300       | 2.43378 | 1 5 -1 | 0.00     |
| 56  | 36.90307       | 2.43378 | 0 4 2  | 0.00     |
| 57  | 37.00948       | 2.42702 | 0 5 1  | 2.50     |
| 58  | 37.03566       | 2.42537 | 1 3 -3 | 0.00     |
| 59  | 37.39286       | 2.40302 | 2 2 1  | 0.00     |
| 60  | 37.41480       | 2.40166 | 1 5 0  | 8.10     |
| 61  | 37.81968       | 2.37687 | 3 2 -3 | 6.60     |
| 62  | 38.50631       | 2.33605 | 2 4 0  | 1.30     |
| 63  | 38.71912       | 2.32370 | 3 3 -2 | 3.30     |
| 64  | 38.74967       | 2.32194 | 0 2 3  | 0.00     |
| 65  | 39.53078       | 2.27784 | 1 3 2  | 2.80     |
| 66  | 39.55493       | 2.27651 | 2 0 -4 | 0.00     |
| 67  | 39.62655       | 2.27256 | 3 0 0  | 0.00     |
| 68  | 40.17879       | 2.24259 | 3 3 -1 | 0.60     |
| 69  | 40.19912       | 2.24150 | 2 1 -4 | 0.00     |
| 70  | 40.26978       | 2.23773 | 3 1 0  | 0.00     |
| 71  | 40.31114       | 2.23553 | 1 5 -2 | 2.10     |
| 72  | 40.67243       | 2.21650 | 2 3 1  | 1.50     |
| 73  | 41.07046       | 2.19593 | 3 3 -3 | 0.40     |
| 74  | 41.30958       | 2.18377 | 2 4 -3 | 2.20     |
| 75  | 41.41374       | 2.17852 | 3 0 -4 | 1.30     |
| 76  | 41.43492       | 2.17746 | 2 5 -1 | 0.00     |
| 77  | 41.59969       | 2.16921 | 1 4 -3 | 5.90     |
| 78  | 41.72431       | 2.16302 | 1 5 1  | 0.00     |
| 79  | 41.93993       | 2.15240 | 0 3 3  | 5.10     |
| 80  | 42.03430       | 2.14778 | 3 1 -4 | 0.00     |
| 81  | 42.08249       | 2.14543 | 2 2 -4 | 1.20     |
| 82  | 42.15055       | 2.14213 | 3 2 0  | 1.40     |

**Rosickyite, syn**

| No. | 2 $\theta$ , ° | d, Å    | h k l  | Norm. I. |
|-----|----------------|---------|--------|----------|
| 83  | 42.18217       | 2.14059 | 1 0 -4 | 0.00     |
| 84  | 42.22630       | 2.13846 | 0 6 0  | 0.00     |
| 85  | 42.33277       | 2.13333 | 2 5 -2 | 0.30     |
| 86  | 42.71166       | 2.11528 | 0 5 2  | 0.10     |
| 87  | 42.79365       | 2.11141 | 1 1 -4 | 0.00     |
| 88  | 43.13350       | 2.09556 | 3 4 -2 | 0.00     |
| 89  | 43.85308       | 2.06283 | 3 2 -4 | 0.00     |
| 90  | 43.87747       | 2.06174 | 1 4 2  | 4.60     |
| 91  | 43.91575       | 2.06003 | 1 6 -1 | 0.00     |
| 92  | 43.97230       | 2.05751 | 4 0 -2 | 0.00     |
| 93  | 44.00798       | 2.05593 | 0 6 1  | 0.00     |
| 94  | 44.13808       | 2.05017 | 2 5 0  | 0.30     |
| 95  | 44.35968       | 2.04044 | 1 6 0  | 1.80     |
| 96  | 44.47340       | 2.03549 | 3 4 -1 | 0.00     |
| 97  | 44.53710       | 2.03272 | 4 1 -3 | 0.00     |
| 98  | 44.56399       | 2.03156 | 4 1 -2 | 3.30     |
| 99  | 44.58745       | 2.03054 | 1 2 -4 | 0.00     |
| 100 | 44.92847       | 2.01592 | 2 4 1  | 1.40     |

**?-S8**

| No. | 2 $\theta$ , ° | d, Å    | h k l  | Norm. I. |
|-----|----------------|---------|--------|----------|
| 1   | 16.14523       | 5.48535 | 2 0 0  | 0.00     |
| 2   | 16.16429       | 5.47892 | 0 2 0  | 11.20    |
| 3   | 16.35012       | 5.41707 | 0 0 2  | 15.80    |
| 4   | 17.48064       | 5.06920 | 1 0 -2 | 0.90     |
| 5   | 18.07028       | 4.90509 | 2 1 0  | 0.00     |
| 6   | 18.08310       | 4.90164 | 1 2 0  | 22.20    |
| 7   | 18.12921       | 4.88928 | 0 2 1  | 0.00     |
| 8   | 18.25418       | 4.85609 | 0 1 2  | 0.00     |
| 9   | 18.98913       | 4.66976 | 1 0 2  | 0.00     |
| 10  | 19.14603       | 4.63185 | 2 1 -1 | 57.10    |
| 11  | 19.27669       | 4.60075 | 1 1 -2 | 46.50    |
| 12  | 19.51454       | 4.54520 | 1 2 -1 | 41.00    |
| 13  | 20.20919       | 4.39051 | 1 2 1  | 0.80     |
| 14  | 20.53673       | 4.32122 | 2 1 1  | 0.60     |
| 15  | 20.65893       | 4.29594 | 1 1 2  | 2.20     |
| 16  | 21.81978       | 4.06994 | 2 0 -2 | 23.70    |
| 17  | 22.92327       | 3.87645 | 2 2 0  | 0.00     |
| 18  | 23.07000       | 3.85213 | 0 2 2  | 75.90    |

?-S8

| No. | 2 $\theta$ , ° | d, Å    | h k l  | Norm. I. |
|-----|----------------|---------|--------|----------|
| 19  | 23.29594       | 3.81528 | 2 1 -2 | 75.30    |
| 20  | 23.78912       | 3.73728 | 2 2 -1 | 85.20    |
| 21  | 23.89548       | 3.72089 | 1 2 -2 | 55.90    |
| 22  | 24.23338       | 3.66977 | 2 0 2  | 53.20    |
| 23  | 24.31997       | 3.65690 | 3 0 0  | 29.90    |
| 24  | 24.93345       | 3.56829 | 2 2 1  | 100.00   |
| 25  | 25.03524       | 3.55401 | 1 2 2  | 34.30    |
| 26  | 25.57805       | 3.47981 | 2 1 2  | 0.00     |
| 27  | 25.66038       | 3.46883 | 3 1 0  | 0.00     |
| 28  | 25.68487       | 3.46558 | 1 3 0  | 0.00     |
| 29  | 25.71791       | 3.46120 | 0 3 1  | 86.70    |
| 30  | 25.95664       | 3.42991 | 0 1 3  | 0.00     |
| 31  | 26.17575       | 3.40169 | 3 1 -1 | 22.20    |
| 32  | 26.43446       | 3.36898 | 1 1 -3 | 96.70    |
| 33  | 26.72937       | 3.33248 | 1 3 -1 | 0.00     |
| 34  | 27.24941       | 3.27005 | 1 3 1  | 39.00    |
| 35  | 27.27404       | 3.26715 | 2 2 -2 | 0.00     |
| 36  | 27.73767       | 3.21359 | 3 1 1  | 0.00     |
| 37  | 27.97204       | 3.18719 | 3 0 -2 | 82.20    |
| 38  | 27.98300       | 3.18597 | 1 1 3  | 0.00     |
| 39  | 29.15636       | 3.06037 | 3 1 -2 | 3.90     |
| 40  | 29.26729       | 3.04902 | 2 2 2  | 0.00     |
| 41  | 29.30310       | 3.04537 | 2 1 -3 | 8.10     |
| 42  | 29.34003       | 3.04162 | 3 2 0  | 11.30    |
| 43  | 29.35355       | 3.04025 | 2 3 0  | 0.00     |
| 44  | 29.47028       | 3.02848 | 0 3 2  | 0.00     |
| 45  | 29.60219       | 3.01528 | 0 2 3  | 3.30     |
| 46  | 29.79651       | 2.99606 | 3 2 -1 | 13.80    |
| 47  | 30.02642       | 2.97364 | 1 2 -3 | 0.00     |
| 48  | 30.04637       | 2.97171 | 2 3 -1 | 11.10    |
| 49  | 30.13213       | 2.96345 | 1 3 -2 | 0.00     |
| 50  | 30.85568       | 2.89558 | 3 0 2  | 7.00     |
| 51  | 30.97608       | 2.88460 | 2 3 1  | 7.40     |
| 52  | 31.05951       | 2.87704 | 1 3 2  | 5.10     |
| 53  | 31.19180       | 2.86514 | 3 2 1  | 2.20     |
| 54  | 31.41247       | 2.84552 | 1 2 3  | 3.20     |
| 55  | 31.94258       | 2.79949 | 3 1 2  | 0.00     |
| 56  | 32.07776       | 2.78800 | 2 1 3  | 10.70    |
| 57  | 32.47306       | 2.75496 | 3 2 -2 | 2.70     |

?-S8

| No. | 2 $\theta$ , ° | d, Å    | h k l  | Norm. I. |
|-----|----------------|---------|--------|----------|
| 58  | 32.60628       | 2.74401 | 2 2 -3 | 6.30     |
| 59  | 32.62261       | 2.74267 | 4 0 0  | 0.00     |
| 60  | 32.66194       | 2.73946 | 0 4 0  | 0.00     |
| 61  | 32.92222       | 2.71839 | 2 3 -2 | 0.00     |
| 62  | 33.04551       | 2.70853 | 0 0 4  | 9.10     |
| 63  | 33.21552       | 2.69506 | 1 0 -4 | 4.50     |
| 64  | 33.65842       | 2.66060 | 4 1 0  | 0.00     |
| 65  | 33.69429       | 2.65785 | 1 4 0  | 0.00     |
| 66  | 33.72011       | 2.65587 | 0 4 1  | 24.70    |
| 67  | 33.85145       | 2.64587 | 4 1 -1 | 28.00    |
| 68  | 34.01190       | 2.63375 | 3 1 -3 | 0.00     |
| 69  | 34.06992       | 2.62940 | 0 1 4  | 0.00     |
| 70  | 34.23544       | 2.61707 | 1 1 -4 | 1.30     |
| 71  | 34.51693       | 2.59637 | 1 4 -1 | 11.10    |
| 72  | 34.62055       | 2.58883 | 2 3 2  | 0.00     |
| 73  | 34.68315       | 2.58430 | 3 3 0  | 12.80    |
| 74  | 34.90124       | 2.56865 | 1 0 4  | 0.00     |
| 75  | 34.90917       | 2.56809 | 0 3 3  | 1.50     |
| 76  | 34.93125       | 2.56651 | 1 4 1  | 0.00     |
| 77  | 35.02225       | 2.56005 | 3 2 2  | 0.00     |
| 78  | 35.07706       | 2.55618 | 3 3 -1 | 1.10     |
| 79  | 35.08746       | 2.55544 | 4 0 -2 | 0.00     |
| 80  | 35.14691       | 2.55126 | 2 2 3  | 0.00     |
| 81  | 35.27606       | 2.54221 | 1 3 -3 | 0.50     |
| 82  | 35.38553       | 2.53460 | 2 0 -4 | 0.40     |
| 83  | 35.51059       | 2.52596 | 4 1 1  | 0.30     |
| 84  | 35.87902       | 2.50086 | 1 1 4  | 0.00     |
| 85  | 36.06084       | 2.48867 | 4 1 -2 | 0.50     |
| 86  | 36.29087       | 2.47342 | 3 3 1  | 0.00     |
| 87  | 36.35197       | 2.46940 | 2 1 -4 | 1.20     |
| 88  | 36.48413       | 2.46076 | 1 3 3  | 0.50     |
| 89  | 36.61061       | 2.45255 | 4 2 0  | 0.00     |
| 90  | 36.63728       | 2.45082 | 2 4 0  | 0.00     |
| 91  | 36.73323       | 2.44464 | 0 4 2  | 0.00     |
| 92  | 36.79007       | 2.44099 | 4 2 -1 | 6.50     |
| 93  | 36.93937       | 2.43147 | 3 2 -3 | 0.00     |
| 94  | 36.99338       | 2.42804 | 0 2 4  | 2.10     |
| 95  | 37.14753       | 2.41832 | 1 2 -4 | 0.00     |
| 96  | 37.20868       | 2.41449 | 2 4 -1 | 5.60     |

?-S8

| No. | 2 $\theta$ , ° | d, Å    | h k l  | Norm. I. |
|-----|----------------|---------|--------|----------|
| 97  | 37.27972       | 2.41005 | 1 4 -2 | 0.00     |
| 98  | 37.41759       | 2.40149 | 3 3 -2 | 3.60     |
| 99  | 37.53536       | 2.39422 | 2 3 -3 | 0.90     |
| 100 | 37.64132       | 2.38772 | 3 1 3  | 0.90     |
| 101 | 37.98237       | 2.36706 | 2 4 1  | 4.40     |
| 102 | 38.05218       | 2.36288 | 1 4 2  | 0.00     |
| 103 | 38.24947       | 2.35115 | 4 0 2  | 4.40     |
| 104 | 38.33860       | 2.34589 | 4 2 1  | 3.00     |
| 105 | 38.52640       | 2.33488 | 2 0 4  | 1.10     |
| 106 | 38.68383       | 2.32574 | 1 2 4  | 3.00     |
| 107 | 38.85438       | 2.31592 | 4 2 -2 | 1.10     |
| 108 | 39.12770       | 2.30037 | 2 2 -4 | 4.50     |
| 109 | 39.15510       | 2.29883 | 4 1 2  | 0.00     |
| 110 | 39.26634       | 2.29257 | 3 0 -4 | 0.00     |
| 111 | 39.42667       | 2.28362 | 2 1 4  | 4.30     |
| 112 | 39.62572       | 2.27260 | 2 4 -2 | 0.00     |
| 113 | 39.68978       | 2.26908 | 3 3 2  | 10.80    |
| 114 | 39.80185       | 2.26295 | 2 3 3  | 3.10     |
| 115 | 39.99684       | 2.25237 | 4 1 -3 | 1.40     |
| 116 | 40.15266       | 2.24398 | 3 1 -4 | 2.00     |
| 117 | 40.34148       | 2.23392 | 3 2 3  | 0.30     |
| 118 | 41.08368       | 2.19526 | 2 4 2  | 0.00     |
| 119 | 41.10557       | 2.19414 | 5 0 0  | 0.00     |
| 120 | 41.12371       | 2.19321 | 4 3 0  | 3.60     |
| 121 | 41.13782       | 2.19249 | 3 4 0  | 0.00     |
| 122 | 41.28653       | 2.18494 | 4 3 -1 | 0.00     |
| 123 | 41.33350       | 2.18256 | 0 4 3  | 2.30     |
| 124 | 41.42209       | 2.17810 | 3 3 -3 | 0.00     |
| 125 | 41.47115       | 2.17564 | 0 3 4  | 0.00     |
| 126 | 41.47906       | 2.17524 | 3 4 -1 | 0.00     |
| 127 | 41.61127       | 2.16863 | 1 3 -4 | 2.50     |
| 128 | 41.65186       | 2.16661 | 1 4 -3 | 0.00     |
| 129 | 41.77300       | 2.16061 | 4 2 2  | 1.10     |
| 130 | 41.94353       | 2.15222 | 5 1 -1 | 0.00     |
| 131 | 41.95961       | 2.15143 | 5 1 0  | 0.00     |
| 132 | 42.00718       | 2.14911 | 1 5 0  | 0.00     |
| 133 | 42.02859       | 2.14806 | 0 5 1  | 0.00     |
| 134 | 42.03050       | 2.14797 | 2 2 4  | 12.30    |
| 135 | 42.45557       | 2.12744 | 1 1 -5 | 0.00     |

**Supporting Information File S2:**

Modelling of  $\gamma$ -sulfur contribution to microstructure after exposure to hexanes at  $-25\text{ }^{\circ}\text{C}$



?-S8

| No. | 2 $\theta$ , ° | d, Å    | h k l  | Norm. I. |
|-----|----------------|---------|--------|----------|
| 136 | 42.49271       | 2.12567 | 0 1 5  | 4.30     |
| 137 | 42.53704       | 2.12355 | 3 4 1  | 0.00     |
| 138 | 42.57178       | 2.12190 | 4 2 -3 | 0.00     |
| 139 | 42.69191       | 2.11621 | 1 5 -1 | 0.00     |
| 140 | 42.69761       | 2.11594 | 4 3 1  | 0.00     |
| 141 | 42.70635       | 2.11553 | 1 4 3  | 3.50     |
| 142 | 42.71985       | 2.11489 | 3 2 -4 | 0.00     |
| 143 | 42.80636       | 2.11082 | 5 0 -2 | 0.00     |
| 144 | 43.01366       | 2.10112 | 1 3 4  | 1.80     |
| 145 | 43.03883       | 2.09995 | 1 5 1  | 0.00     |
| 146 | 43.16999       | 2.09387 | 4 3 -2 | 0.00     |
| 147 | 43.42076       | 2.08236 | 2 3 -4 | 0.80     |
| 148 | 43.52732       | 2.07751 | 3 4 -2 | 0.00     |
| 149 | 43.54921       | 2.07652 | 3 0 4  | 0.00     |
| 150 | 43.63127       | 2.07280 | 2 4 -3 | 5.40     |
| 151 | 43.63327       | 2.07271 | 5 1 -2 | 0.00     |
| 152 | 43.67999       | 2.07060 | 5 1 1  | 0.00     |
| 153 | 44.06768       | 2.05328 | 2 1 -5 | 0.00     |
| 154 | 44.17576       | 2.04851 | 1 1 5  | 0.00     |
| 155 | 44.22137       | 2.04650 | 4 1 3  | 7.30     |
| 156 | 44.36502       | 2.04021 | 3 1 4  | 0.00     |
| 157 | 44.42605       | 2.03755 | 5 2 -1 | 0.00     |
| 158 | 44.44141       | 2.03688 | 5 2 0  | 0.00     |
| 159 | 44.48116       | 2.03515 | 2 5 0  | 0.00     |
| 160 | 44.48530       | 2.03497 | 4 0 -4 | 6.00     |
| 161 | 44.53811       | 2.03268 | 3 3 3  | 6.20     |
| 162 | 44.56291       | 2.03160 | 0 5 2  | 0.00     |
| 163 | 44.91528       | 2.01648 | 1 2 -5 | 0.00     |
| 164 | 44.95079       | 2.01497 | 0 2 5  | 0.00     |
| 165 | 44.96895       | 2.01420 | 2 5 -1 | 3.00     |

SUNBG90\_hexanes\_-25C\_NEW-WPPF report (SUNBG90\_hexanes\_-25C\_NEW)

General information

|                     |                                          |                      |                     |
|---------------------|------------------------------------------|----------------------|---------------------|
| Analysis date       | 2024-01-12 10:19:00                      | Measurement start... | 2023-12-15 12:16:51 |
| Analyst             | Administrator                            | Operator             | Administrator       |
| Sample name         |                                          | Comment              |                     |
| Measured data na... | C:\XRD Data\Kolis\Bhakti\SUNBG90_hexa... | Memo                 |                     |

WPPF analysis results

| Phase / Dataset |                                  | SUN      |
|-----------------|----------------------------------|----------|
| ▲               | Rwp, %                           | 0.00     |
|                 | Rp, %                            | 0.00     |
|                 | S                                | 0.0000   |
|                 | $\chi^2$                         | 0.0000   |
| ▲               | Sulfur, syn                      |          |
|                 | Weight fraction, wt%             | 94.0(18) |
|                 | a, Å                             | 10.48604 |
|                 | b, Å                             | 12.88756 |
|                 | c, Å                             | 24.55615 |
|                 | $\alpha$ , °                     | 90.000   |
|                 | $\beta$ , °                      | 90.000   |
|                 | $\gamma$ , °                     | 90.000   |
|                 | Lattice volume, Å <sup>3</sup>   | 3318.503 |
|                 | Size, Å                          | 0.0      |
|                 | Strain, %                        | 0.074(5) |
| ▲               | rosickyite low, cyclo-octasulfur |          |
|                 | Weight fraction, wt%             | 2.5(10)  |
|                 | a, Å                             | 10.88800 |
|                 | b, Å                             | 10.90994 |
|                 | c, Å                             | 11.03884 |
|                 | $\alpha$ , °                     | 90.000   |
|                 | $\beta$ , °                      | 95.637   |
|                 | $\gamma$ , °                     | 90.000   |
|                 | Lattice volume, Å <sup>3</sup>   | 1304.934 |
|                 | Size, Å                          | 0.0      |
|                 | Strain, %                        | 0.034(3) |
| ▲               | Rosickyite, syn                  |          |
|                 | Weight fraction, wt%             | 0.7(12)  |
|                 | a, Å                             | 8.30820  |
|                 | b, Å                             | 12.82538 |
|                 | c, Å                             | 9.10610  |
|                 | $\alpha$ , °                     | 90.000   |
|                 | $\beta$ , °                      | 124.890  |
|                 | $\gamma$ , °                     | 90.000   |
|                 | Lattice volume, Å <sup>3</sup>   | 795.896  |
|                 | Size, Å                          | 0.0      |

WPPF analysis results

| Phase / Dataset      |  | SUN      |
|----------------------|--|----------|
| Rosickyite, syn      |  |          |
| Strain, %            |  | 0.034(3) |
| ?-S8                 |  |          |
| Weight fraction, wt% |  | 2.8(11)  |
| a, Å                 |  | 11.04028 |
| b, Å                 |  | 10.96854 |
| c, Å                 |  | 10.90286 |
| α, °                 |  | 90.000   |
| β, °                 |  | 95.920   |
| γ, °                 |  | 90.000   |
| Lattice volume, Å³   |  | 1313.250 |
| Size, Å              |  | 0.0      |
| Strain, %            |  | 0.034(3) |

WPPF weight fraction

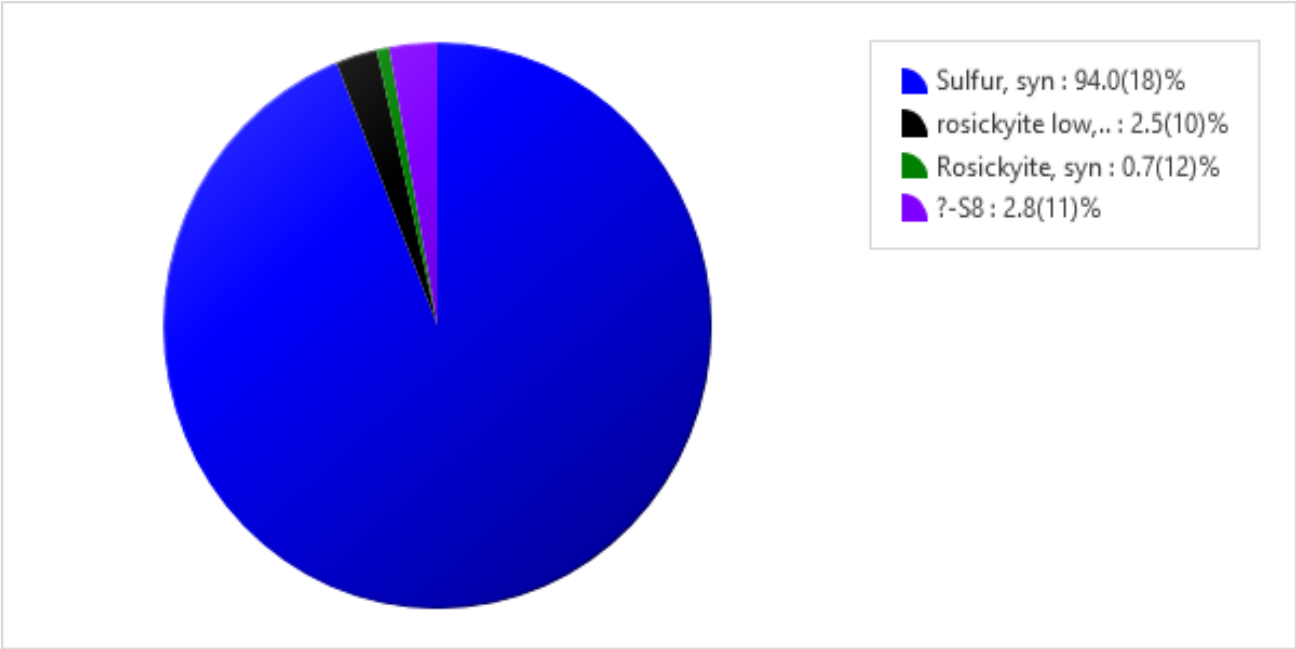

## WPPF Profile View

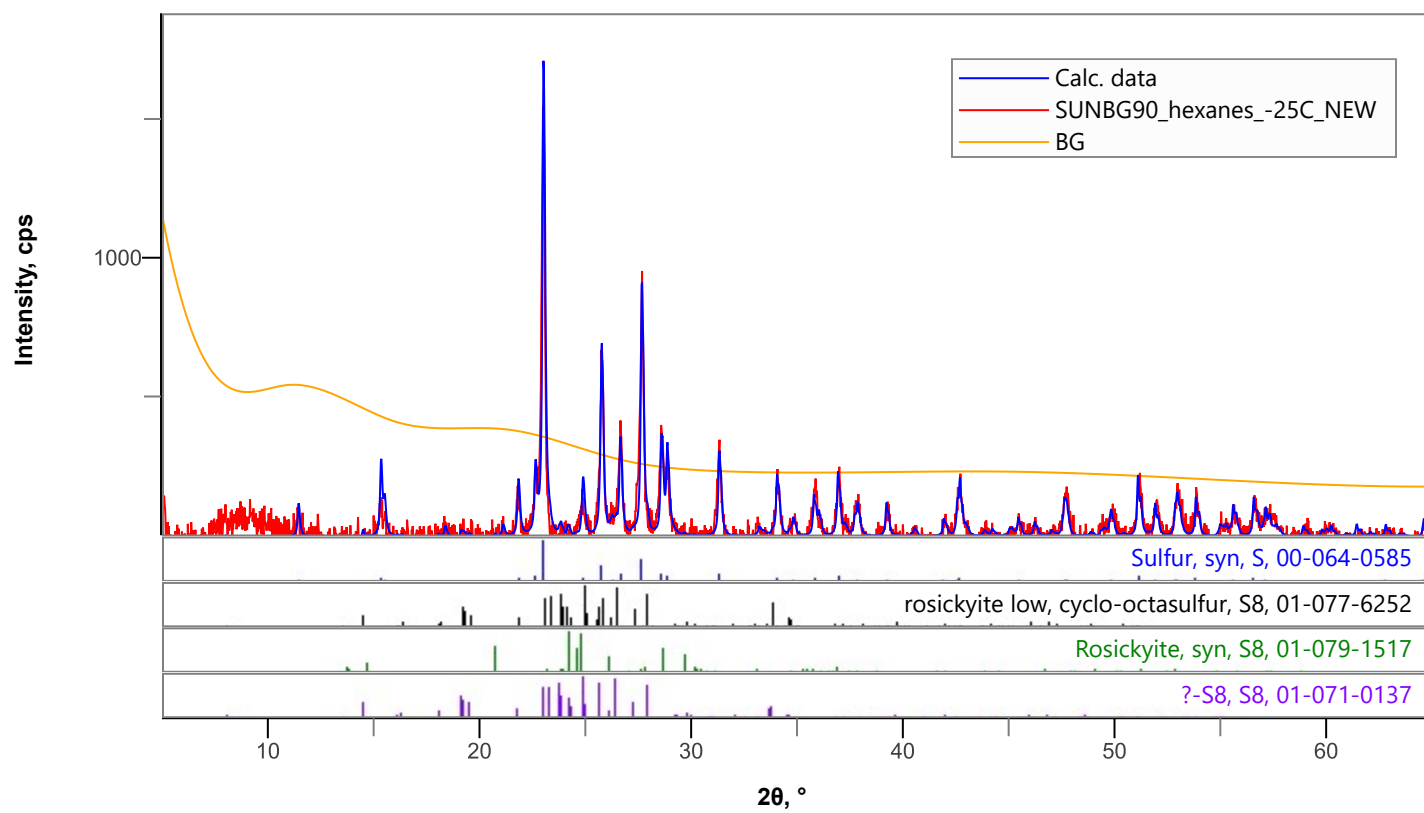

**Lattice parameters**

| Phase name           | a, Å     | b, Å     | c, Å     | $\alpha$ , ° | $\beta$ , ° | $\gamma$ , ° |
|----------------------|----------|----------|----------|--------------|-------------|--------------|
| Sulfur, syn          | 10.48604 | 12.88756 | 24.55615 | 90.000       | 90.000      | 90.000       |
| rosickyite low, c... | 10.88800 | 10.90994 | 11.03884 | 90.000       | 95.637      | 90.000       |
| Rosickyite, syn      | 8.30820  | 12.82538 | 9.10610  | 90.000       | 124.890     | 90.000       |
| ?-S8                 | 11.04028 | 10.96854 | 10.90286 | 90.000       | 95.920      | 90.000       |

**d-I List**

---

**Sulfur, syn**

| No. | 2 $\theta$ , ° | d, Å    | h k l  | Norm. I. |
|-----|----------------|---------|--------|----------|
| 1   | 11.45112       | 7.72122 | 1 1 1  | 6.20     |
| 2   | 14.41639       | 6.13904 | 0 0 4  | 0.00     |
| 3   | 15.34488       | 5.76960 | 1 1 3  | 14.60    |
| 4   | 15.51770       | 5.70573 | 0 2 2  | 6.20     |
| 5   | 18.38513       | 4.82179 | 2 0 2  | 2.30     |
| 6   | 21.11450       | 4.20426 | 1 1 5  | 2.40     |
| 7   | 21.83640       | 4.06688 | 2 2 0  | 11.30    |
| 8   | 22.64113       | 3.92412 | 1 3 1  | 14.20    |
| 9   | 23.01863       | 3.86061 | 2 2 2  | 100.00   |
| 10  | 24.88011       | 3.57582 | 1 3 3  | 10.10    |
| 11  | 25.76667       | 3.45476 | 0 2 6  | 41.00    |
| 12  | 26.26438       | 3.39041 | 2 2 4  | 3.30     |
| 13  | 26.65114       | 3.34208 | 3 1 1  | 21.30    |
| 14  | 27.62741       | 3.22616 | 2 0 6  | 0.00     |
| 15  | 27.66476       | 3.22189 | 0 4 0  | 56.70    |
| 16  | 27.67080       | 3.22120 | 1 1 7  | 0.00     |
| 17  | 28.59674       | 3.11897 | 3 1 3  | 21.50    |
| 18  | 28.87182       | 3.08988 | 1 3 5  | 19.10    |
| 19  | 29.06750       | 3.06952 | 0 0 8  | 1.10     |
| 20  | 30.97391       | 2.88480 | 2 2 6  | 0.00     |
| 21  | 31.32949       | 2.85287 | 0 4 4  | 19.60    |
| 22  | 32.16461       | 2.78067 | 3 1 5  | 0.00     |
| 23  | 33.21783       | 2.69488 | 3 3 1  | 2.10     |
| 24  | 33.42191       | 2.67889 | 2 4 2  | 1.10     |
| 25  | 34.05810       | 2.63029 | 1 3 7  | 13.90    |
| 26  | 34.17563       | 2.62151 | 4 0 0  | 2.00     |
| 27  | 34.64861       | 2.58680 | 1 1 9  | 0.70     |
| 28  | 34.83004       | 2.57374 | 3 3 3  | 4.10     |
| 29  | 35.80417       | 2.50592 | 2 4 4  | 9.60     |
| 30  | 36.03931       | 2.49010 | 1 5 1  | 4.90     |
| 31  | 36.64992       | 2.45001 | 2 2 8  | 0.00     |
| 32  | 36.93763       | 2.43158 | 3 1 7  | 15.10    |
| 33  | 37.26613       | 2.41090 | 4 0 4  | 2.30     |
| 34  | 37.54552       | 2.39360 | 1 5 3  | 0.00     |
| 35  | 37.73335       | 2.38211 | 4 2 2  | 4.50     |
| 36  | 37.87408       | 2.37358 | 3 3 5  | 6.20     |
| 37  | 39.22943       | 2.29464 | 0 2 10 | 8.10     |
| 38  | 39.49670       | 2.27973 | 2 4 6  | 0.00     |
| 39  | 39.89230       | 2.25803 | 4 2 4  | 0.00     |

**Sulfur, syn**

| No. | 2 $\theta$ , ° | d, Å    | h k l  | Norm. I. |
|-----|----------------|---------|--------|----------|
| 40  | 40.04904       | 2.24955 | 1 3 9  | 0.00     |
| 41  | 40.41386       | 2.23008 | 1 5 5  | 0.50     |
| 42  | 40.53318       | 2.22379 | 2 0 10 | 0.00     |
| 43  | 40.55984       | 2.22239 | 0 4 8  | 2.00     |
| 44  | 41.93236       | 2.15277 | 1 1 11 | 3.90     |
| 45  | 42.08684       | 2.14522 | 3 3 7  | 0.60     |
| 46  | 42.58163       | 2.12143 | 3 1 9  | 7.80     |
| 47  | 42.70068       | 2.11579 | 0 6 2  | 9.00     |
| 48  | 42.99194       | 2.10213 | 2 2 10 | 2.20     |
| 49  | 43.29009       | 2.08834 | 4 2 6  | 0.00     |
| 50  | 43.75751       | 2.06711 | 3 5 1  | 0.00     |
| 51  | 43.85679       | 2.06266 | 5 1 1  | 1.50     |
| 52  | 44.22488       | 2.04635 | 0 0 12 | 0.00     |
| 53  | 44.22904       | 2.04616 | 2 4 8  | 1.70     |
| 54  | 44.42646       | 2.03753 | 1 5 7  | 0.00     |
| 55  | 44.52055       | 2.03344 | 4 4 0  | 0.00     |
| 56  | 45.04677       | 2.01090 | 3 5 3  | 1.80     |
| 57  | 45.14381       | 2.00680 | 5 1 3  | 0.00     |
| 58  | 45.16020       | 2.00611 | 4 4 2  | 1.00     |
| 59  | 45.46318       | 1.99345 | 4 0 8  | 4.60     |
| 60  | 45.60440       | 1.98760 | 2 6 0  | 0.00     |
| 61  | 46.23227       | 1.96206 | 2 6 2  | 3.70     |
| 62  | 46.62472       | 1.94645 | 1 3 11 | 0.00     |
| 63  | 47.03817       | 1.93030 | 4 4 4  | 1.40     |
| 64  | 47.22245       | 1.92320 | 3 3 9  | 0.00     |
| 65  | 47.54265       | 1.91099 | 3 5 5  | 1.90     |
| 66  | 47.63573       | 1.90747 | 5 1 5  | 7.00     |
| 67  | 47.71744       | 1.90440 | 4 2 8  | 4.50     |
| 68  | 47.78376       | 1.90191 | 0 6 6  | 0.00     |
| 69  | 48.07783       | 1.89096 | 2 6 4  | 0.00     |
| 70  | 48.40098       | 1.87909 | 5 3 1  | 0.00     |
| 71  | 48.88336       | 1.86167 | 3 1 11 | 0.90     |
| 72  | 49.36987       | 1.84446 | 1 5 9  | 1.30     |
| 73  | 49.49833       | 1.83997 | 1 1 13 | 1.20     |
| 74  | 49.59627       | 1.83656 | 5 3 3  | 0.40     |
| 75  | 49.78113       | 1.83018 | 2 4 10 | 2.40     |
| 76  | 49.84500       | 1.82798 | 2 2 12 | 5.10     |
| 77  | 50.04761       | 1.82105 | 4 4 6  | 0.00     |
| 78  | 50.42167       | 1.80842 | 1 7 1  | 0.50     |



**Sulfur, syn**

| No. | 2 $\theta$ , ° | d, Å    | h k l  | Norm. I. |
|-----|----------------|---------|--------|----------|
| 79  | 51.04127       | 1.78791 | 2 6 6  | 0.00     |
| 80  | 51.11132       | 1.78562 | 3 5 7  | 15.20    |
| 81  | 51.19956       | 1.78275 | 5 1 7  | 0.00     |
| 82  | 51.58239       | 1.77042 | 1 7 3  | 0.60     |
| 83  | 51.92580       | 1.75952 | 5 3 5  | 8.20     |
| 84  | 52.87205       | 1.73023 | 6 0 2  | 6.30     |
| 85  | 52.96612       | 1.72738 | 0 4 12 | 7.50     |
| 86  | 52.99108       | 1.72663 | 4 2 10 | 0.00     |
| 87  | 53.09903       | 1.72337 | 3 3 11 | 1.60     |
| 88  | 53.67890       | 1.70611 | 1 3 13 | 0.00     |
| 89  | 53.85005       | 1.70109 | 1 7 5  | 10.00    |
| 90  | 54.05228       | 1.69521 | 4 4 8  | 0.00     |
| 91  | 54.14814       | 1.69243 | 0 2 14 | 0.00     |
| 92  | 54.34601       | 1.68674 | 6 2 0  | 0.00     |
| 93  | 54.89919       | 1.67104 | 6 2 2  | 0.40     |
| 94  | 54.99441       | 1.66837 | 2 6 8  | 2.30     |
| 95  | 55.07852       | 1.66602 | 1 5 11 | 1.10     |
| 96  | 55.17292       | 1.66340 | 2 0 14 | 0.00     |
| 97  | 55.28816       | 1.66020 | 5 3 7  | 2.40     |
| 98  | 55.60929       | 1.65137 | 3 5 9  | 7.40     |
| 99  | 55.69253       | 1.64910 | 5 1 9  | 0.90     |
| 100 | 55.72746       | 1.64815 | 3 1 13 | 1.00     |
| 101 | 55.79011       | 1.64645 | 4 6 2  | 0.00     |
| 102 | 56.00524       | 1.64063 | 2 4 12 | 0.00     |
| 103 | 56.53683       | 1.62646 | 6 2 4  | 0.00     |
| 104 | 56.57861       | 1.62536 | 3 7 1  | 9.20     |
| 105 | 56.66091       | 1.62319 | 5 5 1  | 1.70     |
| 106 | 56.90844       | 1.61672 | 0 6 10 | 0.70     |
| 107 | 57.04860       | 1.61308 | 4 0 12 | 1.60     |
| 108 | 57.13118       | 1.61094 | 0 8 0  | 0.00     |
| 109 | 57.13452       | 1.61086 | 1 7 7  | 0.00     |
| 110 | 57.14455       | 1.61060 | 2 2 14 | 6.10     |
| 111 | 57.27408       | 1.60726 | 6 0 6  | 0.00     |
| 112 | 57.36658       | 1.60489 | 1 1 15 | 3.30     |
| 113 | 57.41092       | 1.60376 | 4 6 4  | 0.00     |
| 114 | 57.65281       | 1.59760 | 3 7 3  | 2.40     |
| 115 | 57.73412       | 1.59555 | 5 5 3  | 0.60     |
| 116 | 58.92238       | 1.56617 | 4 4 10 | 2.40     |
| 117 | 58.97933       | 1.56480 | 4 2 12 | 0.60     |

**Sulfur, syn**

| No. | 2 $\theta$ , ° | d, Å    | h k l  | Norm. I. |
|-----|----------------|---------|--------|----------|
| 118 | 59.20014       | 1.55948 | 6 2 6  | 0.00     |
| 119 | 59.25424       | 1.55819 | 0 8 4  | 0.00     |
| 120 | 59.57079       | 1.55066 | 5 3 9  | 0.00     |
| 121 | 59.60426       | 1.54987 | 3 3 13 | 0.00     |
| 122 | 59.76417       | 1.54611 | 3 7 5  | 0.00     |
| 123 | 59.81402       | 1.54494 | 2 6 10 | 1.80     |
| 124 | 59.84369       | 1.54424 | 5 5 5  | 0.00     |
| 125 | 60.04960       | 1.53944 | 4 6 6  | 1.50     |
| 126 | 60.25164       | 1.53476 | 0 0 16 | 2.20     |
| 127 | 60.54924       | 1.52793 | 2 8 2  | 0.00     |
| 128 | 60.70697       | 1.52433 | 6 4 2  | 0.00     |
| 129 | 60.91457       | 1.51963 | 3 5 11 | 0.50     |
| 130 | 60.99319       | 1.51786 | 5 1 11 | 0.40     |
| 131 | 61.17723       | 1.51374 | 1 3 15 | 0.00     |
| 132 | 61.33468       | 1.51023 | 1 7 9  | 0.00     |
| 133 | 61.44584       | 1.50776 | 1 5 13 | 3.20     |
| 134 | 62.09160       | 1.49362 | 2 8 4  | 1.30     |
| 135 | 62.24703       | 1.49027 | 6 4 4  | 0.00     |
| 136 | 62.48033       | 1.48526 | 7 1 1  | 0.00     |
| 137 | 62.81038       | 1.47825 | 6 2 8  | 0.00     |
| 138 | 62.82041       | 1.47804 | 2 4 14 | 3.10     |
| 139 | 62.84957       | 1.47742 | 3 7 7  | 0.00     |
| 140 | 62.92678       | 1.47579 | 5 5 7  | 0.00     |
| 141 | 63.06869       | 1.47282 | 3 1 15 | 0.00     |
| 142 | 63.49287       | 1.46399 | 7 1 3  | 0.80     |
| 143 | 63.63128       | 1.46114 | 4 6 8  | 0.40     |
| 144 | 64.55739       | 1.44240 | 4 4 12 | 0.00     |
| 145 | 64.61495       | 1.44125 | 2 8 6  | 4.00     |
| 146 | 64.67493       | 1.44006 | 5 3 11 | 0.90     |
| 147 | 64.76700       | 1.43824 | 6 4 6  | 1.30     |
| 148 | 64.88469       | 1.43591 | 2 2 16 | 0.00     |

**rosickyite low, cyclo-octasulfur**

| No. | 2 $\theta$ , ° | d, Å     | h k l  | Norm. I. |
|-----|----------------|----------|--------|----------|
| 1   | 8.04172        | 10.98546 | 0 0 1  | 7.20     |
| 2   | 8.15332        | 10.83534 | 1 0 0  | 0.00     |
| 3   | 10.88228       | 8.12351  | 1 0 -1 | 0.10     |
| 4   | 11.42168       | 7.74105  | 0 1 1  | 0.00     |
| 5   | 11.50079       | 7.68798  | 1 1 0  | 1.30     |

## rosickyite low, cyclo-octasulfur

| No. | 2 $\theta$ , ° | d, Å    | h k l  | Norm. I. |
|-----|----------------|---------|--------|----------|
| 6   | 12.01311       | 7.36124 | 1 0 1  | 0.00     |
| 7   | 13.57903       | 6.51567 | 1 1 -1 | 5.00     |
| 8   | 14.50407       | 6.10212 | 1 1 1  | 34.30    |
| 9   | 16.12339       | 5.49273 | 0 0 2  | 8.60     |
| 10  | 16.23575       | 5.45497 | 0 2 0  | 4.30     |
| 11  | 16.34828       | 5.41767 | 2 0 0  | 13.10    |
| 12  | 17.35495       | 5.10562 | 1 0 -2 | 0.10     |
| 13  | 17.51236       | 5.06008 | 2 0 -1 | 0.10     |
| 14  | 18.06677       | 4.90604 | 0 1 2  | 9.50     |
| 15  | 18.14234       | 4.88577 | 0 2 1  | 14.10    |
| 16  | 18.19275       | 4.87235 | 1 2 0  | 0.00     |
| 17  | 18.26844       | 4.85233 | 2 1 0  | 0.00     |
| 18  | 18.80150       | 4.71594 | 1 0 2  | 0.80     |
| 19  | 18.94728       | 4.67998 | 2 0 1  | 0.00     |
| 20  | 19.17758       | 4.62430 | 1 1 -2 | 51.50    |
| 21  | 19.32063       | 4.59038 | 2 1 -1 | 42.40    |
| 22  | 19.58648       | 4.52867 | 1 2 -1 | 32.60    |
| 23  | 20.24535       | 4.38275 | 1 2 1  | 1.00     |
| 24  | 20.50024       | 4.32883 | 1 1 2  | 0.80     |
| 25  | 20.63448       | 4.30097 | 2 1 1  | 2.00     |
| 26  | 21.86428       | 4.06175 | 2 0 -2 | 25.00    |
| 27  | 22.95884       | 3.87053 | 0 2 2  | 0.00     |
| 28  | 23.11951       | 3.84399 | 2 2 0  | 72.60    |
| 29  | 23.35034       | 3.80651 | 2 1 -2 | 73.70    |
| 30  | 23.85178       | 3.72761 | 1 2 -2 | 83.40    |
| 31  | 23.96814       | 3.70977 | 2 2 -1 | 49.90    |
| 32  | 24.16085       | 3.68062 | 2 0 2  | 50.00    |
| 33  | 24.28677       | 3.66182 | 0 0 3  | 23.30    |
| 34  | 24.62849       | 3.61178 | 3 0 0  | 0.00     |
| 35  | 24.86977       | 3.57729 | 1 0 -3 | 0.00     |
| 36  | 24.93858       | 3.56757 | 1 2 2  | 100.00   |
| 37  | 25.05019       | 3.55193 | 2 2 1  | 34.90    |
| 38  | 25.16713       | 3.53569 | 3 0 -1 | 0.00     |
| 39  | 25.52067       | 3.48750 | 2 1 2  | 19.90    |
| 40  | 25.64034       | 3.47150 | 0 1 3  | 52.90    |
| 41  | 25.78467       | 3.45239 | 0 3 1  | 0.00     |
| 42  | 25.82078       | 3.44764 | 1 3 0  | 71.50    |
| 43  | 25.96537       | 3.42877 | 3 1 0  | 0.00     |
| 44  | 26.19513       | 3.39922 | 1 1 -3 | 24.60    |

**rosickyite low, cyclo-octasulfur**

| No. | 2 $\theta$ , ° | d, Å    | h k l  | Norm. I. |
|-----|----------------|---------|--------|----------|
| 45  | 26.42539       | 3.37012 | 1 0 3  | 0.00     |
| 46  | 26.47859       | 3.36347 | 3 1 -1 | 98.20    |
| 47  | 26.70659       | 3.33527 | 3 0 1  | 0.00     |
| 48  | 26.83809       | 3.31922 | 1 3 -1 | 1.90     |
| 49  | 27.33103       | 3.26047 | 1 3 1  | 44.60    |
| 50  | 27.35357       | 3.25783 | 2 2 -2 | 0.00     |
| 51  | 27.68140       | 3.21999 | 1 1 3  | 5.70     |
| 52  | 27.95090       | 3.18955 | 3 1 1  | 78.30    |
| 53  | 28.01580       | 3.18231 | 2 0 -3 | 0.00     |
| 54  | 28.18267       | 3.16385 | 3 0 -2 | 5.40     |
| 55  | 29.20870       | 3.05500 | 2 1 -3 | 0.00     |
| 56  | 29.24725       | 3.05106 | 2 2 2  | 10.60    |
| 57  | 29.35283       | 3.04033 | 0 2 3  | 6.30     |
| 58  | 29.36937       | 3.03865 | 3 1 -2 | 0.00     |
| 59  | 29.43257       | 3.03227 | 0 3 2  | 8.90     |
| 60  | 29.56028       | 3.01946 | 2 3 0  | 0.00     |
| 61  | 29.64017       | 3.01150 | 3 2 0  | 8.00     |
| 62  | 29.84377       | 2.99142 | 1 2 -3 | 15.50    |
| 63  | 30.09552       | 2.96697 | 3 2 -1 | 0.00     |
| 64  | 30.14653       | 2.96206 | 1 3 -2 | 11.50    |
| 65  | 30.24030       | 2.95309 | 2 3 -1 | 0.00     |
| 66  | 30.76021       | 2.90435 | 2 0 3  | 7.20     |
| 67  | 30.91355       | 2.89030 | 3 0 2  | 2.70     |
| 68  | 31.02866       | 2.87984 | 1 3 2  | 6.60     |
| 69  | 31.12003       | 2.87159 | 2 3 1  | 0.00     |
| 70  | 31.17015       | 2.86708 | 1 2 3  | 6.30     |
| 71  | 31.41227       | 2.84554 | 3 2 1  | 4.40     |
| 72  | 31.85949       | 2.80661 | 2 1 3  | 1.30     |
| 73  | 32.00809       | 2.79391 | 3 1 2  | 10.70    |
| 74  | 32.54837       | 2.74876 | 2 2 -3 | 3.50     |
| 75  | 32.57754       | 2.74636 | 0 0 4  | 0.00     |
| 76  | 32.69417       | 2.73683 | 3 2 -2 | 5.90     |
| 77  | 32.80940       | 2.72748 | 0 4 0  | 6.60     |
| 78  | 32.81868       | 2.72673 | 1 0 -4 | 0.00     |
| 79  | 33.03504       | 2.70937 | 2 3 -2 | 0.00     |
| 80  | 33.04172       | 2.70884 | 4 0 0  | 13.60    |
| 81  | 33.05426       | 2.70784 | 3 0 -3 | 0.00     |
| 82  | 33.25122       | 2.69225 | 4 0 -1 | 4.60     |
| 83  | 33.62358       | 2.66328 | 0 1 4  | 9.60     |

**rosickyite low, cyclo-octasulfur**

| No. | 2 $\theta$ , ° | d, Å    | h k l  | Norm. I. |
|-----|----------------|---------|--------|----------|
| 84  | 33.83503       | 2.64712 | 0 4 1  | 0.00     |
| 85  | 33.85811       | 2.64536 | 1 1 -4 | 0.00     |
| 86  | 33.86325       | 2.64497 | 1 4 0  | 60.00    |
| 87  | 34.07513       | 2.62901 | 4 1 0  | 4.60     |
| 88  | 34.08734       | 2.62810 | 3 1 -3 | 0.00     |
| 89  | 34.27904       | 2.61384 | 4 1 -1 | 1.60     |
| 90  | 34.43975       | 2.60201 | 1 0 4  | 5.60     |
| 91  | 34.64715       | 2.58690 | 2 3 2  | 26.30    |
| 92  | 34.66467       | 2.58564 | 1 4 -1 | 0.00     |
| 93  | 34.73793       | 2.58035 | 0 3 3  | 19.10    |
| 94  | 34.85450       | 2.57199 | 4 0 1  | 0.00     |
| 95  | 34.97176       | 2.56363 | 2 2 3  | 3.70     |
| 96  | 34.98545       | 2.56266 | 3 3 0  | 0.00     |
| 97  | 35.05733       | 2.55757 | 1 4 1  | 0.00     |
| 98  | 35.10865       | 2.55395 | 3 2 2  | 0.00     |
| 99  | 35.12482       | 2.55281 | 2 0 -4 | 5.10     |
| 100 | 35.16123       | 2.55025 | 1 3 -3 | 0.00     |
| 101 | 35.37901       | 2.53505 | 3 3 -1 | 1.70     |
| 102 | 35.43723       | 2.53102 | 1 1 4  | 1.60     |
| 103 | 35.45136       | 2.53004 | 4 0 -2 | 0.00     |
| 104 | 35.84190       | 2.50336 | 4 1 1  | 0.00     |
| 105 | 36.10578       | 2.48567 | 2 1 -4 | 3.30     |
| 106 | 36.31402       | 2.47189 | 1 3 3  | 1.10     |
| 107 | 36.42468       | 2.46464 | 4 1 -2 | 3.60     |
| 108 | 36.52584       | 2.45804 | 3 3 1  | 0.00     |
| 109 | 36.59206       | 2.45375 | 3 0 3  | 4.10     |
| 110 | 36.60332       | 2.45302 | 0 2 4  | 0.00     |
| 111 | 36.76055       | 2.44289 | 0 4 2  | 0.00     |
| 112 | 36.82123       | 2.43900 | 1 2 -4 | 8.80     |
| 113 | 36.86549       | 2.43617 | 2 4 0  | 0.00     |
| 114 | 37.02306       | 2.42616 | 4 2 0  | 0.00     |
| 115 | 37.03442       | 2.42545 | 3 2 -3 | 4.70     |
| 116 | 37.21288       | 2.41422 | 4 2 -1 | 8.60     |
| 117 | 37.34919       | 2.40573 | 1 4 -2 | 3.20     |
| 118 | 37.42686       | 2.40091 | 2 4 -1 | 0.00     |
| 119 | 37.52507       | 2.39485 | 2 3 -3 | 7.30     |
| 120 | 37.53983       | 2.39395 | 3 1 3  | 0.00     |
| 121 | 37.65393       | 2.38695 | 3 3 -2 | 2.50     |
| 122 | 38.08295       | 2.36104 | 1 4 2  | 0.00     |

## rosickyite low, cyclo-octasulfur

| No. | 2 $\theta$ , ° | d, Å    | h k l  | Norm. I. |
|-----|----------------|---------|--------|----------|
| 123 | 38.13449       | 2.35797 | 2 0 4  | 9.60     |
| 124 | 38.15934       | 2.35649 | 2 4 1  | 0.00     |
| 125 | 38.29404       | 2.34851 | 1 2 4  | 3.30     |
| 126 | 38.43895       | 2.33999 | 4 0 2  | 1.40     |
| 127 | 38.67296       | 2.32637 | 4 2 1  | 4.60     |
| 128 | 38.92036       | 2.31215 | 2 2 -4 | 3.40     |
| 129 | 39.05029       | 2.30476 | 2 1 4  | 0.90     |
| 130 | 39.17725       | 2.29758 | 3 0 -4 | 0.00     |
| 131 | 39.21965       | 2.29519 | 4 2 -2 | 7.00     |
| 132 | 39.34876       | 2.28796 | 4 1 2  | 6.50     |
| 133 | 39.35111       | 2.28783 | 4 0 -3 | 0.00     |
| 134 | 39.68345       | 2.26943 | 2 3 3  | 14.10    |
| 135 | 39.77647       | 2.26434 | 2 4 -2 | 0.00     |
| 136 | 39.80639       | 2.26270 | 3 3 2  | 5.10     |
| 137 | 40.07296       | 2.24826 | 3 1 -4 | 3.50     |
| 138 | 40.24359       | 2.23912 | 4 1 -3 | 0.00     |
| 139 | 40.26888       | 2.23778 | 3 2 3  | 6.00     |
| 140 | 41.04782       | 2.19709 | 0 0 5  | 0.00     |
| 141 | 41.07530       | 2.19569 | 1 0 -5 | 0.00     |
| 142 | 41.15498       | 2.19162 | 0 3 4  | 0.00     |
| 143 | 41.15972       | 2.19138 | 2 4 2  | 7.00     |
| 144 | 41.23816       | 2.18739 | 0 4 3  | 0.00     |
| 145 | 41.35253       | 2.18160 | 1 3 -4 | 1.30     |
| 146 | 41.45233       | 2.17658 | 3 4 0  | 3.40     |
| 147 | 41.53572       | 2.17240 | 4 3 0  | 0.00     |
| 148 | 41.54603       | 2.17189 | 3 3 -3 | 2.70     |
| 149 | 41.60468       | 2.16896 | 1 4 -3 | 0.00     |
| 150 | 41.64273       | 2.16707 | 5 0 0  | 0.00     |
| 151 | 41.64624       | 2.16689 | 5 0 -1 | 0.00     |
| 152 | 41.69615       | 2.16442 | 2 2 4  | 0.00     |
| 153 | 41.70818       | 2.16382 | 4 3 -1 | 8.00     |
| 154 | 41.79373       | 2.15959 | 3 4 -1 | 0.00     |
| 155 | 41.91029       | 2.15385 | 0 1 5  | 0.00     |
| 156 | 41.93730       | 2.15253 | 1 1 -5 | 0.00     |
| 157 | 41.97896       | 2.15049 | 4 2 2  | 13.70    |
| 158 | 42.19076       | 2.14018 | 0 5 1  | 0.00     |
| 159 | 42.21416       | 2.13905 | 1 5 0  | 5.10     |
| 160 | 42.49531       | 2.12554 | 5 1 0  | 6.40     |
| 161 | 42.49876       | 2.12538 | 5 1 -1 | 0.00     |

**rosickyite low, cyclo-octasulfur**

| No. | 2 $\theta$ , ° | d, Å    | h k l  | Norm. I. |
|-----|----------------|---------|--------|----------|
| 162 | 42.60886       | 2.12014 | 1 4 3  | 0.00     |
| 163 | 42.66617       | 2.11743 | 3 2 -4 | 0.00     |
| 164 | 42.69362       | 2.11613 | 1 3 4  | 3.40     |
| 165 | 42.75519       | 2.11322 | 1 0 5  | 0.00     |
| 166 | 42.79430       | 2.11138 | 3 4 1  | 7.10     |
| 167 | 42.82829       | 2.10979 | 4 2 -3 | 0.00     |
| 168 | 42.83489       | 2.10948 | 2 0 -5 | 0.00     |
| 169 | 42.88142       | 2.10729 | 1 5 -1 | 0.00     |
| 170 | 43.04023       | 2.09989 | 4 3 1  | 2.10     |
| 171 | 43.21022       | 2.09202 | 1 5 1  | 0.00     |
| 172 | 43.26516       | 2.08949 | 3 0 4  | 1.50     |
| 173 | 43.26686       | 2.08941 | 2 3 -4 | 0.00     |
| 174 | 43.30805       | 2.08752 | 5 0 1  | 0.00     |
| 175 | 43.31824       | 2.08705 | 5 0 -2 | 0.00     |
| 176 | 43.42547       | 2.08215 | 4 0 3  | 0.00     |
| 177 | 43.54139       | 2.07687 | 4 3 -2 | 2.90     |
| 178 | 43.59011       | 2.07466 | 1 1 5  | 0.00     |
| 179 | 43.66859       | 2.07112 | 2 1 -5 | 0.00     |
| 180 | 43.67273       | 2.07093 | 2 4 -3 | 6.70     |
| 181 | 43.78644       | 2.06581 | 3 4 -2 | 6.20     |
| 182 | 44.09232       | 2.05219 | 3 1 4  | 0.00     |
| 183 | 44.13458       | 2.05032 | 5 1 1  | 0.00     |
| 184 | 44.14461       | 2.04988 | 5 1 -2 | 10.20    |
| 185 | 44.25024       | 2.04523 | 4 1 3  | 3.60     |
| 186 | 44.41568       | 2.03800 | 0 2 5  | 0.00     |
| 187 | 44.44146       | 2.03687 | 1 2 -5 | 0.00     |
| 188 | 44.50667       | 2.03404 | 3 3 3  | 4.80     |
| 189 | 44.57973       | 2.03088 | 4 0 -4 | 5.70     |
| 190 | 44.65005       | 2.02784 | 0 5 2  | 0.00     |
| 191 | 44.73946       | 2.02400 | 2 5 0  | 8.70     |
| 192 | 44.97444       | 2.01397 | 5 2 0  | 0.00     |
| 193 | 44.97774       | 2.01383 | 5 2 -1 | 4.10     |
| 194 | 45.15255       | 2.00644 | 1 5 -2 | 0.00     |
| 195 | 45.21903       | 2.00364 | 2 5 -1 | 6.00     |
| 196 | 45.38783       | 1.99658 | 4 1 -4 | 3.00     |
| 197 | 45.58960       | 1.98821 | 2 4 3  | 2.10     |
| 198 | 45.69953       | 1.98368 | 3 4 2  | 2.40     |
| 199 | 45.78224       | 1.98029 | 1 5 2  | 0.00     |
| 200 | 45.82661       | 1.97848 | 2 3 4  | 0.00     |

**rosickyite low, cyclo-octasulfur**

| No. | 2 $\theta$ , ° | d, Å    | h k l  | Norm. I. |
|-----|----------------|---------|--------|----------|
| 201 | 45.84800       | 1.97760 | 2 5 1  | 5.80     |
| 202 | 46.02213       | 1.97053 | 1 2 5  | 0.00     |
| 203 | 46.04092       | 1.96977 | 2 0 5  | 16.20    |
| 204 | 46.08903       | 1.96782 | 4 3 2  | 0.00     |
| 205 | 46.09733       | 1.96749 | 2 2 -5 | 0.00     |
| 206 | 46.16616       | 1.96471 | 3 0 -5 | 0.00     |
| 207 | 46.49776       | 1.95147 | 5 0 2  | 0.00     |
| 208 | 46.50359       | 1.95124 | 3 2 4  | 7.30     |
| 209 | 46.51382       | 1.95084 | 5 0 -3 | 0.00     |
| 210 | 46.54412       | 1.94964 | 5 2 1  | 0.00     |
| 211 | 46.55375       | 1.94926 | 5 2 -2 | 0.00     |
| 212 | 46.65509       | 1.94526 | 4 2 3  | 0.00     |
| 213 | 46.72788       | 1.94240 | 3 3 -4 | 3.60     |
| 214 | 46.82929       | 1.93843 | 2 1 5  | 0.00     |
| 215 | 46.87882       | 1.93649 | 4 3 -3 | 0.00     |
| 216 | 46.91040       | 1.93526 | 0 4 4  | 15.50    |
| 217 | 46.95291       | 1.93361 | 3 1 -5 | 0.00     |
| 218 | 47.08852       | 1.92836 | 1 4 -4 | 2.20     |
| 219 | 47.24888       | 1.92219 | 2 5 -2 | 0.00     |
| 220 | 47.25384       | 1.92200 | 4 4 0  | 0.00     |
| 221 | 47.26316       | 1.92164 | 3 4 -3 | 0.00     |
| 222 | 47.28027       | 1.92098 | 5 1 2  | 12.00    |
| 223 | 47.29612       | 1.92038 | 5 1 -3 | 0.00     |
| 224 | 47.40963       | 1.91604 | 4 4 -1 | 0.00     |
| 225 | 47.74790       | 1.90325 | 4 2 -4 | 1.70     |
| 226 | 48.30240       | 1.88269 | 1 4 4  | 0.00     |
| 227 | 48.36135       | 1.88054 | 0 3 5  | 0.00     |
| 228 | 48.38550       | 1.87965 | 1 3 -5 | 0.00     |
| 229 | 48.45971       | 1.87695 | 2 5 2  | 5.30     |
| 230 | 48.52871       | 1.87444 | 0 5 3  | 0.00     |
| 231 | 48.61743       | 1.87123 | 4 4 1  | 3.20     |
| 232 | 48.71725       | 1.86763 | 3 5 0  | 5.60     |
| 233 | 48.82369       | 1.86380 | 2 4 -4 | 0.00     |
| 234 | 48.85153       | 1.86281 | 1 5 -3 | 0.00     |
| 235 | 48.88508       | 1.86161 | 5 3 0  | 0.00     |
| 236 | 48.88817       | 1.86150 | 5 3 -1 | 13.60    |
| 237 | 49.01832       | 1.85686 | 3 5 -1 | 5.30     |
| 238 | 49.07383       | 1.85489 | 4 4 -2 | 0.00     |
| 239 | 49.13614       | 1.85268 | 2 2 5  | 0.00     |



**rosickyite low, cyclo-octasulfur**

| No. | 2 $\theta$ , ° | d, Å    | h k l  | Norm. I. |
|-----|----------------|---------|--------|----------|
| 240 | 49.25537       | 1.84847 | 3 2 -5 | 1.10     |
| 241 | 49.48854       | 1.84031 | 4 0 4  | 0.00     |
| 242 | 49.57122       | 1.83743 | 5 2 2  | 3.10     |
| 243 | 49.58652       | 1.83690 | 5 2 -3 | 0.00     |
| 244 | 49.63636       | 1.83517 | 1 0 -6 | 0.00     |
| 245 | 49.73970       | 1.83160 | 1 5 3  | 1.60     |
| 246 | 49.75984       | 1.83091 | 0 0 6  | 0.00     |
| 247 | 49.86957       | 1.82714 | 1 3 5  | 0.00     |
| 248 | 49.90430       | 1.82595 | 3 5 1  | 2.40     |
| 249 | 49.94036       | 1.82471 | 2 3 -5 | 0.00     |
| 250 | 49.95584       | 1.82418 | 3 4 3  | 0.00     |
| 251 | 50.12798       | 1.81832 | 0 6 0  | 3.30     |
| 252 | 50.23577       | 1.81467 | 4 1 4  | 0.00     |
| 253 | 50.32304       | 1.81173 | 3 3 4  | 0.00     |
| 254 | 50.35464       | 1.81067 | 6 0 -1 | 0.00     |
| 255 | 50.36124       | 1.81045 | 5 3 1  | 10.00    |
| 256 | 50.37032       | 1.81014 | 5 3 -2 | 0.00     |
| 257 | 50.38197       | 1.80975 | 1 1 -6 | 0.00     |
| 258 | 50.46586       | 1.80694 | 4 3 3  | 0.00     |
| 259 | 50.49720       | 1.80589 | 6 0 0  | 0.00     |
| 260 | 50.50411       | 1.80566 | 0 1 6  | 6.70     |
| 261 | 50.66806       | 1.80020 | 3 0 5  | 0.00     |
| 262 | 50.68640       | 1.79959 | 2 5 -3 | 0.00     |
| 263 | 50.78791       | 1.79623 | 3 5 -2 | 0.00     |
| 264 | 50.83122       | 1.79480 | 4 0 -5 | 0.00     |
| 265 | 50.85823       | 1.79391 | 0 6 1  | 6.80     |
| 266 | 50.87849       | 1.79325 | 1 6 0  | 0.00     |
| 267 | 50.99248       | 1.78951 | 5 0 3  | 0.00     |
| 268 | 51.01347       | 1.78882 | 5 0 -4 | 0.00     |
| 269 | 51.01888       | 1.78864 | 2 0 -6 | 0.00     |
| 270 | 51.09259       | 1.78624 | 6 1 -1 | 6.60     |
| 271 | 51.16784       | 1.78378 | 2 4 4  | 8.40     |
| 272 | 51.23366       | 1.78165 | 6 1 0  | 0.00     |
| 273 | 51.38137       | 1.77687 | 1 0 6  | 0.00     |
| 274 | 51.40275       | 1.77618 | 3 1 5  | 0.00     |
| 275 | 51.40959       | 1.77596 | 4 4 2  | 0.00     |
| 276 | 51.45771       | 1.77442 | 1 6 -1 | 0.00     |
| 277 | 51.49791       | 1.77312 | 4 3 -4 | 0.00     |
| 278 | 51.56424       | 1.77100 | 4 1 -5 | 0.00     |

**rosickyite low, cyclo-octasulfur**

| No. | 2 $\theta$ , ° | d, Å    | h k l  | Norm. I. |
|-----|----------------|---------|--------|----------|
| 279 | 51.66307       | 1.76784 | 6 0 -2 | 0.00     |
| 280 | 51.72385       | 1.76591 | 5 1 3  | 0.00     |
| 281 | 51.74409       | 1.76527 | 1 6 1  | 0.00     |
| 282 | 51.74463       | 1.76525 | 5 1 -4 | 0.00     |
| 283 | 51.74999       | 1.76508 | 2 1 -6 | 0.00     |
| 284 | 51.99915       | 1.75721 | 3 4 -4 | 0.00     |
| 285 | 52.08215       | 1.75460 | 6 0 1  | 0.00     |
| 286 | 52.10884       | 1.75376 | 1 1 6  | 0.00     |
| 287 | 52.13866       | 1.75283 | 4 4 -3 | 0.00     |
| 288 | 52.38775       | 1.74508 | 6 1 -2 | 0.00     |
| 289 | 52.40603       | 1.74452 | 2 5 3  | 0.00     |
| 290 | 52.43077       | 1.74375 | 4 2 4  | 0.00     |
| 291 | 52.50516       | 1.74146 | 3 5 2  | 0.00     |
| 292 | 52.57258       | 1.73938 | 1 2 -6 | 0.00     |
| 293 | 52.69107       | 1.73575 | 0 2 6  | 0.00     |
| 294 | 52.80275       | 1.73234 | 6 1 1  | 0.00     |
| 295 | 52.81337       | 1.73202 | 2 3 5  | 0.00     |
| 296 | 52.92657       | 1.72858 | 3 3 -5 | 0.00     |
| 297 | 53.00532       | 1.72620 | 0 6 2  | 0.00     |
| 298 | 53.08401       | 1.72382 | 2 6 0  | 0.00     |
| 299 | 53.22661       | 1.71954 | 5 3 2  | 0.00     |
| 300 | 53.24115       | 1.71910 | 5 3 -3 | 0.00     |
| 301 | 53.26225       | 1.71847 | 6 2 -1 | 0.00     |
| 302 | 53.39925       | 1.71439 | 6 2 0  | 0.00     |
| 303 | 53.44814       | 1.71293 | 1 6 -2 | 0.00     |
| 304 | 53.50683       | 1.71119 | 2 6 -1 | 0.00     |
| 305 | 53.51306       | 1.71101 | 0 4 5  | 0.00     |
| 306 | 53.53551       | 1.71034 | 1 4 -5 | 0.00     |
| 307 | 53.56349       | 1.70952 | 3 2 5  | 0.00     |
| 308 | 53.60063       | 1.70842 | 0 5 4  | 0.00     |
| 309 | 53.72038       | 1.70489 | 4 2 -5 | 0.00     |
| 310 | 53.76231       | 1.70366 | 1 5 -4 | 0.00     |
| 311 | 53.82339       | 1.70187 | 3 0 -6 | 0.00     |
| 312 | 53.87550       | 1.70035 | 5 2 3  | 0.00     |
| 313 | 53.89569       | 1.69976 | 5 2 -4 | 0.00     |
| 314 | 53.90090       | 1.69961 | 2 2 -6 | 0.00     |
| 315 | 53.91249       | 1.69927 | 4 5 0  | 0.00     |
| 316 | 53.92095       | 1.69902 | 3 5 -3 | 0.00     |
| 317 | 54.00034       | 1.69671 | 5 4 0  | 0.00     |

**rosickyite low, cyclo-octasulfur**

| No. | 2 $\theta$ , ° | d, Å    | h k l  | Norm. I. |
|-----|----------------|---------|--------|----------|
| 318 | 54.00322       | 1.69663 | 5 4 -1 | 0.00     |
| 319 | 54.00492       | 1.69658 | 1 6 2  | 0.00     |
| 320 | 54.05411       | 1.69515 | 4 5 -1 | 0.00     |
| 321 | 54.06319       | 1.69489 | 2 6 1  | 0.00     |
| 322 | 54.24976       | 1.68950 | 1 2 6  | 0.00     |
| 323 | 54.34745       | 1.68669 | 6 0 -3 | 0.00     |
| 324 | 54.40454       | 1.68506 | 2 0 6  | 0.00     |
| 325 | 54.52103       | 1.68173 | 6 2 -2 | 0.00     |
| 326 | 54.52792       | 1.68154 | 3 1 -6 | 0.00     |
| 327 | 54.86760       | 1.67193 | 1 5 4  | 0.00     |
| 328 | 54.91866       | 1.67049 | 1 4 5  | 0.00     |
| 329 | 54.92485       | 1.67032 | 6 2 1  | 0.00     |
| 330 | 54.98480       | 1.66864 | 2 4 -5 | 0.00     |
| 331 | 55.02080       | 1.66763 | 6 0 2  | 0.00     |
| 332 | 55.04742       | 1.66689 | 6 1 -3 | 0.00     |
| 333 | 55.10402       | 1.66531 | 2 1 6  | 0.00     |
| 334 | 55.15541       | 1.66388 | 4 5 1  | 0.00     |
| 335 | 55.30948       | 1.65961 | 2 6 -2 | 0.00     |
| 336 | 55.34265       | 1.65870 | 3 4 4  | 0.00     |
| 337 | 55.34407       | 1.65866 | 2 5 -4 | 0.00     |
| 338 | 55.37839       | 1.65771 | 5 4 1  | 0.00     |
| 339 | 55.38689       | 1.65748 | 5 4 -2 | 0.00     |
| 340 | 55.47631       | 1.65502 | 4 4 3  | 0.00     |
| 341 | 55.57307       | 1.65236 | 4 5 -2 | 0.00     |
| 342 | 55.71507       | 1.64849 | 6 1 2  | 0.00     |
| 343 | 55.95327       | 1.64203 | 4 3 4  | 0.00     |
| 344 | 56.08895       | 1.63838 | 1 3 -6 | 0.00     |
| 345 | 56.20234       | 1.63535 | 0 3 6  | 0.00     |
| 346 | 56.38246       | 1.63055 | 3 5 3  | 0.00     |
| 347 | 56.39426       | 1.63023 | 2 6 2  | 0.00     |
| 348 | 56.40877       | 1.62985 | 4 0 5  | 0.00     |
| 349 | 56.44397       | 1.62892 | 4 4 -4 | 0.00     |
| 350 | 56.45628       | 1.62859 | 0 6 3  | 0.00     |
| 351 | 56.57844       | 1.62536 | 5 0 4  | 0.00     |
| 352 | 56.60356       | 1.62470 | 5 0 -5 | 0.00     |
| 353 | 56.60584       | 1.62464 | 3 2 -6 | 0.00     |
| 354 | 56.62586       | 1.62412 | 3 6 0  | 0.00     |
| 355 | 56.74673       | 1.62094 | 1 6 -3 | 0.00     |
| 356 | 56.74936       | 1.62087 | 6 3 -1 | 0.00     |

**rosickyite low, cyclo-octasulfur**

| No. | 2 $\theta$ , ° | d, Å    | h k l  | Norm. I. |
|-----|----------------|---------|--------|----------|
| 357 | 56.88066       | 1.61744 | 6 3 0  | 0.00     |
| 358 | 56.89698       | 1.61702 | 3 6 -1 | 0.00     |
| 359 | 57.03812       | 1.61335 | 3 3 5  | 0.00     |
| 360 | 57.09185       | 1.61196 | 4 1 5  | 0.00     |
| 361 | 57.11273       | 1.61142 | 6 2 -3 | 0.00     |
| 362 | 57.16797       | 1.61000 | 2 2 6  | 0.00     |
| 363 | 57.18858       | 1.60946 | 4 3 -5 | 0.00     |
| 364 | 57.26020       | 1.60762 | 5 1 4  | 0.00     |
| 365 | 57.28513       | 1.60698 | 5 1 -5 | 0.00     |
| 366 | 57.33739       | 1.60564 | 5 3 3  | 0.00     |
| 367 | 57.35676       | 1.60514 | 5 3 -4 | 0.00     |
| 368 | 57.36176       | 1.60502 | 2 3 -6 | 0.00     |
| 369 | 57.49930       | 1.60150 | 2 5 4  | 0.00     |
| 370 | 57.54822       | 1.60026 | 1 6 3  | 0.00     |
| 371 | 57.68170       | 1.59687 | 2 4 5  | 0.00     |
| 372 | 57.69661       | 1.59649 | 1 3 6  | 0.00     |
| 373 | 57.69713       | 1.59648 | 3 6 1  | 0.00     |
| 374 | 57.72269       | 1.59584 | 4 5 2  | 0.00     |
| 375 | 57.76464       | 1.59478 | 6 2 2  | 0.00     |
| 376 | 57.78843       | 1.59418 | 3 4 -5 | 0.00     |
| 377 | 57.90853       | 1.59116 | 4 0 -6 | 0.00     |
| 378 | 57.95714       | 1.58994 | 6 3 -2 | 0.00     |
| 379 | 58.07149       | 1.58708 | 5 4 2  | 0.00     |
| 380 | 58.08522       | 1.58674 | 5 4 -3 | 0.00     |
| 381 | 58.26833       | 1.58218 | 3 5 -4 | 0.00     |
| 382 | 58.27888       | 1.58192 | 6 0 -4 | 0.00     |
| 383 | 58.34524       | 1.58028 | 6 3 1  | 0.00     |
| 384 | 58.39762       | 1.57899 | 4 5 -3 | 0.00     |
| 385 | 58.40625       | 1.57878 | 2 6 -3 | 0.00     |
| 386 | 58.49848       | 1.57651 | 3 6 -2 | 0.00     |
| 387 | 58.54967       | 1.57525 | 1 0 -7 | 0.00     |
| 388 | 58.58035       | 1.57450 | 4 1 -6 | 0.00     |
| 389 | 58.68333       | 1.57198 | 3 0 6  | 0.00     |
| 390 | 58.79129       | 1.56935 | 0 0 7  | 0.00     |
| 391 | 58.94805       | 1.56555 | 6 1 -4 | 0.00     |
| 392 | 59.11053       | 1.56163 | 4 2 5  | 0.00     |
| 393 | 59.17885       | 1.55999 | 6 0 3  | 0.00     |
| 394 | 59.21693       | 1.55908 | 1 1 -7 | 0.00     |
| 395 | 59.27525       | 1.55769 | 5 2 4  | 0.00     |

**rosickyite low, cyclo-octasulfur**

| No. | 2 $\theta$ , ° | d, Å    | h k l  | Norm. I. |
|-----|----------------|---------|--------|----------|
| 396 | 59.29964       | 1.55711 | 5 2 -5 | 0.00     |
| 397 | 59.34966       | 1.55591 | 3 1 6  | 0.00     |
| 398 | 59.43005       | 1.55400 | 7 0 -1 | 0.00     |
| 399 | 59.45686       | 1.55336 | 0 1 7  | 0.00     |
| 400 | 59.65899       | 1.54858 | 2 0 -7 | 0.00     |
| 401 | 59.67474       | 1.54821 | 0 5 5  | 0.00     |
| 402 | 59.68767       | 1.54791 | 7 0 0  | 0.00     |
| 403 | 59.69565       | 1.54772 | 1 5 -5 | 0.00     |
| 404 | 59.84177       | 1.54429 | 6 1 3  | 0.00     |
| 405 | 59.89213       | 1.54311 | 0 7 1  | 0.00     |
| 406 | 59.91030       | 1.54269 | 1 7 0  | 0.00     |
| 407 | 59.96394       | 1.54143 | 3 3 -6 | 0.00     |
| 408 | 59.97418       | 1.54119 | 2 6 3  | 0.00     |
| 409 | 60.06492       | 1.53908 | 3 6 2  | 0.00     |
| 410 | 60.09128       | 1.53847 | 7 1 -1 | 0.00     |
| 411 | 60.12898       | 1.53760 | 5 5 0  | 0.00     |
| 412 | 60.13167       | 1.53753 | 5 5 -1 | 0.00     |
| 413 | 60.31868       | 1.53321 | 2 1 -7 | 0.00     |
| 414 | 60.34718       | 1.53256 | 7 1 0  | 0.00     |
| 415 | 60.37382       | 1.53195 | 1 0 7  | 0.00     |
| 416 | 60.43041       | 1.53065 | 1 7 -1 | 0.00     |
| 417 | 60.45301       | 1.53013 | 6 3 -3 | 0.00     |
| 418 | 60.47526       | 1.52962 | 7 0 -2 | 0.00     |
| 419 | 60.50634       | 1.52891 | 2 3 6  | 0.00     |
| 420 | 60.56789       | 1.52750 | 4 2 -6 | 0.00     |
| 421 | 60.65430       | 1.52553 | 4 4 4  | 0.00     |
| 422 | 60.68813       | 1.52476 | 1 7 1  | 0.00     |
| 423 | 60.78329       | 1.52260 | 1 4 -6 | 0.00     |
| 424 | 60.89113       | 1.52016 | 0 4 6  | 0.00     |
| 425 | 60.92824       | 1.51933 | 6 2 -4 | 0.00     |
| 426 | 60.98704       | 1.51800 | 1 5 5  | 0.00     |
| 427 | 61.02886       | 1.51706 | 1 1 7  | 0.00     |
| 428 | 61.04894       | 1.51661 | 2 5 -5 | 0.00     |
| 429 | 61.07015       | 1.51614 | 0 6 4  | 0.00     |
| 430 | 61.08264       | 1.51586 | 6 3 2  | 0.00     |
| 431 | 61.12966       | 1.51480 | 7 1 -2 | 0.00     |
| 432 | 61.19183       | 1.51341 | 1 2 -7 | 0.00     |
| 433 | 61.21888       | 1.51281 | 1 6 -4 | 0.00     |
| 434 | 61.23817       | 1.51238 | 7 0 1  | 0.00     |

**rosickyite low, cyclo-octasulfur**

| No. | 2 $\theta$ , ° | d, Å    | h k l  | Norm. I. |
|-----|----------------|---------|--------|----------|
| 435 | 61.32197       | 1.51051 | 3 2 6  | 0.00     |
| 436 | 61.35713       | 1.50973 | 4 6 0  | 0.00     |
| 437 | 61.36492       | 1.50956 | 3 6 -3 | 0.00     |
| 438 | 61.38406       | 1.50913 | 3 5 4  | 0.00     |
| 439 | 61.41176       | 1.50852 | 6 4 -1 | 0.00     |
| 440 | 61.41755       | 1.50839 | 5 5 1  | 0.00     |
| 441 | 61.42551       | 1.50821 | 5 5 -2 | 0.00     |
| 442 | 61.42710       | 1.50818 | 0 2 7  | 0.00     |
| 443 | 61.48757       | 1.50684 | 4 6 -1 | 0.00     |
| 444 | 61.50933       | 1.50636 | 4 5 3  | 0.00     |
| 445 | 61.53683       | 1.50575 | 6 4 0  | 0.00     |
| 446 | 61.68687       | 1.50245 | 3 4 5  | 0.00     |
| 447 | 61.80465       | 1.49987 | 6 2 3  | 0.00     |
| 448 | 61.82742       | 1.49937 | 0 7 2  | 0.00     |
| 449 | 61.83029       | 1.49931 | 4 4 -5 | 0.00     |
| 450 | 61.88780       | 1.49805 | 7 1 1  | 0.00     |
| 451 | 61.89872       | 1.49781 | 2 7 0  | 0.00     |
| 452 | 61.97219       | 1.49622 | 5 4 3  | 0.00     |
| 453 | 61.99066       | 1.49581 | 5 4 -4 | 0.00     |
| 454 | 61.99543       | 1.49571 | 2 4 -6 | 0.00     |
| 455 | 62.04945       | 1.49454 | 7 2 -1 | 0.00     |
| 456 | 62.07495       | 1.49398 | 3 0 -7 | 0.00     |
| 457 | 62.22904       | 1.49066 | 1 7 -2 | 0.00     |
| 458 | 62.23823       | 1.49046 | 1 6 4  | 0.00     |
| 459 | 62.27263       | 1.48972 | 2 2 -7 | 0.00     |
| 460 | 62.28232       | 1.48951 | 2 7 -1 | 0.00     |
| 461 | 62.30060       | 1.48911 | 7 2 0  | 0.00     |
| 462 | 62.31493       | 1.48881 | 1 4 6  | 0.00     |
| 463 | 62.38469       | 1.48731 | 4 3 5  | 0.00     |
| 464 | 62.41778       | 1.48660 | 4 5 -4 | 0.00     |
| 465 | 62.50438       | 1.48475 | 4 6 1  | 0.00     |
| 466 | 62.54424       | 1.48390 | 5 3 4  | 0.00     |
| 467 | 62.56368       | 1.48348 | 6 4 -2 | 0.00     |
| 468 | 62.56787       | 1.48339 | 5 3 -5 | 0.00     |
| 469 | 62.67898       | 1.48103 | 2 6 -4 | 0.00     |
| 470 | 62.71957       | 1.48017 | 3 1 -7 | 0.00     |
| 471 | 62.73517       | 1.47984 | 1 7 2  | 0.00     |
| 472 | 62.78430       | 1.47880 | 7 0 -3 | 0.00     |
| 473 | 62.78821       | 1.47872 | 2 7 1  | 0.00     |

**rosickyite low, cyclo-octasulfur**

| No. | 2 $\theta$ , ° | d, Å    | h k l  | Norm. I. |
|-----|----------------|---------|--------|----------|
| 474 | 62.89110       | 1.47655 | 4 6 -2 | 0.00     |
| 475 | 62.93450       | 1.47563 | 6 4 1  | 0.00     |
| 476 | 62.96989       | 1.47489 | 1 2 7  | 0.00     |
| 477 | 63.06890       | 1.47281 | 7 2 -2 | 0.00     |
| 478 | 63.09579       | 1.47225 | 5 0 5  | 0.00     |
| 479 | 63.12453       | 1.47165 | 5 0 -6 | 0.00     |
| 480 | 63.23671       | 1.46931 | 2 0 7  | 0.00     |
| 481 | 63.31822       | 1.46761 | 6 0 -5 | 0.00     |
| 482 | 63.42483       | 1.46540 | 7 1 -3 | 0.00     |
| 483 | 63.58364       | 1.46212 | 2 5 5  | 0.00     |
| 484 | 63.64222       | 1.46092 | 3 6 3  | 0.00     |
| 485 | 63.68436       | 1.46005 | 3 5 -5 | 0.00     |
| 486 | 63.73458       | 1.45902 | 5 1 5  | 0.00     |
| 487 | 63.76316       | 1.45844 | 5 1 -6 | 0.00     |
| 488 | 63.79774       | 1.45773 | 4 3 -6 | 0.00     |
| 489 | 63.81383       | 1.45740 | 7 2 1  | 0.00     |
| 490 | 63.87472       | 1.45616 | 2 1 7  | 0.00     |
| 491 | 63.92599       | 1.45512 | 2 7 -2 | 0.00     |
| 492 | 63.95165       | 1.45459 | 5 5 2  | 0.00     |
| 493 | 63.95578       | 1.45451 | 6 1 -5 | 0.00     |
| 494 | 63.96462       | 1.45433 | 5 5 -3 | 0.00     |
| 495 | 64.02626       | 1.45308 | 7 0 2  | 0.00     |
| 496 | 64.07075       | 1.45218 | 4 0 6  | 0.00     |
| 497 | 64.14762       | 1.45062 | 6 3 -4 | 0.00     |
| 498 | 64.40367       | 1.44547 | 1 3 -7 | 0.00     |
| 499 | 64.41982       | 1.44515 | 6 0 4  | 0.00     |
| 500 | 64.48458       | 1.44385 | 3 4 -6 | 0.00     |
| 501 | 64.53013       | 1.44294 | 3 3 6  | 0.00     |
| 502 | 64.63168       | 1.44092 | 3 2 -7 | 0.00     |
| 503 | 64.63230       | 1.44091 | 0 3 7  | 0.00     |
| 504 | 64.65999       | 1.44036 | 7 1 2  | 0.00     |
| 505 | 64.68222       | 1.43992 | 2 6 4  | 0.00     |
| 506 | 64.70425       | 1.43948 | 4 1 6  | 0.00     |
| 507 | 64.89073       | 1.43579 | 4 6 2  | 0.00     |
| 508 | 64.92127       | 1.43519 | 2 7 2  | 0.00     |
| 509 | 64.95397       | 1.43455 | 6 4 -3 | 0.00     |
| 510 | 64.97831       | 1.43407 | 0 7 3  | 0.00     |
| 511 | 64.99935       | 1.43366 | 6 3 3  | 0.00     |

**Rosickyite, syn**

| No. | 2 $\theta$ , ° | d, Å     | h k l  | Norm. I. |
|-----|----------------|----------|--------|----------|
| 1   | 6.88655        | 12.82538 | 0 1 0  | 0.50     |
| 2   | 12.98033       | 6.81481  | 1 0 0  | 0.10     |
| 3   | 13.43531       | 6.58504  | 1 1 -1 | 0.00     |
| 4   | 13.70836       | 6.45448  | 0 1 1  | 18.20    |
| 5   | 13.79813       | 6.41269  | 0 2 0  | 10.80    |
| 6   | 14.70791       | 6.01801  | 1 1 0  | 27.50    |
| 7   | 18.01244       | 4.92071  | 1 2 -1 | 1.20     |
| 8   | 18.21851       | 4.86551  | 0 2 1  | 0.20     |
| 9   | 18.98756       | 4.67015  | 1 2 0  | 0.30     |
| 10  | 19.48900       | 4.55110  | 1 0 -2 | 0.50     |
| 11  | 20.69237       | 4.28907  | 1 1 -2 | 0.00     |
| 12  | 20.76061       | 4.27513  | 0 3 0  | 67.10    |
| 13  | 22.68403       | 3.91679  | 2 1 -1 | 0.30     |
| 14  | 23.16302       | 3.83687  | 2 0 -2 | 0.00     |
| 15  | 23.17739       | 3.83452  | 1 1 1  | 13.50    |
| 16  | 23.80606       | 3.73466  | 1 3 -1 | 9.90     |
| 17  | 23.80617       | 3.73465  | 0 0 2  | 0.00     |
| 18  | 23.95740       | 3.71141  | 1 2 -2 | 13.00    |
| 19  | 23.96431       | 3.71036  | 0 3 1  | 0.00     |
| 20  | 24.19234       | 3.67590  | 2 1 -2 | 100.00   |
| 21  | 24.56133       | 3.62150  | 1 3 0  | 61.90    |
| 22  | 24.81035       | 3.58572  | 0 1 2  | 95.80    |
| 23  | 25.70989       | 3.46226  | 2 2 -1 | 2.00     |
| 24  | 26.13107       | 3.40741  | 2 0 0  | 0.00     |
| 25  | 26.14949       | 3.40505  | 1 2 1  | 39.80    |
| 26  | 27.05449       | 3.29316  | 2 1 0  | 6.20     |
| 27  | 27.05990       | 3.29252  | 2 2 -2 | 0.00     |
| 28  | 27.61797       | 3.22724  | 0 2 2  | 9.40     |
| 29  | 27.80157       | 3.20634  | 0 4 0  | 14.70    |
| 30  | 28.62486       | 3.11597  | 1 3 -2 | 59.50    |
| 31  | 29.66536       | 3.00900  | 2 2 0  | 45.50    |
| 32  | 30.12532       | 2.96410  | 2 3 -1 | 0.00     |
| 33  | 30.18397       | 2.95848  | 1 4 -1 | 18.70    |
| 34  | 30.31116       | 2.94635  | 0 4 1  | 11.30    |
| 35  | 30.50614       | 2.92796  | 1 3 1  | 9.80     |
| 36  | 30.77735       | 2.90278  | 2 1 -3 | 6.10     |
| 37  | 30.79379       | 2.90126  | 1 4 0  | 0.00     |
| 38  | 31.15096       | 2.86881  | 1 1 -3 | 7.40     |
| 39  | 31.29998       | 2.85549  | 2 3 -2 | 0.00     |



**Rosickyite, syn**

| No. | 2 $\theta$ , ° | d, Å    | h k l  | Norm. I. |
|-----|----------------|---------|--------|----------|
| 40  | 31.78988       | 2.81259 | 0 3 2  | 1.30     |
| 41  | 32.33153       | 2.76670 | 3 0 -2 | 1.40     |
| 42  | 33.09638       | 2.70449 | 3 1 -2 | 0.00     |
| 43  | 33.12097       | 2.70254 | 2 2 -3 | 9.80     |
| 44  | 33.27767       | 2.69017 | 1 0 2  | 1.00     |
| 45  | 33.47112       | 2.67506 | 1 2 -3 | 2.30     |
| 46  | 33.60650       | 2.66459 | 2 3 0  | 0.00     |
| 47  | 34.02364       | 2.63287 | 1 1 2  | 0.80     |
| 48  | 34.18030       | 2.62116 | 1 4 -2 | 0.90     |
| 49  | 34.75946       | 2.57880 | 3 1 -1 | 2.80     |
| 50  | 34.95145       | 2.56508 | 0 5 0  | 0.00     |
| 51  | 35.30276       | 2.54035 | 3 2 -2 | 0.00     |
| 52  | 35.31748       | 2.53933 | 2 1 1  | 13.00    |
| 53  | 35.46913       | 2.52881 | 2 4 -1 | 10.80    |
| 54  | 35.76592       | 2.50851 | 3 1 -3 | 0.00     |
| 55  | 35.79907       | 2.50626 | 1 4 1  | 9.50     |
| 56  | 36.18031       | 2.48072 | 1 2 2  | 5.70     |
| 57  | 36.49030       | 2.46036 | 2 4 -2 | 4.20     |
| 58  | 36.73156       | 2.44475 | 2 3 -3 | 0.00     |
| 59  | 36.74108       | 2.44414 | 0 1 3  | 6.70     |
| 60  | 36.87856       | 2.43534 | 3 2 -1 | 16.30    |
| 61  | 36.91904       | 2.43276 | 1 5 -1 | 0.00     |
| 62  | 36.91911       | 2.43276 | 0 4 2  | 0.00     |
| 63  | 37.02557       | 2.42601 | 0 5 1  | 2.50     |
| 64  | 37.05176       | 2.42435 | 1 3 -3 | 0.00     |
| 65  | 37.40913       | 2.40201 | 2 2 1  | 0.00     |
| 66  | 37.43108       | 2.40065 | 1 5 0  | 8.10     |
| 67  | 37.83615       | 2.37588 | 3 2 -3 | 6.60     |
| 68  | 38.52310       | 2.33507 | 2 4 0  | 1.30     |
| 69  | 38.73601       | 2.32273 | 3 3 -2 | 3.30     |
| 70  | 38.76657       | 2.32097 | 0 2 3  | 0.00     |
| 71  | 39.54805       | 2.27689 | 1 3 2  | 2.80     |
| 72  | 39.57222       | 2.27555 | 2 0 -4 | 0.00     |
| 73  | 39.64387       | 2.27160 | 3 0 0  | 0.00     |
| 74  | 40.19637       | 2.24165 | 3 3 -1 | 0.60     |
| 75  | 40.21671       | 2.24056 | 2 1 -4 | 0.00     |
| 76  | 40.28740       | 2.23679 | 3 1 0  | 0.00     |
| 77  | 40.32878       | 2.23459 | 1 5 -2 | 2.10     |
| 78  | 40.69024       | 2.21557 | 2 3 1  | 1.50     |

**Rosickyite, syn**

| No. | 2 $\theta$ , ° | d, Å    | h k l  | Norm. I. |
|-----|----------------|---------|--------|----------|
| 79  | 41.08846       | 2.19501 | 3 3 -3 | 0.40     |
| 80  | 41.32770       | 2.18286 | 2 4 -3 | 2.20     |
| 81  | 41.43191       | 2.17761 | 3 0 -4 | 1.30     |
| 82  | 41.45310       | 2.17654 | 2 5 -1 | 0.00     |
| 83  | 41.61795       | 2.16830 | 1 4 -3 | 5.90     |
| 84  | 41.74263       | 2.16211 | 1 5 1  | 0.00     |
| 85  | 41.95835       | 2.15149 | 0 3 3  | 5.10     |
| 86  | 42.05277       | 2.14688 | 3 1 -4 | 0.00     |
| 87  | 42.10099       | 2.14453 | 2 2 -4 | 1.20     |
| 88  | 42.16908       | 2.14123 | 3 2 0  | 1.40     |
| 89  | 42.20071       | 2.13970 | 1 0 -4 | 0.00     |
| 90  | 42.24486       | 2.13756 | 0 6 0  | 0.00     |
| 91  | 42.35139       | 2.13243 | 2 5 -2 | 0.30     |
| 92  | 42.73046       | 2.11439 | 0 5 2  | 0.10     |
| 93  | 42.81249       | 2.11053 | 1 1 -4 | 0.00     |
| 94  | 43.15250       | 2.09468 | 3 4 -2 | 0.00     |
| 95  | 43.87243       | 2.06196 | 3 2 -4 | 0.00     |
| 96  | 43.89684       | 2.06087 | 1 4 2  | 4.60     |
| 97  | 43.93514       | 2.05917 | 1 6 -1 | 0.00     |
| 98  | 43.99170       | 2.05665 | 4 0 -2 | 0.00     |
| 99  | 44.02740       | 2.05506 | 0 6 1  | 0.00     |
| 100 | 44.15757       | 2.04931 | 2 5 0  | 0.30     |
| 101 | 44.37928       | 2.03958 | 1 6 0  | 1.80     |
| 102 | 44.49305       | 2.03463 | 3 4 -1 | 0.00     |
| 103 | 44.55679       | 2.03187 | 4 1 -3 | 0.00     |
| 104 | 44.58369       | 2.03071 | 4 1 -2 | 3.30     |
| 105 | 44.60716       | 2.02969 | 1 2 -4 | 0.00     |
| 106 | 44.94835       | 2.01507 | 2 4 1  | 0.30     |
| 107 | 45.08793       | 2.00916 | 2 0 2  | 0.00     |
| 108 | 45.09836       | 2.00872 | 2 3 -4 | 1.10     |
| 109 | 45.16281       | 2.00600 | 3 3 0  | 0.00     |
| 110 | 45.31615       | 1.99957 | 3 4 -3 | 1.00     |
| 111 | 45.66869       | 1.98495 | 2 1 2  | 2.60     |
| 112 | 45.91052       | 1.97506 | 1 1 3  | 0.90     |
| 113 | 46.12164       | 1.96651 | 0 4 3  | 0.80     |
| 114 | 46.29766       | 1.95944 | 4 2 -3 | 1.20     |
| 115 | 46.32377       | 1.95840 | 4 2 -2 | 0.00     |
| 116 | 46.68455       | 1.94410 | 2 5 -3 | 10.10    |
| 117 | 46.77915       | 1.94039 | 3 3 -4 | 0.00     |

**Rosickyite, syn**

| No. | 2 $\theta$ , ° | d, Å    | h k l  | Norm. I. |
|-----|----------------|---------|--------|----------|
| 118 | 46.92274       | 1.93478 | 1 6 -2 | 0.00     |
| 119 | 46.94817       | 1.93379 | 1 5 -3 | 1.70     |
| 120 | 47.34692       | 1.91843 | 4 0 -4 | 0.60     |
| 121 | 47.37767       | 1.91726 | 2 2 2  | 0.00     |
| 122 | 47.47858       | 1.91342 | 1 3 -4 | 0.00     |
| 123 | 47.61280       | 1.90834 | 1 2 3  | 0.20     |
| 124 | 47.90645       | 1.89733 | 4 1 -4 | 0.00     |
| 125 | 47.92224       | 1.89674 | 2 6 -1 | 4.20     |
| 126 | 47.98274       | 1.89449 | 4 1 -1 | 0.00     |
| 127 | 48.18070       | 1.88716 | 1 6 1  | 3.90     |
| 128 | 48.34794       | 1.88103 | 3 5 -2 | 2.10     |
| 129 | 48.58362       | 1.87245 | 3 1 1  | 2.10     |
| 130 | 48.72546       | 1.86733 | 2 6 -2 | 0.60     |
| 131 | 48.72569       | 1.86732 | 0 0 4  | 0.00     |
| 132 | 49.03036       | 1.85643 | 1 5 2  | 0.00     |
| 133 | 49.05074       | 1.85571 | 2 4 -4 | 9.70     |
| 134 | 49.06559       | 1.85518 | 0 6 2  | 0.00     |
| 135 | 49.09252       | 1.85422 | 4 3 -3 | 0.00     |
| 136 | 49.11119       | 1.85356 | 3 4 0  | 0.00     |
| 137 | 49.11750       | 1.85334 | 4 3 -2 | 0.00     |
| 138 | 49.27341       | 1.84784 | 0 1 4  | 1.00     |
| 139 | 49.55637       | 1.83795 | 4 2 -4 | 0.00     |
| 140 | 49.57854       | 1.83718 | 3 5 -1 | 2.20     |
| 141 | 49.63076       | 1.83537 | 4 2 -1 | 2.00     |
| 142 | 49.72251       | 1.83220 | 0 7 0  | 0.00     |
| 143 | 49.99806       | 1.82274 | 2 5 1  | 0.00     |
| 144 | 50.12683       | 1.81836 | 2 3 2  | 7.30     |
| 145 | 50.21692       | 1.81531 | 3 2 1  | 4.30     |
| 146 | 50.33751       | 1.81124 | 3 5 -3 | 0.00     |
| 147 | 50.35215       | 1.81075 | 2 6 0  | 4.90     |
| 148 | 50.35232       | 1.81075 | 1 3 3  | 0.00     |
| 149 | 50.63111       | 1.80143 | 3 4 -4 | 0.90     |
| 150 | 50.86846       | 1.79358 | 3 1 -5 | 2.60     |
| 151 | 50.89033       | 1.79286 | 0 2 4  | 0.00     |
| 152 | 51.08261       | 1.78656 | 0 5 3  | 0.00     |
| 153 | 51.21958       | 1.78210 | 1 7 -1 | 0.00     |
| 154 | 51.28027       | 1.78014 | 2 1 -5 | 0.00     |
| 155 | 51.29106       | 1.77979 | 1 4 -4 | 8.00     |
| 156 | 51.30173       | 1.77944 | 0 7 1  | 0.00     |

**Rosickyite, syn**

| No. | 2 $\theta$ , ° | d, Å    | h k l  | Norm. I. |
|-----|----------------|---------|--------|----------|
| 157 | 51.61539       | 1.76936 | 1 7 0  | 0.30     |
| 158 | 52.22029       | 1.75028 | 4 3 -4 | 0.00     |
| 159 | 52.29193       | 1.74805 | 4 3 -1 | 3.60     |
| 160 | 52.44958       | 1.74317 | 3 2 -5 | 5.70     |
| 161 | 52.65196       | 1.73695 | 2 6 -3 | 0.00     |
| 162 | 52.81877       | 1.73185 | 4 4 -3 | 9.30     |
| 163 | 52.84247       | 1.73113 | 4 4 -2 | 0.00     |
| 164 | 52.85258       | 1.73082 | 2 2 -5 | 0.00     |
| 165 | 52.85671       | 1.73070 | 3 3 1  | 0.00     |
| 166 | 52.89337       | 1.72959 | 1 6 -3 | 0.00     |
| 167 | 53.50631       | 1.71121 | 0 3 4  | 0.30     |
| 168 | 53.76095       | 1.70370 | 4 0 0  | 0.00     |
| 169 | 53.80119       | 1.70252 | 2 4 2  | 0.00     |
| 170 | 53.81034       | 1.70226 | 2 5 -4 | 0.00     |
| 171 | 53.86692       | 1.70060 | 3 5 0  | 1.90     |
| 172 | 53.90005       | 1.69963 | 1 7 -2 | 0.00     |
| 173 | 54.01570       | 1.69627 | 1 4 3  | 0.60     |
| 174 | 54.15540       | 1.69222 | 4 1 -5 | 1.50     |
| 175 | 54.17962       | 1.69152 | 3 6 -2 | 0.00     |
| 176 | 54.27179       | 1.68887 | 4 1 0  | 0.00     |
| 177 | 54.80576       | 1.67367 | 2 7 -1 | 4.50     |
| 178 | 54.80930       | 1.67357 | 1 6 2  | 0.00     |
| 179 | 55.01325       | 1.66785 | 3 3 -5 | 0.00     |
| 180 | 55.04064       | 1.66708 | 1 7 1  | 1.70     |
| 181 | 55.29296       | 1.66007 | 3 5 -4 | 0.00     |
| 182 | 55.31629       | 1.65942 | 3 6 -1 | 0.00     |
| 183 | 55.33242       | 1.65898 | 1 1 -5 | 0.70     |
| 184 | 55.40336       | 1.65702 | 2 3 -5 | 0.60     |
| 185 | 55.53662       | 1.65336 | 2 7 -2 | 0.70     |
| 186 | 55.67091       | 1.64969 | 4 2 -5 | 0.00     |
| 187 | 55.70499       | 1.64876 | 2 6 1  | 0.00     |
| 188 | 55.76464       | 1.64714 | 5 1 -3 | 5.40     |
| 189 | 55.78516       | 1.64658 | 4 2 0  | 0.00     |
| 190 | 55.79706       | 1.64626 | 4 4 -4 | 0.00     |
| 191 | 55.84690       | 1.64491 | 0 7 2  | 0.00     |
| 192 | 55.86553       | 1.64440 | 4 4 -1 | 0.00     |
| 193 | 55.91418       | 1.64309 | 1 5 -4 | 0.00     |
| 194 | 56.01993       | 1.64024 | 3 6 -3 | 0.00     |
| 195 | 56.33977       | 1.63168 | 5 0 -4 | 0.50     |

**Rosickyite, syn**

| No. | 2 $\theta$ , ° | d, Å    | h k l  | Norm. I. |
|-----|----------------|---------|--------|----------|
| 196 | 56.40568       | 1.62993 | 3 4 1  | 0.00     |
| 197 | 56.71254       | 1.62184 | 0 6 3  | 0.60     |
| 198 | 56.82687       | 1.61885 | 1 2 -5 | 0.50     |
| 199 | 56.83497       | 1.61864 | 5 1 -4 | 0.00     |
| 200 | 57.02460       | 1.61370 | 2 7 0  | 0.00     |
| 201 | 57.02774       | 1.61362 | 0 4 4  | 2.70     |
| 202 | 57.12504       | 1.61110 | 5 0 -2 | 1.60     |
| 203 | 57.25165       | 1.60784 | 5 2 -3 | 4.00     |
| 204 | 57.35667       | 1.60515 | 4 5 -3 | 6.50     |
| 205 | 57.37698       | 1.60463 | 2 1 3  | 0.00     |
| 206 | 57.37909       | 1.60457 | 4 5 -2 | 0.00     |
| 207 | 57.43387       | 1.60317 | 0 8 0  | 0.00     |
| 208 | 57.61586       | 1.59854 | 5 1 -2 | 0.60     |
| 209 | 58.13815       | 1.58542 | 4 3 -5 | 0.00     |
| 210 | 58.16819       | 1.58467 | 1 0 4  | 1.50     |
| 211 | 58.24925       | 1.58266 | 4 3 0  | 0.00     |
| 212 | 58.28742       | 1.58171 | 2 5 2  | 0.00     |
| 213 | 58.30422       | 1.58130 | 5 2 -4 | 0.00     |
| 214 | 58.33750       | 1.58047 | 3 0 2  | 2.70     |
| 215 | 58.47399       | 1.57711 | 3 4 -5 | 0.00     |
| 216 | 58.49096       | 1.57669 | 1 5 3  | 2.20     |
| 217 | 58.65345       | 1.57271 | 1 1 4  | 0.80     |
| 218 | 58.79377       | 1.56929 | 1 8 -1 | 0.00     |
| 219 | 58.82189       | 1.56861 | 3 1 2  | 0.00     |
| 220 | 58.83758       | 1.56823 | 2 2 3  | 3.90     |
| 221 | 58.84909       | 1.56795 | 2 4 -5 | 0.00     |
| 222 | 58.86865       | 1.56747 | 0 8 1  | 0.00     |
| 223 | 59.07273       | 1.56254 | 5 2 -2 | 0.00     |
| 224 | 59.14502       | 1.56081 | 2 7 -3 | 0.50     |
| 225 | 59.15482       | 1.56057 | 1 8 0  | 0.00     |
| 226 | 59.26283       | 1.55798 | 2 6 -4 | 0.00     |
| 227 | 59.26298       | 1.55798 | 1 3 -5 | 0.70     |
| 228 | 59.31596       | 1.55672 | 3 6 0  | 0.00     |
| 229 | 59.36867       | 1.55546 | 1 7 -3 | 0.00     |
| 230 | 59.67676       | 1.54816 | 5 3 -3 | 0.10     |
| 231 | 60.09459       | 1.53839 | 1 2 4  | 0.00     |
| 232 | 60.18538       | 1.53629 | 4 5 -4 | 0.00     |
| 233 | 60.25065       | 1.53478 | 4 5 -1 | 0.00     |
| 234 | 60.26055       | 1.53455 | 3 2 2  | 1.00     |

**Rosickyite, syn**

| No. | 2 $\theta$ , ° | d, Å    | h k l  | Norm. I. |
|-----|----------------|---------|--------|----------|
| 235 | 60.56356       | 1.52760 | 3 7 -2 | 0.20     |
| 236 | 60.65803       | 1.52545 | 3 6 -4 | 0.00     |
| 237 | 60.70302       | 1.52442 | 5 3 -4 | 0.00     |
| 238 | 60.72715       | 1.52388 | 5 1 -5 | 0.00     |
| 239 | 60.76594       | 1.52300 | 3 5 1  | 0.30     |
| 240 | 61.03010       | 1.51703 | 3 0 -6 | 0.00     |
| 241 | 61.15045       | 1.51434 | 1 7 2  | 1.50     |
| 242 | 61.22356       | 1.51270 | 2 3 3  | 0.00     |
| 243 | 61.24439       | 1.51224 | 1 6 -4 | 0.00     |
| 244 | 61.25068       | 1.51210 | 1 8 -2 | 0.00     |
| 245 | 61.36014       | 1.50966 | 0 5 4  | 2.90     |
| 246 | 61.45315       | 1.50760 | 5 3 -2 | 0.00     |
| 247 | 61.48613       | 1.50687 | 4 4 -5 | 0.00     |
| 248 | 61.50151       | 1.50653 | 3 1 -6 | 1.60     |
| 249 | 61.59352       | 1.50450 | 4 4 0  | 2.30     |
| 250 | 61.62389       | 1.50383 | 3 7 -1 | 0.00     |
| 251 | 61.98739       | 1.49588 | 2 7 1  | 0.10     |
| 252 | 62.08684       | 1.49373 | 2 8 -1 | 0.00     |
| 253 | 62.13916       | 1.49260 | 5 2 -5 | 0.00     |
| 254 | 62.22177       | 1.49081 | 5 1 -1 | 0.00     |
| 255 | 62.25695       | 1.49005 | 4 0 -6 | 0.00     |
| 256 | 62.28226       | 1.48951 | 3 7 -3 | 0.00     |
| 257 | 62.30415       | 1.48904 | 1 8 1  | 0.20     |
| 258 | 62.45164       | 1.48588 | 1 3 4  | 0.90     |
| 259 | 62.54760       | 1.48383 | 0 1 5  | 0.00     |
| 260 | 62.57437       | 1.48326 | 1 4 -5 | 1.90     |
| 261 | 62.60977       | 1.48250 | 4 6 -3 | 0.00     |
| 262 | 62.61391       | 1.48241 | 3 3 2  | 0.00     |
| 263 | 62.63104       | 1.48205 | 4 6 -2 | 0.00     |
| 264 | 62.72301       | 1.48010 | 4 1 -6 | 0.00     |
| 265 | 62.74477       | 1.47964 | 3 5 -5 | 0.00     |
| 266 | 62.76365       | 1.47924 | 2 8 -2 | 1.50     |
| 267 | 62.87162       | 1.47696 | 4 1 1  | 0.00     |
| 268 | 62.90340       | 1.47629 | 3 2 -6 | 0.00     |
| 269 | 62.93175       | 1.47569 | 0 7 3  | 0.90     |
| 270 | 62.97519       | 1.47478 | 5 4 -3 | 0.00     |
| 271 | 63.05153       | 1.47317 | 0 8 2  | 0.70     |
| 272 | 63.10457       | 1.47206 | 2 5 -5 | 0.00     |
| 273 | 63.12231       | 1.47169 | 2 0 -6 | 0.00     |

**Rosickyite, syn**

| No. | 2 $\theta$ , ° | d, Å    | h k l  | Norm. I. |
|-----|----------------|---------|--------|----------|
| 274 | 63.49351       | 1.46398 | 2 6 2  | 0.00     |
| 275 | 63.58479       | 1.46210 | 2 1 -6 | 0.00     |
| 276 | 63.61459       | 1.46149 | 5 2 -1 | 0.00     |
| 277 | 63.68705       | 1.46000 | 1 6 3  | 0.00     |
| 278 | 63.93643       | 1.45490 | 0 2 5  | 0.00     |
| 279 | 63.97042       | 1.45421 | 5 4 -4 | 0.00     |
| 280 | 64.10972       | 1.45139 | 4 2 -6 | 0.00     |
| 281 | 64.14713       | 1.45063 | 2 8 0  | 0.00     |
| 282 | 64.25655       | 1.44843 | 4 2 1  | 0.00     |
| 283 | 64.45288       | 1.44449 | 5 3 -5 | 0.00     |
| 284 | 64.47582       | 1.44403 | 2 4 3  | 0.00     |
| 285 | 64.69887       | 1.43959 | 5 4 -2 | 0.00     |
| 286 | 64.96135       | 1.43440 | 2 2 -6 | 0.00     |

**?-S8**

| No. | 2 $\theta$ , ° | d, Å     | h k l  | Norm. I. |
|-----|----------------|----------|--------|----------|
| 1   | 8.04469        | 10.98141 | 1 0 0  | 9.30     |
| 2   | 11.39300       | 7.76047  | 1 1 0  | 1.00     |
| 3   | 11.46518       | 7.71178  | 0 1 1  | 0.00     |
| 4   | 13.52684       | 6.54068  | 1 1 -1 | 6.50     |
| 5   | 14.49961       | 6.10399  | 1 1 1  | 42.20    |
| 6   | 16.12938       | 5.49070  | 2 0 0  | 0.00     |
| 7   | 16.14842       | 5.48427  | 0 2 0  | 11.20    |
| 8   | 16.33406       | 5.42236  | 0 0 2  | 15.80    |
| 9   | 17.46345       | 5.07415  | 1 0 -2 | 0.90     |
| 10  | 18.05250       | 4.90988  | 2 1 0  | 0.00     |
| 11  | 18.06531       | 4.90643  | 1 2 0  | 22.20    |
| 12  | 18.11138       | 4.89405  | 0 2 1  | 0.00     |
| 13  | 18.23622       | 4.86083  | 0 1 2  | 0.00     |
| 14  | 18.97044       | 4.67432  | 1 0 2  | 0.00     |
| 15  | 19.12718       | 4.63637  | 2 1 -1 | 57.10    |
| 16  | 19.25770       | 4.60524  | 1 1 -2 | 46.50    |
| 17  | 19.49532       | 4.54964  | 1 2 -1 | 41.00    |
| 18  | 20.18926       | 4.39480  | 1 2 1  | 0.80     |
| 19  | 20.51647       | 4.32544  | 2 1 1  | 0.60     |
| 20  | 20.63856       | 4.30013  | 1 1 2  | 2.20     |
| 21  | 21.79823       | 4.07391  | 2 0 -2 | 23.70    |
| 22  | 22.90060       | 3.88024  | 2 2 0  | 0.00     |
| 23  | 23.04719       | 3.85589  | 0 2 2  | 75.90    |

## ?-S8

| No. | 2 $\theta$ , ° | d, Å    | h k l  | Norm. I. |
|-----|----------------|---------|--------|----------|
| 24  | 23.27289       | 3.81900 | 2 1 -2 | 75.30    |
| 25  | 23.76558       | 3.74093 | 2 2 -1 | 85.20    |
| 26  | 23.87183       | 3.72452 | 1 2 -2 | 55.90    |
| 27  | 24.20938       | 3.67335 | 2 0 2  | 53.20    |
| 28  | 24.29588       | 3.66047 | 3 0 0  | 29.90    |
| 29  | 24.90874       | 3.57178 | 2 2 1  | 100.00   |
| 30  | 25.01042       | 3.55748 | 1 2 2  | 34.30    |
| 31  | 25.55268       | 3.48321 | 2 1 2  | 0.00     |
| 32  | 25.63492       | 3.47222 | 3 1 0  | 0.00     |
| 33  | 25.65938       | 3.46896 | 1 3 0  | 0.00     |
| 34  | 25.69239       | 3.46458 | 0 3 1  | 86.70    |
| 35  | 25.93087       | 3.43326 | 0 1 3  | 0.00     |
| 36  | 26.14976       | 3.40501 | 3 1 -1 | 22.20    |
| 37  | 26.40820       | 3.37227 | 1 1 -3 | 96.70    |
| 38  | 26.70281       | 3.33573 | 1 3 -1 | 0.00     |
| 39  | 27.22232       | 3.27324 | 1 3 1  | 39.00    |
| 40  | 27.24692       | 3.27034 | 2 2 -2 | 0.00     |
| 41  | 27.71006       | 3.21672 | 3 1 1  | 0.00     |
| 42  | 27.94420       | 3.19030 | 3 0 -2 | 82.20    |
| 43  | 27.95514       | 3.18908 | 1 1 3  | 0.00     |
| 44  | 29.12728       | 3.06335 | 3 1 -2 | 3.90     |
| 45  | 29.23810       | 3.05200 | 2 2 2  | 0.00     |
| 46  | 29.27387       | 3.04835 | 2 1 -3 | 8.10     |
| 47  | 29.31076       | 3.04459 | 3 2 0  | 11.30    |
| 48  | 29.32427       | 3.04322 | 2 3 0  | 0.00     |
| 49  | 29.44088       | 3.03143 | 0 3 2  | 0.00     |
| 50  | 29.57265       | 3.01823 | 0 2 3  | 3.30     |
| 51  | 29.76677       | 2.99898 | 3 2 -1 | 13.80    |
| 52  | 29.99644       | 2.97654 | 1 2 -3 | 0.00     |
| 53  | 30.01637       | 2.97461 | 2 3 -1 | 11.10    |
| 54  | 30.10203       | 2.96634 | 1 3 -2 | 0.00     |
| 55  | 30.82482       | 2.89841 | 3 0 2  | 7.00     |
| 56  | 30.94510       | 2.88742 | 2 3 1  | 7.40     |
| 57  | 31.02845       | 2.87985 | 1 3 2  | 5.10     |
| 58  | 31.16060       | 2.86794 | 3 2 1  | 2.20     |
| 59  | 31.38103       | 2.84830 | 1 2 3  | 3.20     |
| 60  | 31.91058       | 2.80223 | 3 1 2  | 0.00     |
| 61  | 32.04562       | 2.79073 | 2 1 3  | 10.70    |
| 62  | 32.44051       | 2.75765 | 3 2 -2 | 2.70     |



## ?-S8

| No. | 2 $\theta$ , ° | d, Å    | h k l  | Norm. I. |
|-----|----------------|---------|--------|----------|
| 63  | 32.57358       | 2.74669 | 2 2 -3 | 6.30     |
| 64  | 32.58990       | 2.74535 | 4 0 0  | 0.00     |
| 65  | 32.62919       | 2.74214 | 0 4 0  | 0.00     |
| 66  | 32.88919       | 2.72105 | 2 3 -2 | 0.00     |
| 67  | 33.01234       | 2.71118 | 0 0 4  | 9.10     |
| 68  | 33.18218       | 2.69769 | 1 0 -4 | 4.50     |
| 69  | 33.62461       | 2.66320 | 4 1 0  | 0.00     |
| 70  | 33.66044       | 2.66045 | 1 4 0  | 0.00     |
| 71  | 33.68623       | 2.65847 | 0 4 1  | 24.70    |
| 72  | 33.81743       | 2.64845 | 4 1 -1 | 28.00    |
| 73  | 33.97771       | 2.63633 | 3 1 -3 | 0.00     |
| 74  | 34.03567       | 2.63197 | 0 1 4  | 0.00     |
| 75  | 34.20101       | 2.61962 | 1 1 -4 | 1.30     |
| 76  | 34.48220       | 2.59890 | 1 4 -1 | 11.10    |
| 77  | 34.58570       | 2.59136 | 2 3 2  | 0.00     |
| 78  | 34.64825       | 2.58682 | 3 3 0  | 12.80    |
| 79  | 34.86610       | 2.57116 | 1 0 4  | 0.00     |
| 80  | 34.87402       | 2.57059 | 0 3 3  | 1.50     |
| 81  | 34.89607       | 2.56902 | 1 4 1  | 0.00     |
| 82  | 34.98697       | 2.56255 | 3 2 2  | 0.00     |
| 83  | 35.04173       | 2.55867 | 3 3 -1 | 1.10     |
| 84  | 35.05212       | 2.55794 | 4 0 -2 | 0.00     |
| 85  | 35.11150       | 2.55375 | 2 2 3  | 0.00     |
| 86  | 35.24052       | 2.54469 | 1 3 -3 | 0.50     |
| 87  | 35.34987       | 2.53707 | 2 0 -4 | 0.40     |
| 88  | 35.47480       | 2.52842 | 4 1 1  | 0.30     |
| 89  | 35.84282       | 2.50330 | 1 1 4  | 0.00     |
| 90  | 36.02445       | 2.49110 | 4 1 -2 | 0.50     |
| 91  | 36.25424       | 2.47583 | 3 3 1  | 0.00     |
| 92  | 36.31527       | 2.47181 | 2 1 -4 | 1.20     |
| 93  | 36.44728       | 2.46316 | 1 3 3  | 0.50     |
| 94  | 36.57363       | 2.45494 | 4 2 0  | 0.00     |
| 95  | 36.60027       | 2.45322 | 2 4 0  | 0.00     |
| 96  | 36.69612       | 2.44703 | 0 4 2  | 0.00     |
| 97  | 36.75290       | 2.44338 | 4 2 -1 | 6.50     |
| 98  | 36.90203       | 2.43384 | 3 2 -3 | 0.00     |
| 99  | 36.95598       | 2.43041 | 0 2 4  | 2.10     |
| 100 | 37.10996       | 2.42068 | 1 2 -4 | 0.00     |
| 101 | 37.17105       | 2.41685 | 2 4 -1 | 5.60     |

## ?-S8

| No. | 2 $\theta$ , ° | d, Å    | h k l  | Norm. I. |
|-----|----------------|---------|--------|----------|
| 102 | 37.24201       | 2.41240 | 1 4 -2 | 0.00     |
| 103 | 37.37973       | 2.40383 | 3 3 -2 | 3.60     |
| 104 | 37.49737       | 2.39656 | 2 3 -3 | 0.90     |
| 105 | 37.60322       | 2.39006 | 3 1 3  | 0.90     |
| 106 | 37.94390       | 2.36938 | 2 4 1  | 4.40     |
| 107 | 38.01363       | 2.36519 | 1 4 2  | 0.00     |
| 108 | 38.21070       | 2.35344 | 4 0 2  | 4.40     |
| 109 | 38.29973       | 2.34818 | 4 2 1  | 3.00     |
| 110 | 38.48734       | 2.33716 | 2 0 4  | 1.10     |
| 111 | 38.64459       | 2.32801 | 1 2 4  | 3.00     |
| 112 | 38.81495       | 2.31819 | 4 2 -2 | 1.10     |
| 113 | 39.08797       | 2.30262 | 2 2 -4 | 4.50     |
| 114 | 39.11535       | 2.30107 | 4 1 2  | 0.00     |
| 115 | 39.22646       | 2.29481 | 3 0 -4 | 0.00     |
| 116 | 39.38661       | 2.28585 | 2 1 4  | 4.30     |
| 117 | 39.58545       | 2.27482 | 2 4 -2 | 0.00     |
| 118 | 39.64943       | 2.27130 | 3 3 2  | 10.80    |
| 119 | 39.76138       | 2.26516 | 2 3 3  | 3.10     |
| 120 | 39.95615       | 2.25457 | 4 1 -3 | 1.40     |
| 121 | 40.11180       | 2.24618 | 3 1 -4 | 2.00     |
| 122 | 40.30041       | 2.23610 | 3 2 3  | 0.30     |
| 123 | 41.04179       | 2.19740 | 2 4 2  | 0.00     |
| 124 | 41.06365       | 2.19628 | 5 0 0  | 0.00     |
| 125 | 41.08178       | 2.19535 | 4 3 0  | 3.60     |
| 126 | 41.09587       | 2.19463 | 3 4 0  | 0.00     |
| 127 | 41.24441       | 2.18707 | 4 3 -1 | 0.00     |
| 128 | 41.29133       | 2.18470 | 0 4 3  | 2.30     |
| 129 | 41.37982       | 2.18023 | 3 3 -3 | 0.00     |
| 130 | 41.42883       | 2.17776 | 0 3 4  | 0.00     |
| 131 | 41.43674       | 2.17736 | 3 4 -1 | 0.00     |
| 132 | 41.56879       | 2.17075 | 1 3 -4 | 2.50     |
| 133 | 41.60934       | 2.16873 | 1 4 -3 | 0.00     |
| 134 | 41.73034       | 2.16272 | 4 2 2  | 1.10     |
| 135 | 41.90068       | 2.15432 | 5 1 -1 | 0.00     |
| 136 | 41.91674       | 2.15353 | 5 1 0  | 0.00     |
| 137 | 41.96426       | 2.15120 | 1 5 0  | 0.00     |
| 138 | 41.98565       | 2.15016 | 0 5 1  | 0.00     |
| 139 | 41.98755       | 2.15007 | 2 2 4  | 12.30    |
| 140 | 42.41214       | 2.12952 | 1 1 -5 | 0.00     |

## ?-S8

| No. | 2 $\theta$ , ° | d, Å    | h k l  | Norm. I. |
|-----|----------------|---------|--------|----------|
| 141 | 42.44925       | 2.12774 | 0 1 5  | 4.30     |
| 142 | 42.49352       | 2.12563 | 3 4 1  | 0.00     |
| 143 | 42.52822       | 2.12397 | 4 2 -3 | 0.00     |
| 144 | 42.64822       | 2.11828 | 1 5 -1 | 0.00     |
| 145 | 42.65392       | 2.11801 | 4 3 1  | 0.00     |
| 146 | 42.66264       | 2.11759 | 1 4 3  | 3.50     |
| 147 | 42.67613       | 2.11695 | 3 2 -4 | 0.00     |
| 148 | 42.76254       | 2.11288 | 5 0 -2 | 0.00     |
| 149 | 42.96961       | 2.10317 | 1 3 4  | 1.80     |
| 150 | 42.99476       | 2.10200 | 1 5 1  | 0.00     |
| 151 | 43.12576       | 2.09592 | 4 3 -2 | 0.00     |
| 152 | 43.37625       | 2.08439 | 2 3 -4 | 0.80     |
| 153 | 43.48269       | 2.07954 | 3 4 -2 | 0.00     |
| 154 | 43.50456       | 2.07854 | 3 0 4  | 0.00     |
| 155 | 43.58652       | 2.07482 | 2 4 -3 | 5.40     |
| 156 | 43.58852       | 2.07473 | 5 1 -2 | 0.00     |
| 157 | 43.63518       | 2.07262 | 5 1 1  | 0.00     |
| 158 | 44.02244       | 2.05529 | 2 1 -5 | 0.00     |
| 159 | 44.13040       | 2.05051 | 1 1 5  | 0.00     |
| 160 | 44.17595       | 2.04850 | 4 1 3  | 7.30     |
| 161 | 44.31944       | 2.04220 | 3 1 4  | 0.00     |
| 162 | 44.38040       | 2.03953 | 5 2 -1 | 0.00     |
| 163 | 44.39574       | 2.03887 | 5 2 0  | 0.00     |
| 164 | 44.43545       | 2.03714 | 2 5 0  | 0.00     |
| 165 | 44.43958       | 2.03696 | 4 0 -4 | 6.00     |
| 166 | 44.49233       | 2.03466 | 3 3 3  | 6.20     |
| 167 | 44.51711       | 2.03359 | 0 5 2  | 0.00     |
| 168 | 44.86907       | 2.01845 | 1 2 -5 | 0.00     |
| 169 | 44.90454       | 2.01694 | 0 2 5  | 0.00     |
| 170 | 44.92268       | 2.01617 | 2 5 -1 | 3.00     |
| 171 | 44.98341       | 2.01359 | 1 5 -2 | 0.00     |
| 172 | 45.24108       | 2.00271 | 4 1 -4 | 1.30     |
| 173 | 45.49948       | 1.99194 | 3 4 2  | 0.00     |
| 174 | 45.58598       | 1.98836 | 2 5 1  | 0.00     |
| 175 | 45.59966       | 1.98780 | 2 4 3  | 0.00     |
| 176 | 45.64602       | 1.98589 | 1 5 2  | 1.20     |
| 177 | 45.81588       | 1.97892 | 4 3 2  | 1.90     |
| 178 | 45.99522       | 1.97162 | 5 2 -2 | 8.40     |
| 179 | 46.03995       | 1.96981 | 5 2 1  | 0.00     |

## ?-S8

| No. | 2 $\theta$ , ° | d, Å    | h k l  | Norm. I. |
|-----|----------------|---------|--------|----------|
| 180 | 46.05474       | 1.96921 | 2 3 4  | 0.00     |
| 181 | 46.12692       | 1.96629 | 5 0 2  | 8.30     |
| 182 | 46.41135       | 1.95490 | 2 2 -5 | 1.60     |
| 183 | 46.51494       | 1.95079 | 1 2 5  | 0.00     |
| 184 | 46.55760       | 1.94910 | 4 3 -3 | 0.00     |
| 185 | 46.55866       | 1.94906 | 4 2 3  | 2.90     |
| 186 | 46.69534       | 1.94367 | 3 3 -4 | 0.00     |
| 187 | 46.69640       | 1.94363 | 3 2 4  | 0.00     |
| 188 | 46.78600       | 1.94012 | 4 4 0  | 13.30    |
| 189 | 46.83233       | 1.93831 | 5 1 -3 | 0.00     |
| 190 | 46.90585       | 1.93544 | 5 1 2  | 0.00     |
| 191 | 46.93270       | 1.93440 | 4 4 -1 | 0.00     |
| 192 | 47.00769       | 1.93148 | 2 5 -2 | 0.00     |
| 193 | 47.05494       | 1.92966 | 3 4 -3 | 0.00     |
| 194 | 47.09920       | 1.92794 | 0 4 4  | 0.00     |
| 195 | 47.14530       | 1.92617 | 3 1 -5 | 4.20     |
| 196 | 47.22568       | 1.92308 | 1 4 -4 | 0.00     |
| 197 | 47.31580       | 1.91962 | 2 1 5  | 2.80     |
| 198 | 47.58205       | 1.90950 | 4 2 -4 | 0.30     |
| 199 | 48.20921       | 1.88611 | 4 4 1  | 0.00     |
| 200 | 48.28269       | 1.88342 | 2 5 2  | 0.00     |
| 201 | 48.28755       | 1.88324 | 5 3 -1 | 0.00     |
| 202 | 48.30192       | 1.88271 | 5 3 0  | 0.00     |
| 203 | 48.33027       | 1.88167 | 3 5 0  | 4.80     |
| 204 | 48.49632       | 1.87562 | 1 4 4  | 0.00     |
| 205 | 48.50237       | 1.87540 | 0 5 3  | 5.40     |
| 206 | 48.63054       | 1.87075 | 3 5 -1 | 0.00     |
| 207 | 48.63849       | 1.87047 | 4 4 -2 | 9.50     |
| 208 | 48.74577       | 1.86660 | 1 3 -5 | 0.00     |
| 209 | 48.77906       | 1.86540 | 0 3 5  | 0.00     |
| 210 | 48.78283       | 1.86527 | 1 5 -3 | 4.70     |
| 211 | 48.86677       | 1.86226 | 2 4 -4 | 0.00     |
| 212 | 49.11492       | 1.85343 | 5 2 -3 | 0.00     |
| 213 | 49.18584       | 1.85092 | 5 2 2  | 0.60     |
| 214 | 49.41693       | 1.84281 | 3 2 -5 | 0.50     |
| 215 | 49.56547       | 1.83763 | 3 5 1  | 0.00     |
| 216 | 49.58153       | 1.83708 | 2 2 5  | 2.30     |
| 217 | 49.59307       | 1.83668 | 4 0 4  | 0.00     |
| 218 | 49.71564       | 1.83243 | 1 5 3  | 1.50     |

## ?-S8

| No. | 2 $\theta$ , ° | d, Å    | h k l  | Norm. I. |
|-----|----------------|---------|--------|----------|
| 219 | 49.77945       | 1.83023 | 6 0 0  | 0.00     |
| 220 | 49.80440       | 1.82938 | 5 3 -2 | 0.00     |
| 221 | 49.84181       | 1.82809 | 0 6 0  | 2.90     |
| 222 | 49.84653       | 1.82793 | 5 3 1  | 0.00     |
| 223 | 49.88701       | 1.82654 | 3 4 3  | 0.00     |
| 224 | 50.19650       | 1.81600 | 2 3 -5 | 0.00     |
| 225 | 50.26504       | 1.81369 | 1 0 -6 | 0.00     |
| 226 | 50.29418       | 1.81270 | 1 3 5  | 6.20     |
| 227 | 50.33125       | 1.81145 | 4 1 4  | 0.00     |
| 228 | 50.33542       | 1.81131 | 4 3 3  | 0.00     |
| 229 | 50.34893       | 1.81086 | 6 1 -1 | 0.00     |
| 230 | 50.44584       | 1.80761 | 3 5 -2 | 0.00     |
| 231 | 50.45049       | 1.80745 | 0 0 6  | 0.00     |
| 232 | 50.46536       | 1.80696 | 3 3 4  | 0.00     |
| 233 | 50.51563       | 1.80527 | 6 1 0  | 5.90     |
| 234 | 50.53853       | 1.80451 | 2 5 -3 | 0.00     |
| 235 | 50.57561       | 1.80327 | 1 6 0  | 0.00     |
| 236 | 50.59413       | 1.80266 | 0 6 1  | 0.00     |
| 237 | 50.68050       | 1.79979 | 5 0 -4 | 1.90     |
| 238 | 50.94720       | 1.79099 | 6 0 -2 | 3.70     |
| 239 | 50.99610       | 1.78939 | 1 1 -6 | 0.00     |
| 240 | 51.10323       | 1.78589 | 4 4 2  | 5.30     |
| 241 | 51.16907       | 1.78374 | 1 6 -1 | 6.70     |
| 242 | 51.17963       | 1.78340 | 0 1 6  | 0.00     |
| 243 | 51.30209       | 1.77943 | 4 3 -4 | 0.00     |
| 244 | 51.32342       | 1.77874 | 2 4 4  | 0.00     |
| 245 | 51.40728       | 1.77604 | 5 1 -4 | 0.00     |
| 246 | 51.47080       | 1.77399 | 1 6 1  | 3.10     |
| 247 | 51.50331       | 1.77295 | 5 1 3  | 0.00     |
| 248 | 51.53415       | 1.77196 | 2 0 -6 | 0.00     |
| 249 | 51.57178       | 1.77076 | 4 1 -5 | 0.00     |
| 250 | 51.67127       | 1.76758 | 6 1 -2 | 0.00     |
| 251 | 51.78765       | 1.76388 | 4 4 -3 | 0.00     |
| 252 | 51.79512       | 1.76365 | 3 1 5  | 2.20     |
| 253 | 51.91496       | 1.75986 | 3 4 -4 | 0.60     |
| 254 | 52.07927       | 1.75469 | 1 0 6  | 0.00     |
| 255 | 52.16105       | 1.75213 | 6 1 1  | 3.20     |
| 256 | 52.25240       | 1.74928 | 2 1 -6 | 0.00     |
| 257 | 52.25554       | 1.74919 | 3 5 2  | 0.00     |

## ?-S8

| No. | 2 $\theta$ , ° | d, Å    | h k l  | Norm. I. |
|-----|----------------|---------|--------|----------|
| 258 | 52.34592       | 1.74638 | 2 5 3  | 3.20     |
| 259 | 52.50036       | 1.74160 | 4 2 4  | 2.30     |
| 260 | 52.51752       | 1.74108 | 6 2 -1 | 0.00     |
| 261 | 52.67928       | 1.73611 | 6 2 0  | 0.00     |
| 262 | 52.73251       | 1.73448 | 2 6 0  | 0.00     |
| 263 | 52.75500       | 1.73380 | 5 3 -3 | 2.10     |
| 264 | 52.79225       | 1.73266 | 1 1 6  | 0.00     |
| 265 | 52.80437       | 1.73229 | 0 6 2  | 0.00     |
| 266 | 52.82236       | 1.73174 | 5 3 2  | 0.00     |
| 267 | 53.04193       | 1.72509 | 3 3 -5 | 2.20     |
| 268 | 53.14574       | 1.72197 | 1 2 -6 | 0.00     |
| 269 | 53.16178       | 1.72148 | 2 6 -1 | 0.00     |
| 270 | 53.19841       | 1.72038 | 2 3 5  | 0.00     |
| 271 | 53.21537       | 1.71988 | 1 6 -2 | 7.60     |
| 272 | 53.32401       | 1.71663 | 0 2 6  | 3.50     |
| 273 | 53.39140       | 1.71462 | 5 4 -1 | 0.00     |
| 274 | 53.40477       | 1.71422 | 5 4 0  | 0.00     |
| 275 | 53.41960       | 1.71378 | 4 5 0  | 4.00     |
| 276 | 53.54518       | 1.71006 | 5 2 -4 | 6.20     |
| 277 | 53.55279       | 1.70983 | 4 5 -1 | 0.00     |
| 278 | 53.63851       | 1.70730 | 5 2 3  | 0.00     |
| 279 | 53.66383       | 1.70656 | 3 5 -3 | 0.00     |
| 280 | 53.70406       | 1.70537 | 0 5 4  | 0.00     |
| 281 | 53.70506       | 1.70534 | 4 2 -5 | 0.00     |
| 282 | 53.74817       | 1.70408 | 2 6 1  | 0.00     |
| 283 | 53.80136       | 1.70252 | 1 6 2  | 0.00     |
| 284 | 53.80177       | 1.70251 | 6 2 -2 | 0.00     |
| 285 | 53.81786       | 1.70204 | 1 4 -5 | 0.00     |
| 286 | 53.81904       | 1.70200 | 1 5 -4 | 4.60     |
| 287 | 53.84887       | 1.70113 | 0 4 5  | 0.00     |
| 288 | 53.92217       | 1.69899 | 3 2 5  | 0.00     |
| 289 | 54.18448       | 1.69138 | 3 0 -6 | 1.60     |
| 290 | 54.27804       | 1.68869 | 6 2 1  | 2.40     |
| 291 | 54.36691       | 1.68614 | 2 2 -6 | 2.20     |
| 292 | 54.40489       | 1.68505 | 6 1 -3 | 0.00     |
| 293 | 54.49997       | 1.68233 | 6 0 2  | 1.30     |
| 294 | 54.71544       | 1.67622 | 4 5 1  | 0.00     |
| 295 | 54.80565       | 1.67367 | 5 4 -2 | 0.00     |
| 296 | 54.84503       | 1.67256 | 5 4 1  | 0.00     |

## ?-S8

| No. | 2 $\theta$ , ° | d, Å    | h k l  | Norm. I. |
|-----|----------------|---------|--------|----------|
| 297 | 54.87842       | 1.67162 | 3 1 -6 | 4.70     |
| 298 | 54.89230       | 1.67123 | 1 2 6  | 0.00     |
| 299 | 54.97785       | 1.66884 | 1 5 4  | 0.00     |
| 300 | 55.01252       | 1.66787 | 2 6 -2 | 7.60     |
| 301 | 55.06022       | 1.66653 | 2 0 6  | 0.00     |
| 302 | 55.10790       | 1.66520 | 4 5 -2 | 4.10     |
| 303 | 55.17237       | 1.66341 | 2 4 -5 | 0.00     |
| 304 | 55.19121       | 1.66289 | 6 1 2  | 0.00     |
| 305 | 55.26381       | 1.66088 | 1 4 5  | 0.00     |
| 306 | 55.30241       | 1.65981 | 4 4 3  | 0.00     |
| 307 | 55.31688       | 1.65941 | 2 5 -4 | 2.10     |
| 308 | 55.42410       | 1.65645 | 3 4 4  | 0.00     |
| 309 | 55.74679       | 1.64762 | 2 1 6  | 0.00     |
| 310 | 55.98313       | 1.64123 | 4 3 4  | 0.00     |
| 311 | 55.99955       | 1.64079 | 6 3 -1 | 0.00     |
| 312 | 56.15441       | 1.63663 | 6 3 0  | 0.00     |
| 313 | 56.15465       | 1.63662 | 2 6 2  | 0.00     |
| 314 | 56.19742       | 1.63548 | 3 6 0  | 0.00     |
| 315 | 56.20887       | 1.63517 | 4 4 -4 | 0.00     |
| 316 | 56.25332       | 1.63398 | 3 5 3  | 0.00     |
| 317 | 56.35220       | 1.63135 | 0 6 3  | 0.00     |
| 318 | 56.46393       | 1.62839 | 6 2 -3 | 0.00     |
| 319 | 56.46755       | 1.62829 | 3 6 -1 | 0.00     |
| 320 | 56.53533       | 1.62650 | 5 0 4  | 0.00     |
| 321 | 56.60127       | 1.62476 | 1 3 -6 | 0.00     |
| 322 | 56.60471       | 1.62467 | 1 6 -3 | 0.00     |
| 323 | 56.77216       | 1.62028 | 0 3 6  | 0.00     |
| 324 | 56.92600       | 1.61626 | 3 2 -6 | 0.00     |
| 325 | 56.98427       | 1.61475 | 5 3 -4 | 0.00     |
| 326 | 57.07380       | 1.61243 | 5 3 3  | 0.00     |
| 327 | 57.09524       | 1.61187 | 5 1 -5 | 0.00     |
| 328 | 57.13765       | 1.61078 | 4 3 -5 | 0.00     |
| 329 | 57.21018       | 1.60891 | 5 1 4  | 0.00     |
| 330 | 57.23045       | 1.60839 | 6 3 -2 | 0.00     |
| 331 | 57.23137       | 1.60836 | 6 2 2  | 0.00     |
| 332 | 57.31119       | 1.60631 | 3 6 1  | 0.00     |
| 333 | 57.34602       | 1.60542 | 3 3 5  | 0.00     |
| 334 | 57.36318       | 1.60498 | 4 1 5  | 0.00     |
| 335 | 57.37460       | 1.60469 | 4 5 2  | 0.00     |

## ?-S8

| No. | 2 $\theta$ , ° | d, Å    | h k l  | Norm. I. |
|-----|----------------|---------|--------|----------|
| 336 | 57.44704       | 1.60284 | 1 6 3  | 0.00     |
| 337 | 57.57621       | 1.59955 | 5 4 -3 | 0.00     |
| 338 | 57.57816       | 1.59950 | 2 5 4  | 0.00     |
| 339 | 57.63974       | 1.59793 | 5 4 2  | 0.00     |
| 340 | 57.68776       | 1.59672 | 6 3 1  | 0.00     |
| 341 | 57.74978       | 1.59515 | 6 0 -4 | 0.00     |
| 342 | 57.77313       | 1.59456 | 2 3 -6 | 0.00     |
| 343 | 57.77404       | 1.59454 | 2 2 6  | 0.00     |
| 344 | 57.84692       | 1.59270 | 3 4 -5 | 0.00     |
| 345 | 57.99463       | 1.58900 | 2 4 5  | 0.00     |
| 346 | 58.00786       | 1.58867 | 4 5 -3 | 0.00     |
| 347 | 58.08740       | 1.58668 | 4 0 -6 | 0.00     |
| 348 | 58.10903       | 1.58614 | 3 6 -2 | 0.00     |
| 349 | 58.12584       | 1.58572 | 3 5 -4 | 0.00     |
| 350 | 58.19322       | 1.58405 | 2 6 -3 | 0.00     |
| 351 | 58.27817       | 1.58194 | 1 3 6  | 0.00     |
| 352 | 58.41561       | 1.57855 | 6 1 -4 | 0.00     |
| 353 | 58.75081       | 1.57034 | 4 1 -6 | 0.00     |
| 354 | 58.81512       | 1.56877 | 7 0 0  | 0.00     |
| 355 | 59.09257       | 1.56207 | 5 2 -5 | 0.00     |
| 356 | 59.18713       | 1.55980 | 7 1 -1 | 0.00     |
| 357 | 59.20505       | 1.55937 | 5 2 4  | 0.00     |
| 358 | 59.25768       | 1.55811 | 3 0 6  | 0.00     |
| 359 | 59.35479       | 1.55579 | 4 2 5  | 0.00     |
| 360 | 59.46570       | 1.55315 | 6 1 3  | 0.00     |
| 361 | 59.47346       | 1.55297 | 7 1 0  | 0.00     |
| 362 | 59.49787       | 1.55239 | 5 5 -1 | 0.00     |
| 363 | 59.51032       | 1.55209 | 5 5 0  | 0.00     |
| 364 | 59.54717       | 1.55122 | 1 7 0  | 0.00     |
| 365 | 59.56376       | 1.55083 | 0 7 1  | 0.00     |
| 366 | 59.58782       | 1.55026 | 7 0 -2 | 0.00     |
| 367 | 59.75901       | 1.54623 | 3 6 2  | 0.00     |
| 368 | 59.79188       | 1.54546 | 6 3 -3 | 0.00     |
| 369 | 59.84176       | 1.54429 | 2 6 3  | 0.00     |
| 370 | 59.89547       | 1.54303 | 1 5 -5 | 0.00     |
| 371 | 59.91303       | 1.54262 | 3 1 6  | 0.00     |
| 372 | 59.92440       | 1.54236 | 0 5 5  | 0.00     |
| 373 | 59.98324       | 1.54098 | 1 1 -7 | 0.00     |
| 374 | 60.07976       | 1.53874 | 1 7 -1 | 0.00     |



## ?-S8

| No. | 2 $\theta$ , ° | d, Å    | h k l  | Norm. I. |
|-----|----------------|---------|--------|----------|
| 375 | 60.23774       | 1.53508 | 3 3 -6 | 0.00     |
| 376 | 60.24098       | 1.53501 | 7 1 -2 | 0.00     |
| 377 | 60.28373       | 1.53402 | 0 1 7  | 0.00     |
| 378 | 60.35116       | 1.53247 | 1 7 1  | 0.00     |
| 379 | 60.38548       | 1.53168 | 6 2 -4 | 0.00     |
| 380 | 60.53259       | 1.52831 | 6 3 2  | 0.00     |
| 381 | 60.63380       | 1.52600 | 4 4 4  | 0.00     |
| 382 | 60.64941       | 1.52564 | 6 4 -1 | 0.00     |
| 383 | 60.71399       | 1.52417 | 4 2 -6 | 0.00     |
| 384 | 60.79674       | 1.52230 | 6 4 0  | 0.00     |
| 385 | 60.81856       | 1.52180 | 5 5 -2 | 0.00     |
| 386 | 60.82705       | 1.52161 | 4 6 0  | 0.00     |
| 387 | 60.85543       | 1.52097 | 5 5 1  | 0.00     |
| 388 | 60.94957       | 1.51885 | 4 6 -1 | 0.00     |
| 389 | 60.97969       | 1.51817 | 2 1 -7 | 0.00     |
| 390 | 61.05178       | 1.51655 | 3 6 -3 | 0.00     |
| 391 | 61.05694       | 1.51643 | 2 3 6  | 0.00     |
| 392 | 61.08849       | 1.51572 | 7 1 1  | 0.00     |
| 393 | 61.08881       | 1.51572 | 0 6 4  | 0.00     |
| 394 | 61.14177       | 1.51453 | 7 2 -1 | 0.00     |
| 395 | 61.16202       | 1.51408 | 2 5 -5 | 0.00     |
| 396 | 61.19470       | 1.51335 | 1 6 -4 | 0.00     |
| 397 | 61.22214       | 1.51274 | 1 4 -6 | 0.00     |
| 398 | 61.24771       | 1.51217 | 1 5 5  | 0.00     |
| 399 | 61.28390       | 1.51136 | 4 5 3  | 0.00     |
| 400 | 61.38494       | 1.50911 | 0 4 6  | 0.00     |
| 401 | 61.39800       | 1.50882 | 3 5 4  | 0.00     |
| 402 | 61.41497       | 1.50845 | 6 2 3  | 0.00     |
| 403 | 61.42258       | 1.50828 | 7 2 0  | 0.00     |
| 404 | 61.49037       | 1.50678 | 2 7 0  | 0.00     |
| 405 | 61.55546       | 1.50534 | 0 7 2  | 0.00     |
| 406 | 61.58711       | 1.50464 | 5 4 -4 | 0.00     |
| 407 | 61.67247       | 1.50277 | 5 4 3  | 0.00     |
| 408 | 61.73337       | 1.50143 | 4 4 -5 | 0.00     |
| 409 | 61.82188       | 1.49949 | 6 4 -2 | 0.00     |
| 410 | 61.85384       | 1.49879 | 3 2 6  | 0.00     |
| 411 | 61.86987       | 1.49844 | 1 1 7  | 0.00     |
| 412 | 61.87952       | 1.49823 | 2 7 -1 | 0.00     |
| 413 | 61.92275       | 1.49729 | 1 2 -7 | 0.00     |

## ?-S8

| No. | 2 $\theta$ , ° | d, Å    | h k l  | Norm. I. |
|-----|----------------|---------|--------|----------|
| 414 | 61.92816       | 1.49717 | 1 7 -2 | 0.00     |
| 415 | 61.93214       | 1.49709 | 3 4 5  | 0.00     |
| 416 | 62.02184       | 1.49514 | 4 6 1  | 0.00     |
| 417 | 62.13486       | 1.49269 | 4 5 -4 | 0.00     |
| 418 | 62.17571       | 1.49181 | 7 2 -2 | 0.00     |
| 419 | 62.21768       | 1.49090 | 0 2 7  | 0.00     |
| 420 | 62.25834       | 1.49002 | 6 4 1  | 0.00     |
| 421 | 62.26451       | 1.48989 | 1 6 4  | 0.00     |
| 422 | 62.33293       | 1.48842 | 5 3 -5 | 0.00     |
| 423 | 62.33987       | 1.48827 | 2 4 -6 | 0.00     |
| 424 | 62.38487       | 1.48731 | 4 6 -2 | 0.00     |
| 425 | 62.41235       | 1.48672 | 2 7 1  | 0.00     |
| 426 | 62.44191       | 1.48608 | 5 3 4  | 0.00     |
| 427 | 62.46076       | 1.48568 | 1 7 2  | 0.00     |
| 428 | 62.57840       | 1.48317 | 2 6 -4 | 0.00     |
| 429 | 62.58701       | 1.48299 | 4 3 5  | 0.00     |
| 430 | 62.59418       | 1.48283 | 7 1 -3 | 0.00     |
| 431 | 62.82251       | 1.47799 | 1 4 6  | 0.00     |
| 432 | 62.90109       | 1.47634 | 2 2 -7 | 0.00     |
| 433 | 63.00797       | 1.47409 | 7 2 1  | 0.00     |
| 434 | 63.10280       | 1.47210 | 5 0 -6 | 0.00     |
| 435 | 63.23678       | 1.46930 | 3 1 -7 | 0.00     |
| 436 | 63.34213       | 1.46711 | 7 0 2  | 0.00     |
| 437 | 63.42286       | 1.46544 | 5 5 -3 | 0.00     |
| 438 | 63.44739       | 1.46493 | 3 6 3  | 0.00     |
| 439 | 63.48283       | 1.46420 | 5 5 2  | 0.00     |
| 440 | 63.55918       | 1.46263 | 6 1 -5 | 0.00     |
| 441 | 63.56598       | 1.46249 | 2 7 -2 | 0.00     |
| 442 | 63.58672       | 1.46206 | 6 3 -4 | 0.00     |
| 443 | 63.67846       | 1.46017 | 3 5 -5 | 0.00     |
| 444 | 63.73476       | 1.45902 | 5 1 -6 | 0.00     |
| 445 | 63.77584       | 1.45818 | 1 2 7  | 0.00     |
| 446 | 63.81802       | 1.45732 | 2 5 5  | 0.00     |
| 447 | 63.86630       | 1.45633 | 5 1 5  | 0.00     |
| 448 | 63.90569       | 1.45553 | 4 3 -6 | 0.00     |
| 449 | 63.97278       | 1.45416 | 7 1 2  | 0.00     |
| 450 | 64.21777       | 1.44921 | 6 0 4  | 0.00     |
| 451 | 64.27226       | 1.44811 | 6 4 -3 | 0.00     |
| 452 | 64.32126       | 1.44712 | 7 3 -1 | 0.00     |

**?-S8**

| No. | 2 $\theta$ , ° | d, Å    | h k l  | Norm. I. |
|-----|----------------|---------|--------|----------|
| 453 | 64.48812       | 1.44378 | 7 2 -3 | 0.00     |
| 454 | 64.49172       | 1.44371 | 4 6 2  | 0.00     |
| 455 | 64.53503       | 1.44285 | 4 0 6  | 0.00     |
| 456 | 64.58681       | 1.44181 | 6 3 3  | 0.00     |
| 457 | 64.59422       | 1.44167 | 7 3 0  | 0.00     |
| 458 | 64.61348       | 1.44128 | 2 7 2  | 0.00     |
| 459 | 64.65280       | 1.44050 | 3 7 0  | 0.00     |
| 460 | 64.68175       | 1.43993 | 2 6 4  | 0.00     |
| 461 | 64.68690       | 1.43982 | 2 1 7  | 0.00     |
| 462 | 64.70017       | 1.43956 | 3 4 -6 | 0.00     |
| 463 | 64.79516       | 1.43768 | 0 7 3  | 0.00     |
| 464 | 64.84377       | 1.43672 | 6 1 4  | 0.00     |
| 465 | 64.90131       | 1.43559 | 3 7 -1 | 0.00     |
| 466 | 64.98337       | 1.43397 | 6 4 2  | 0.00     |
